# Supplementary material for: Historical greenhouse gas concentrations for climate modelling (CMIP6)
Source: Copernicus journal article supplement (doi:10.5194/gmd-10-2057-2017), 2017-05-31
Supplement: Supplementary file 1 [file gmd-2016-169-SUPPLEMENT.pdf › gmd-2016-169-SUPPLEMENT.pdf]

## List of Figures

|     |                                                                                  |    |
|-----|----------------------------------------------------------------------------------|----|
| S1  | CCl <sub>4</sub> Factsheet . . . . .                                             | 4  |
| S2  | CFC-11 Factsheet . . . . .                                                       | 5  |
| S3  | CFC-12 Factsheet . . . . .                                                       | 6  |
| S4  | CFC-113 Factsheet . . . . .                                                      | 7  |
| S5  | CFC-114 Factsheet . . . . .                                                      | 8  |
| S6  | CFC-115 Factsheet . . . . .                                                      | 9  |
| S7  | CH <sub>2</sub> Cl <sub>2</sub> Factsheet . . . . .                              | 10 |
| S8  | CH <sub>3</sub> Br Factsheet . . . . .                                           | 11 |
| S9  | CH <sub>3</sub> CCl <sub>3</sub> Factsheet . . . . .                             | 12 |
| S10 | CH <sub>3</sub> Cl Factsheet . . . . .                                           | 13 |
| S11 | CHCl <sub>3</sub> Factsheet . . . . .                                            | 14 |
| S12 | Halon-1211 Factsheet . . . . .                                                   | 15 |
| S13 | Halon-1301 Factsheet . . . . .                                                   | 16 |
| S14 | Halon-2402 Factsheet . . . . .                                                   | 17 |
| S15 | HCFC-22 Factsheet . . . . .                                                      | 18 |
| S16 | HCFC-141b Factsheet . . . . .                                                    | 19 |
| S17 | HCFC-142b Factsheet . . . . .                                                    | 20 |
| S18 | C <sub>2</sub> F <sub>6</sub> Factsheet . . . . .                                | 21 |
| S19 | C <sub>3</sub> F <sub>8</sub> Factsheet . . . . .                                | 22 |
| S20 | C <sub>4</sub> F <sub>10</sub> Factsheet . . . . .                               | 23 |
| S21 | C <sub>5</sub> F <sub>12</sub> Factsheet . . . . .                               | 24 |
| S22 | C <sub>6</sub> F <sub>14</sub> Factsheet . . . . .                               | 25 |
| S23 | C <sub>7</sub> F <sub>16</sub> Factsheet . . . . .                               | 26 |
| S24 | C <sub>8</sub> F <sub>18</sub> Factsheet . . . . .                               | 27 |
| S25 | c-C <sub>4</sub> F <sub>8</sub> Factsheet . . . . .                              | 28 |
| S26 | CF <sub>4</sub> Factsheet . . . . .                                              | 29 |
| S27 | HFC-23 Factsheet . . . . .                                                       | 30 |
| S28 | HFC-32 Factsheet . . . . .                                                       | 31 |
| S29 | HFC-43-10-mee Factsheet . . . . .                                                | 32 |
| S30 | HFC-125 Factsheet . . . . .                                                      | 33 |
| S31 | HFC-134a Factsheet . . . . .                                                     | 34 |
| S32 | HFC-143a Factsheet . . . . .                                                     | 35 |
| S33 | HFC-152a Factsheet . . . . .                                                     | 36 |
| S34 | HFC-227ea Factsheet . . . . .                                                    | 37 |
| S35 | HFC-236fa Factsheet . . . . .                                                    | 38 |
| S36 | HFC-245fa Factsheet . . . . .                                                    | 39 |
| S37 | HFC-365mfc Factsheet . . . . .                                                   | 40 |
| S38 | NF <sub>3</sub> Factsheet . . . . .                                              | 41 |
| S39 | SF <sub>6</sub> Factsheet . . . . .                                              | 42 |
| S40 | SO <sub>2</sub> F <sub>2</sub> Factsheet . . . . .                               | 43 |
| S41 | 1875 CO <sub>2</sub> concentrations fields for 8 CMIP5 ESMs . . . . .            | 45 |
| S42 | 1990 CO <sub>2</sub> concentrations fields for 8 CMIP5 ESMs . . . . .            | 46 |
| S43 | 1861-1890 CO <sub>2</sub> seasonal cycles for 9 CMIP5 ESMs . . . . .             | 47 |
| S44 | 1976-2005 CO <sub>2</sub> seasonal cycles for 9 CMIP5 ESMs . . . . .             | 48 |
| S45 | Latitudinal gradients of surface CO <sub>2</sub> for 9 CMIP5 ESMs . . . . .      | 49 |
| S46 | 1875, 1960, 1990 CO <sub>2</sub> concentration fields for 5 CMIP5 ESMs . . . . . | 50 |
| S47 | As Fig. S46, but for a different set of CMIP5 ESMs . . . . .                     | 51 |

**1 Supplement A:**

Factsheets of GHGs other than CO<sub>2</sub>, CH<sub>4</sub> and N<sub>2</sub>O



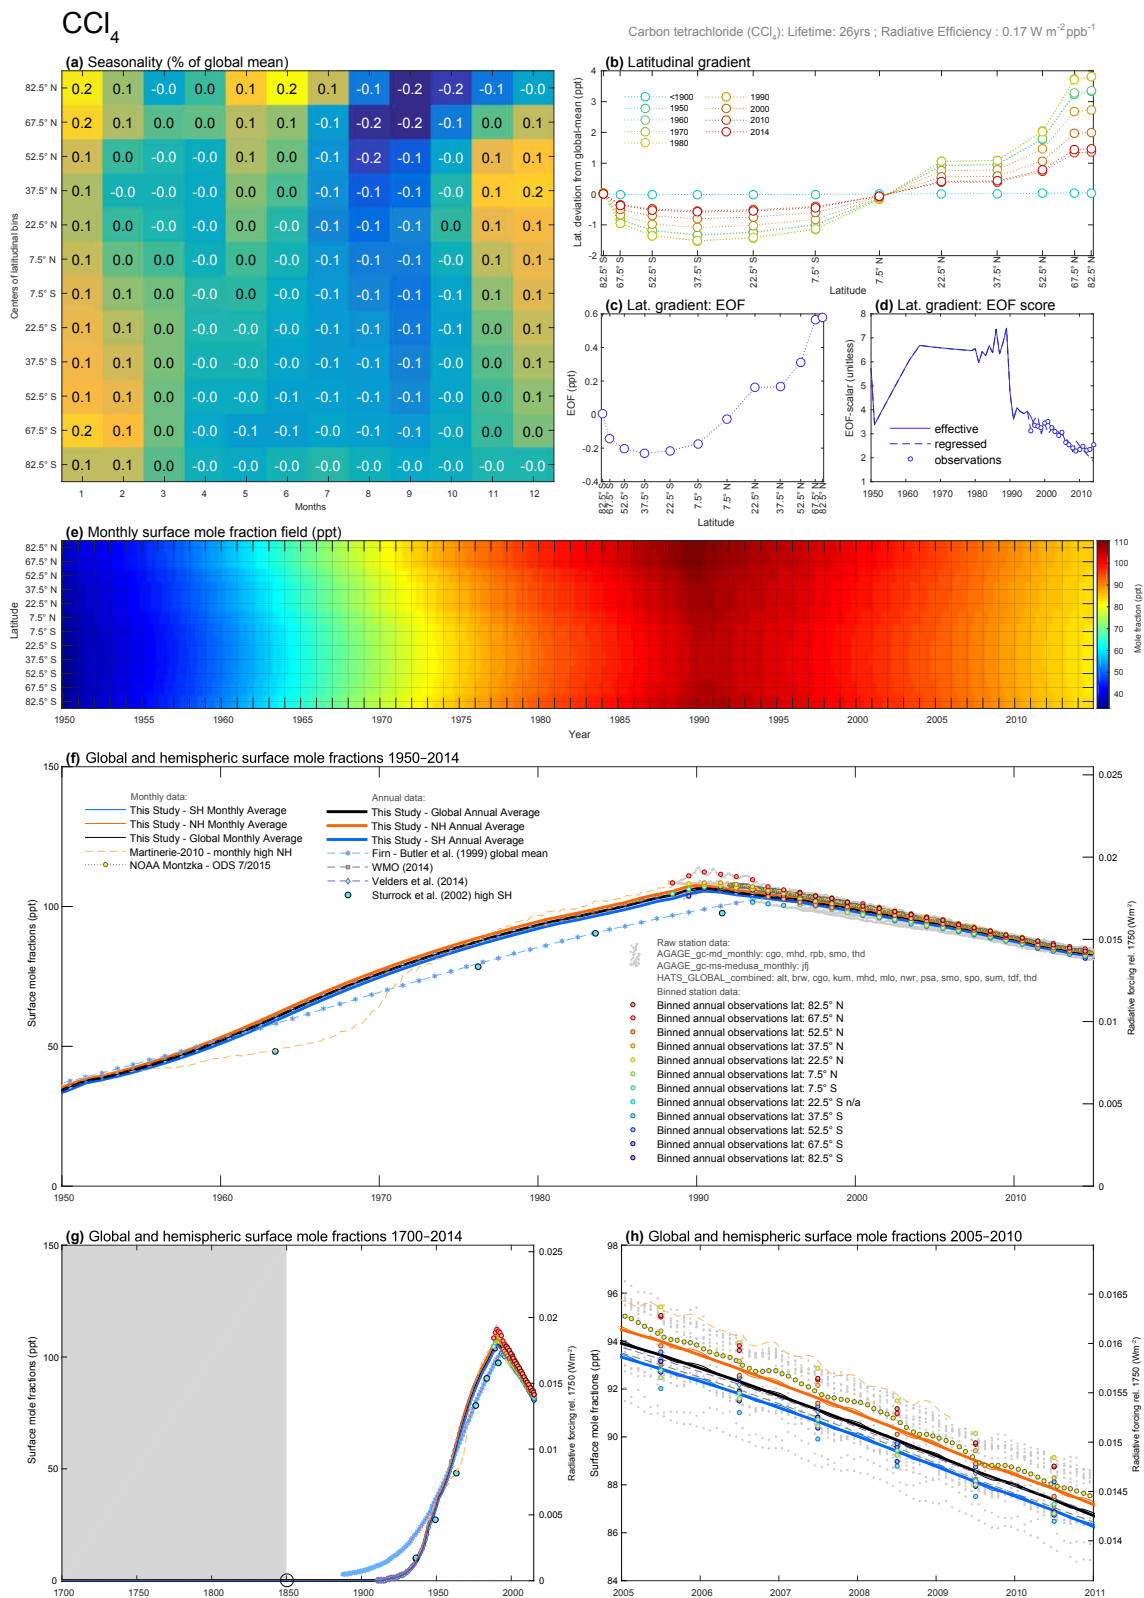Figure S1. CCl<sub>4</sub> Factsheet

## CFC-11

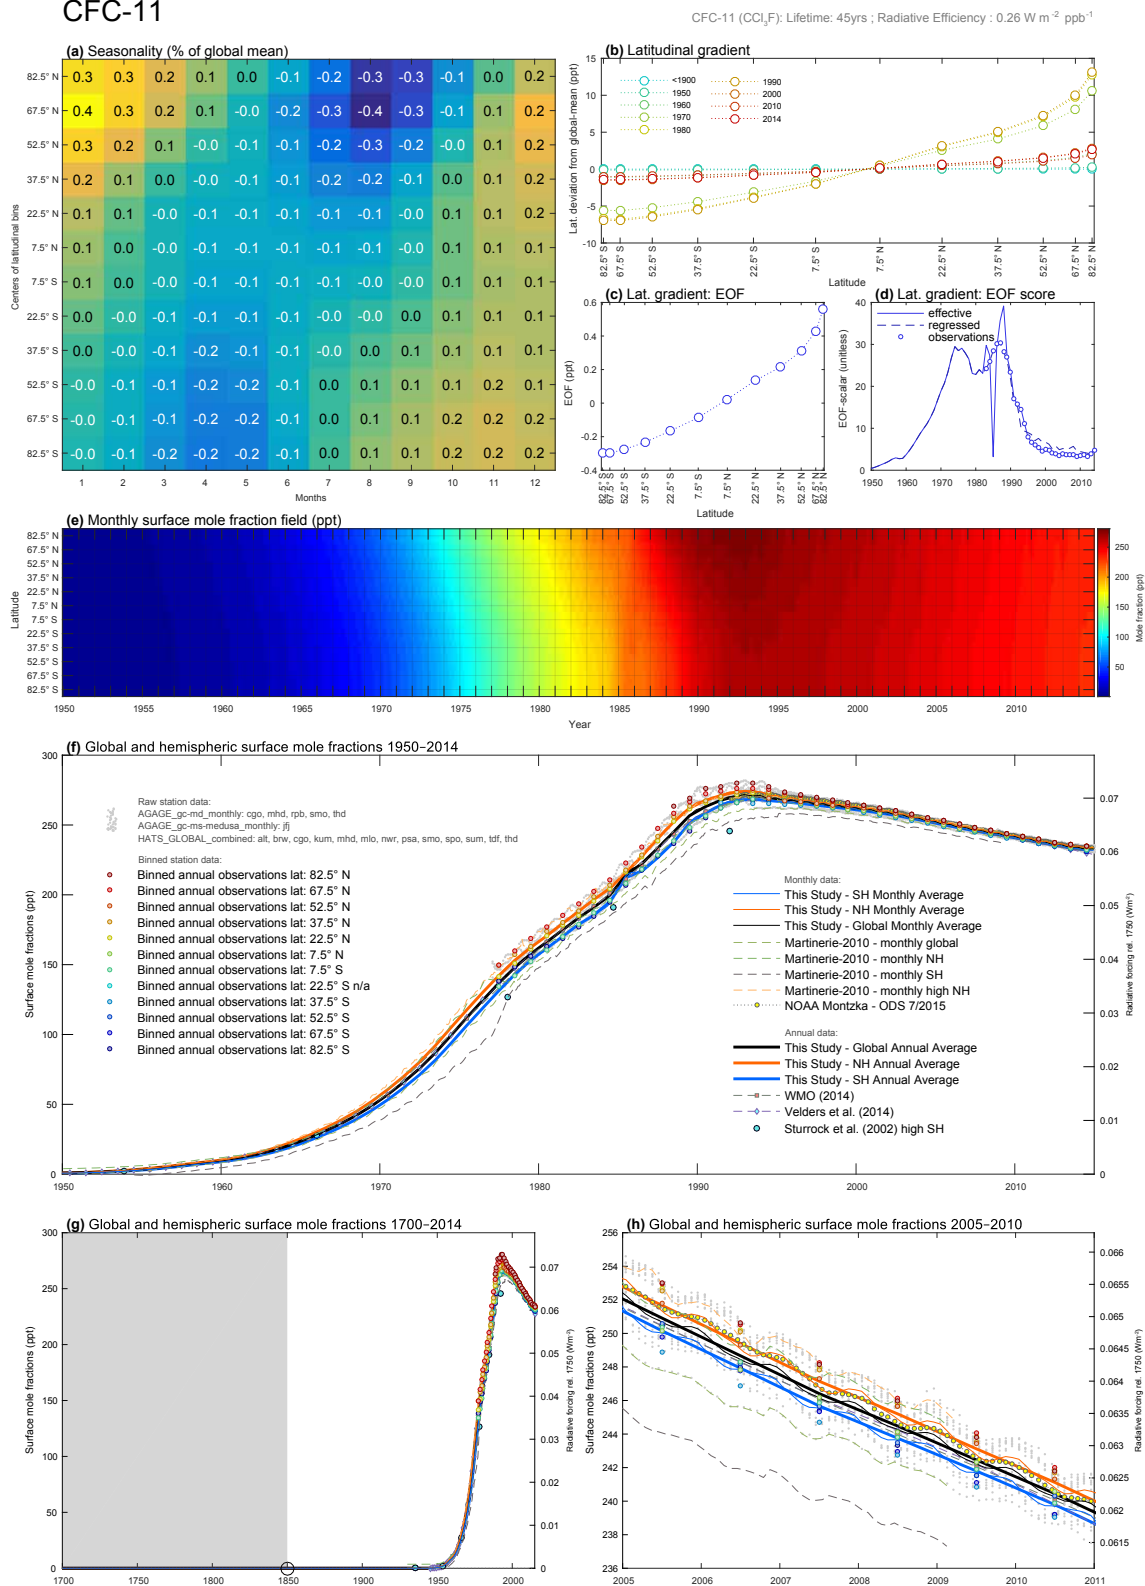

Figure S2. CFC-11 Factsheet

## CFC-12

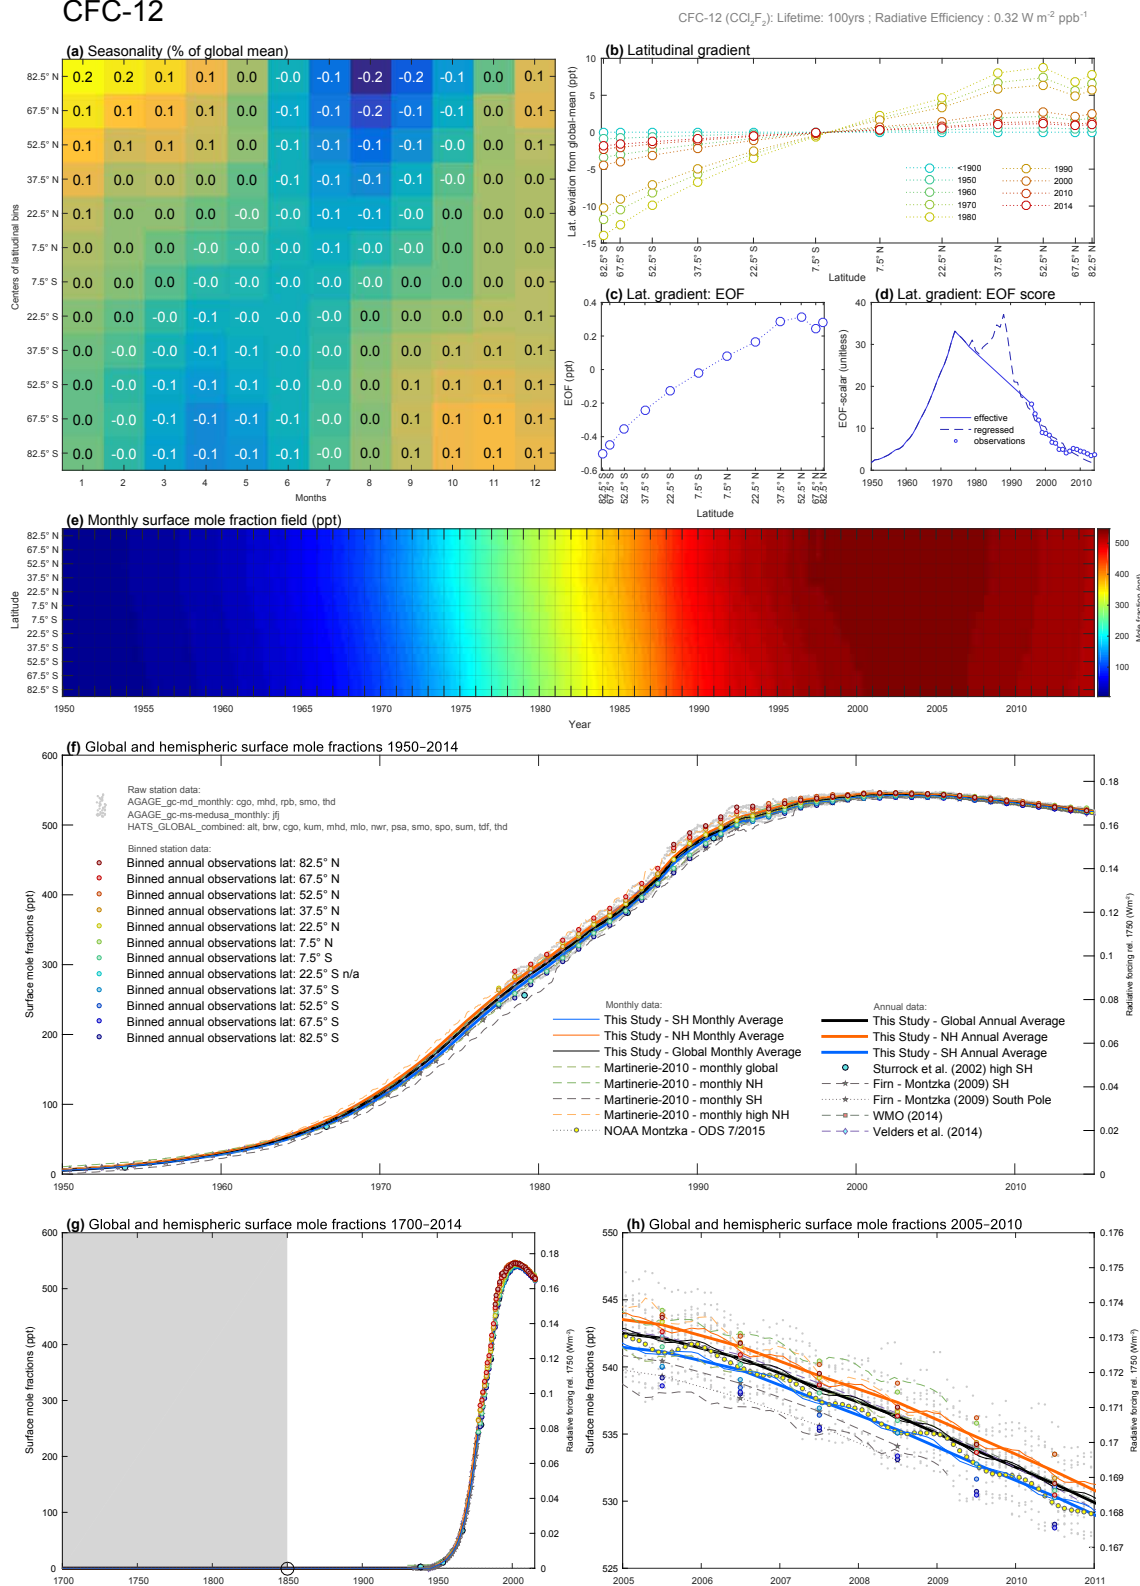

Figure S3. CFC-12 Factsheet

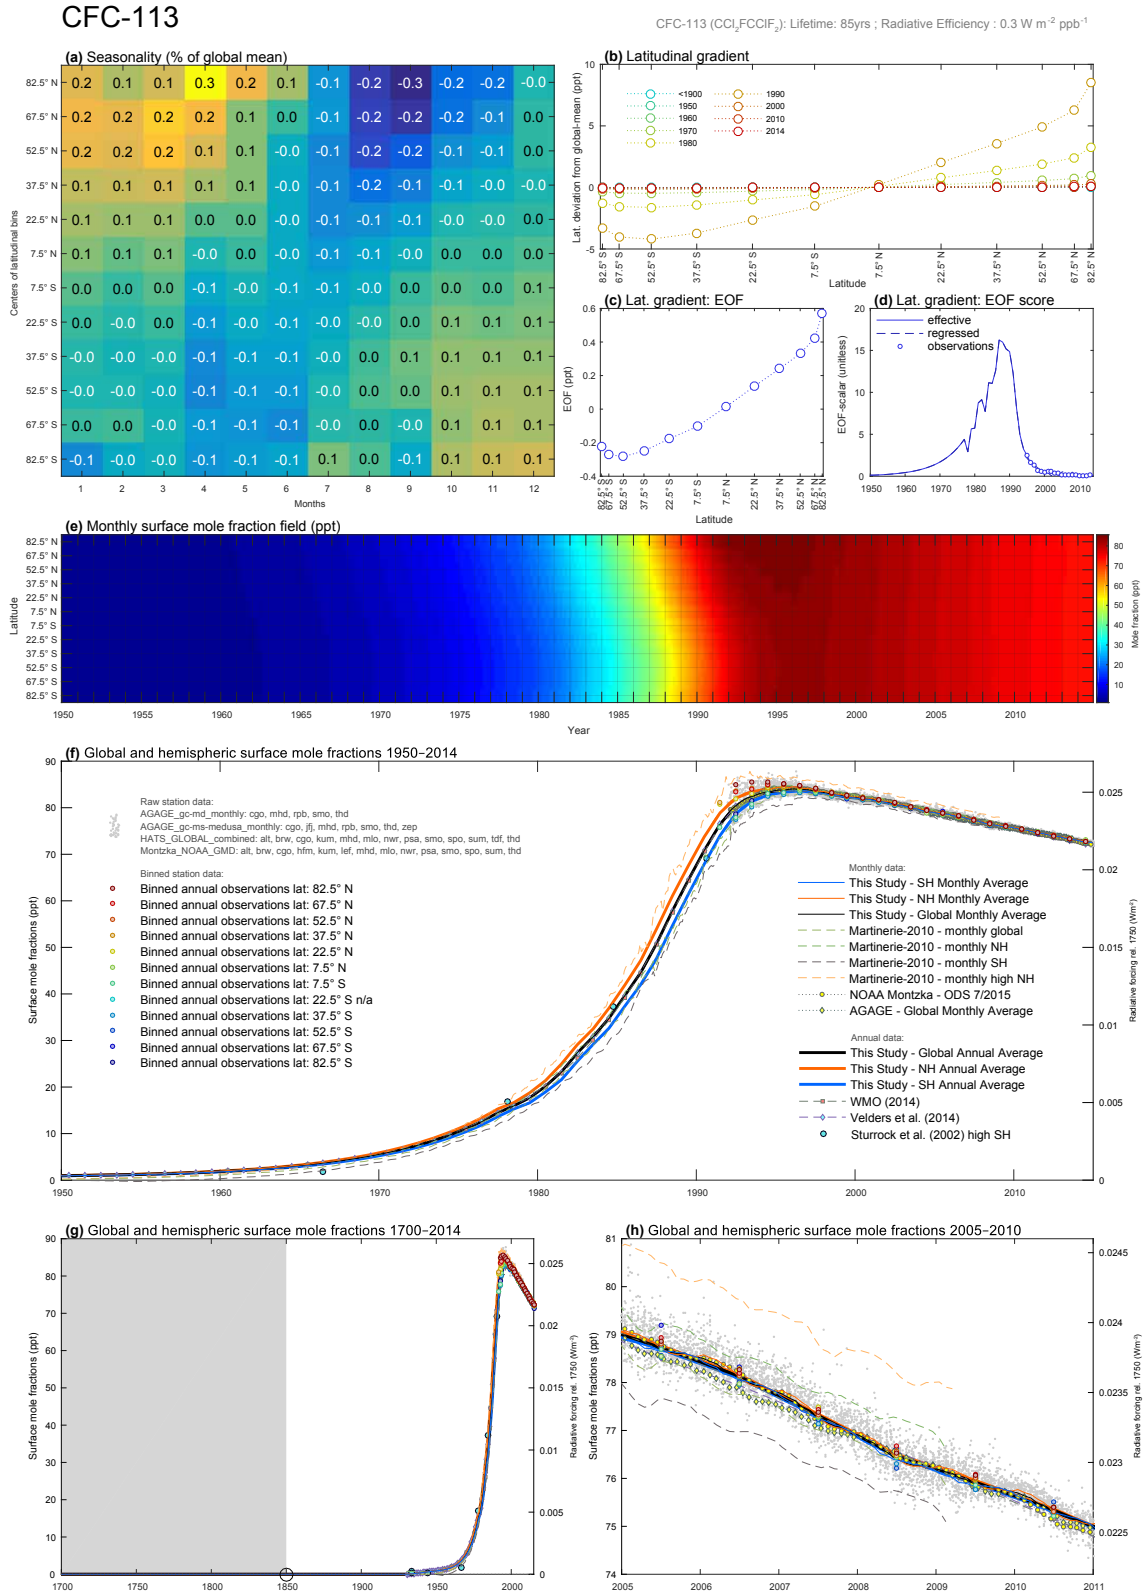

**Figure S4. CFC-113 Factsheet**

## CFC-114

CFC-114 (CClF<sub>2</sub>CClF<sub>2</sub>): Lifetime: 190yrs ; Radiative Efficiency : 0.31 W m<sup>-2</sup> ppb<sup>-1</sup>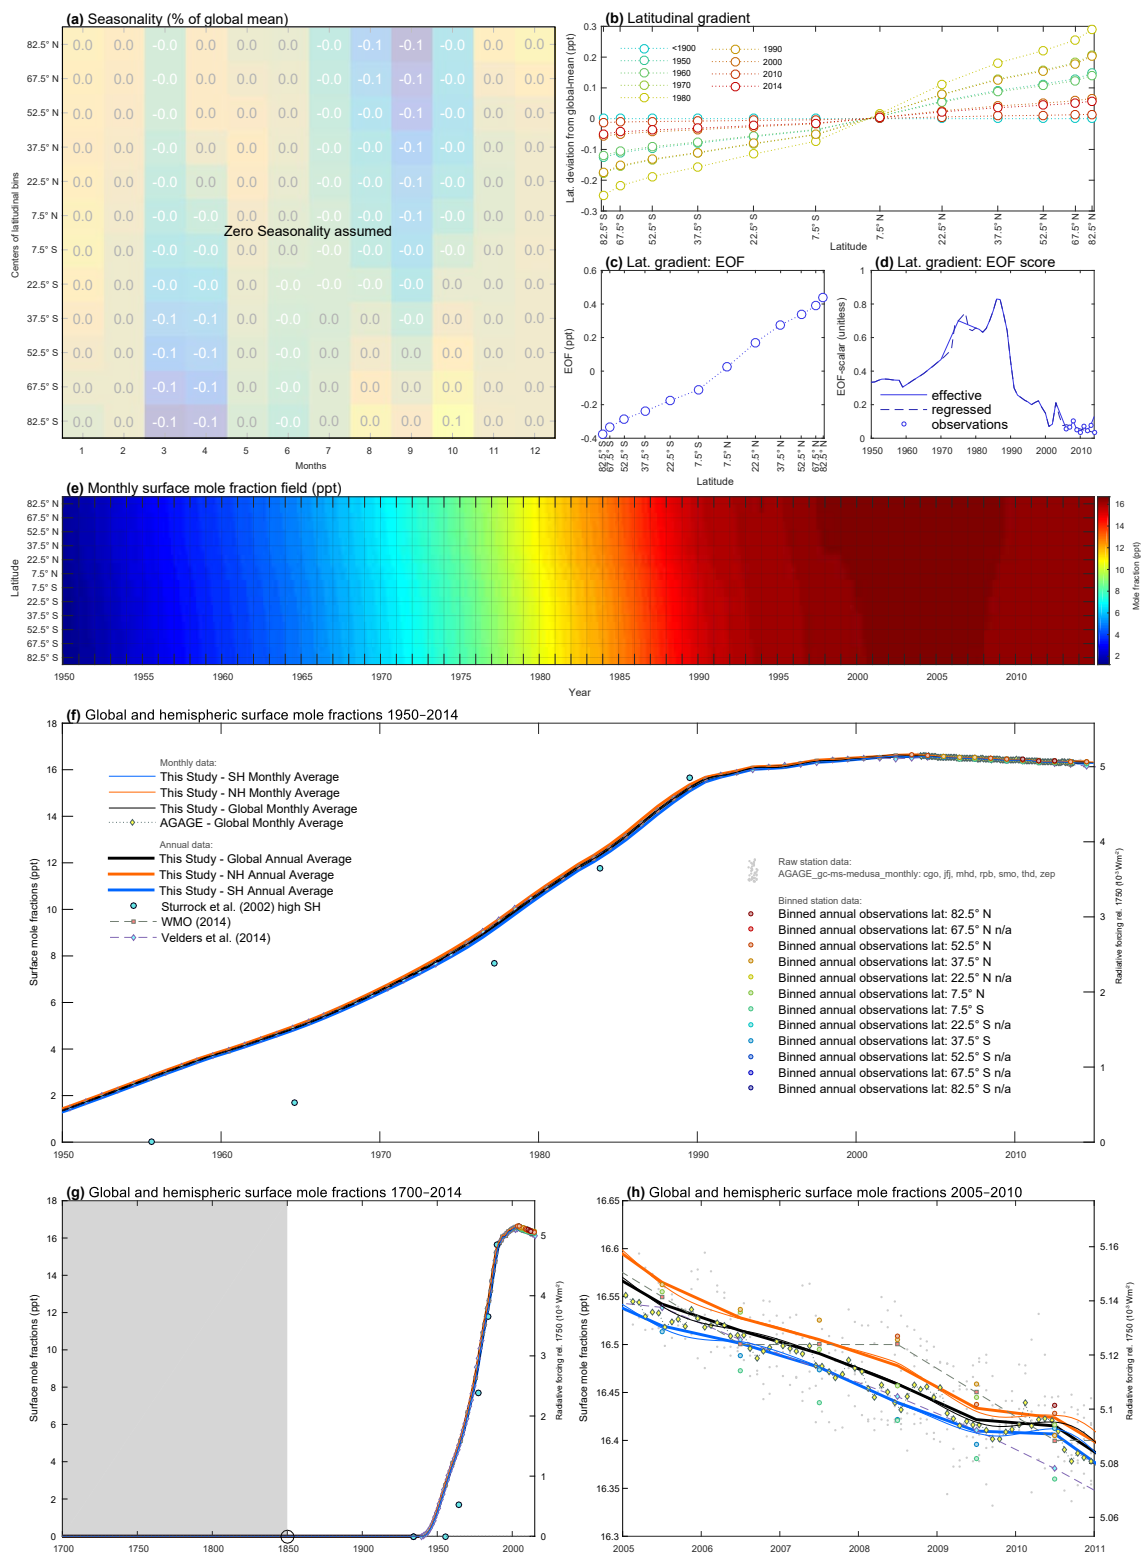

Figure S5. CFC-114 Factsheet

## CFC-115

CFC-115 (CClF<sub>3</sub>CF<sub>3</sub>): Lifetime: 1020yrs ; Radiative Efficiency : 0.2 W m<sup>-2</sup> ppb<sup>-1</sup>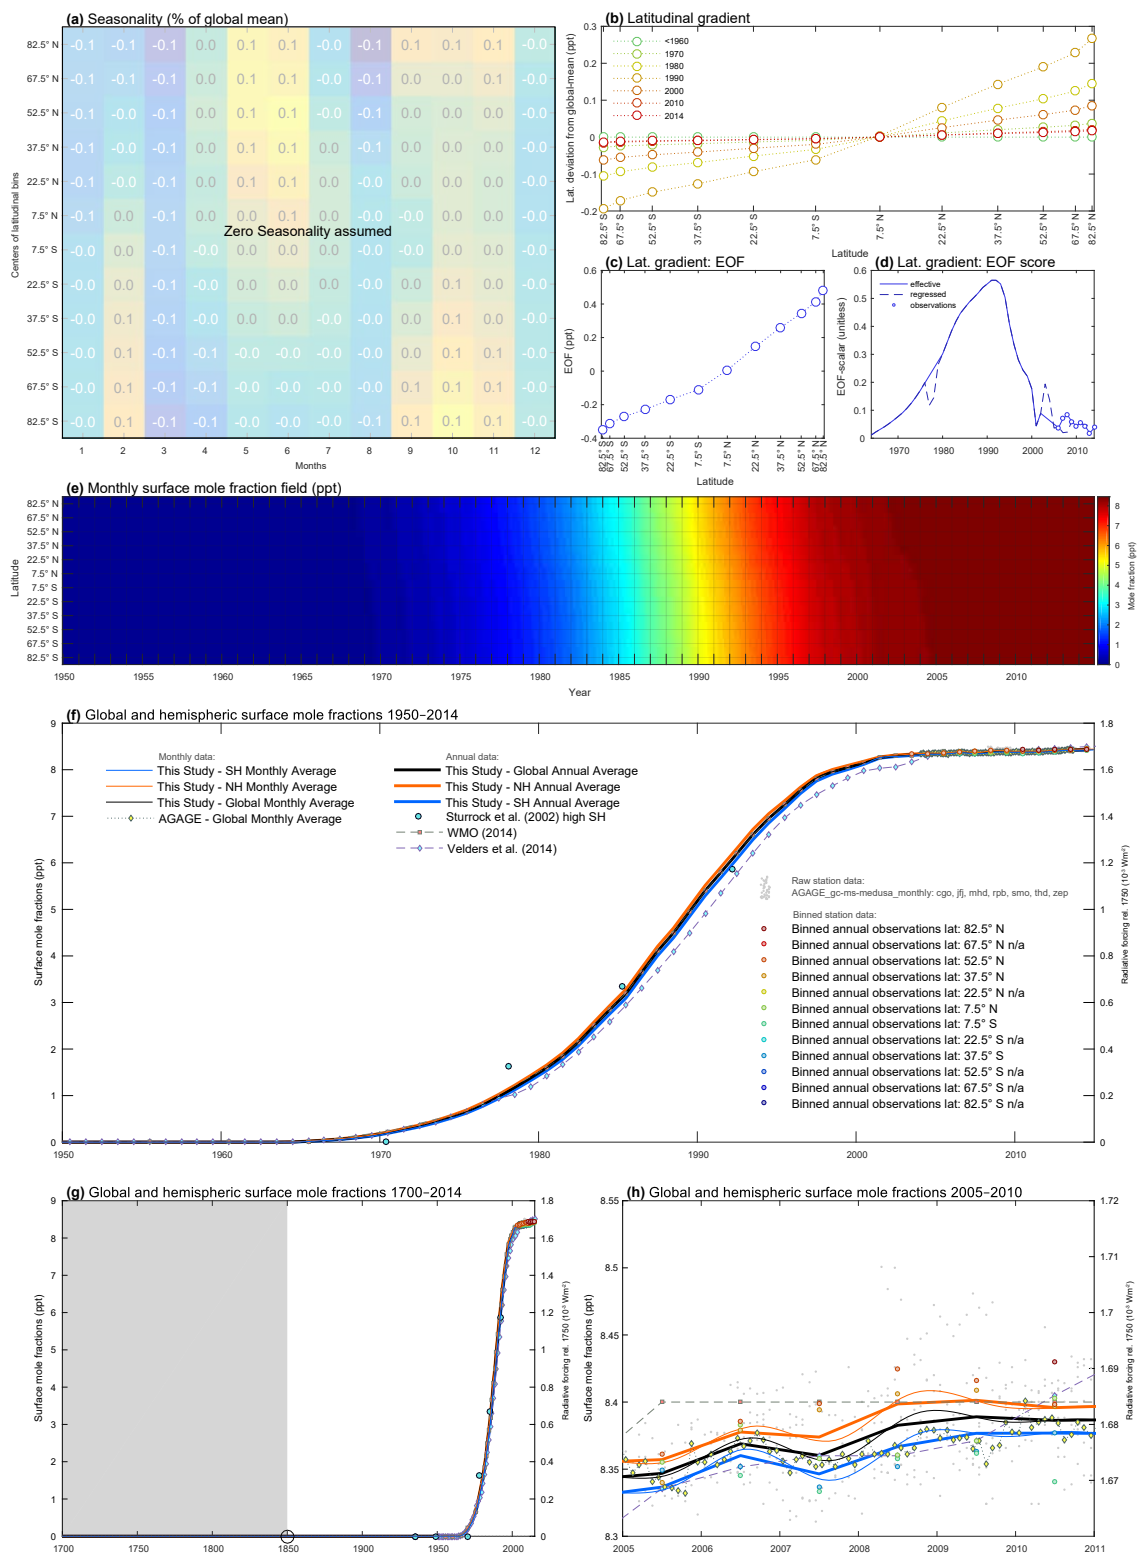

Figure S6. CFC-115 Factsheet



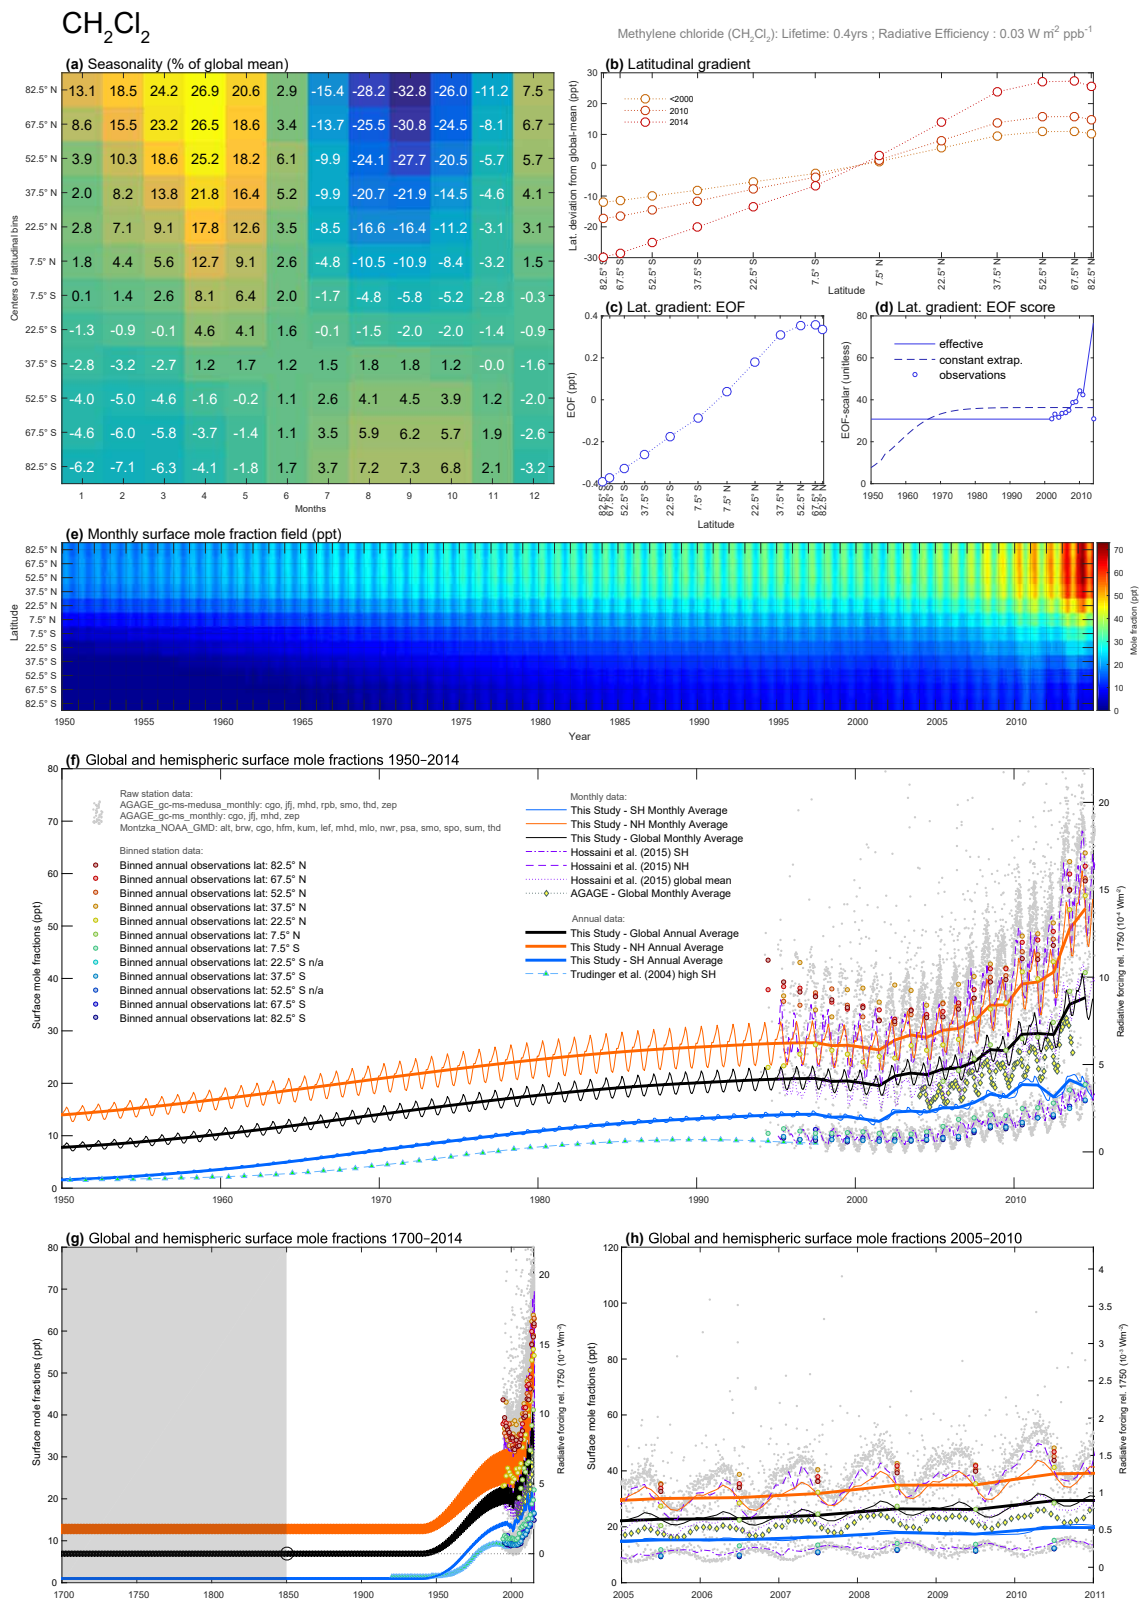Figure S7. CH<sub>2</sub>Cl<sub>2</sub> Factsheet

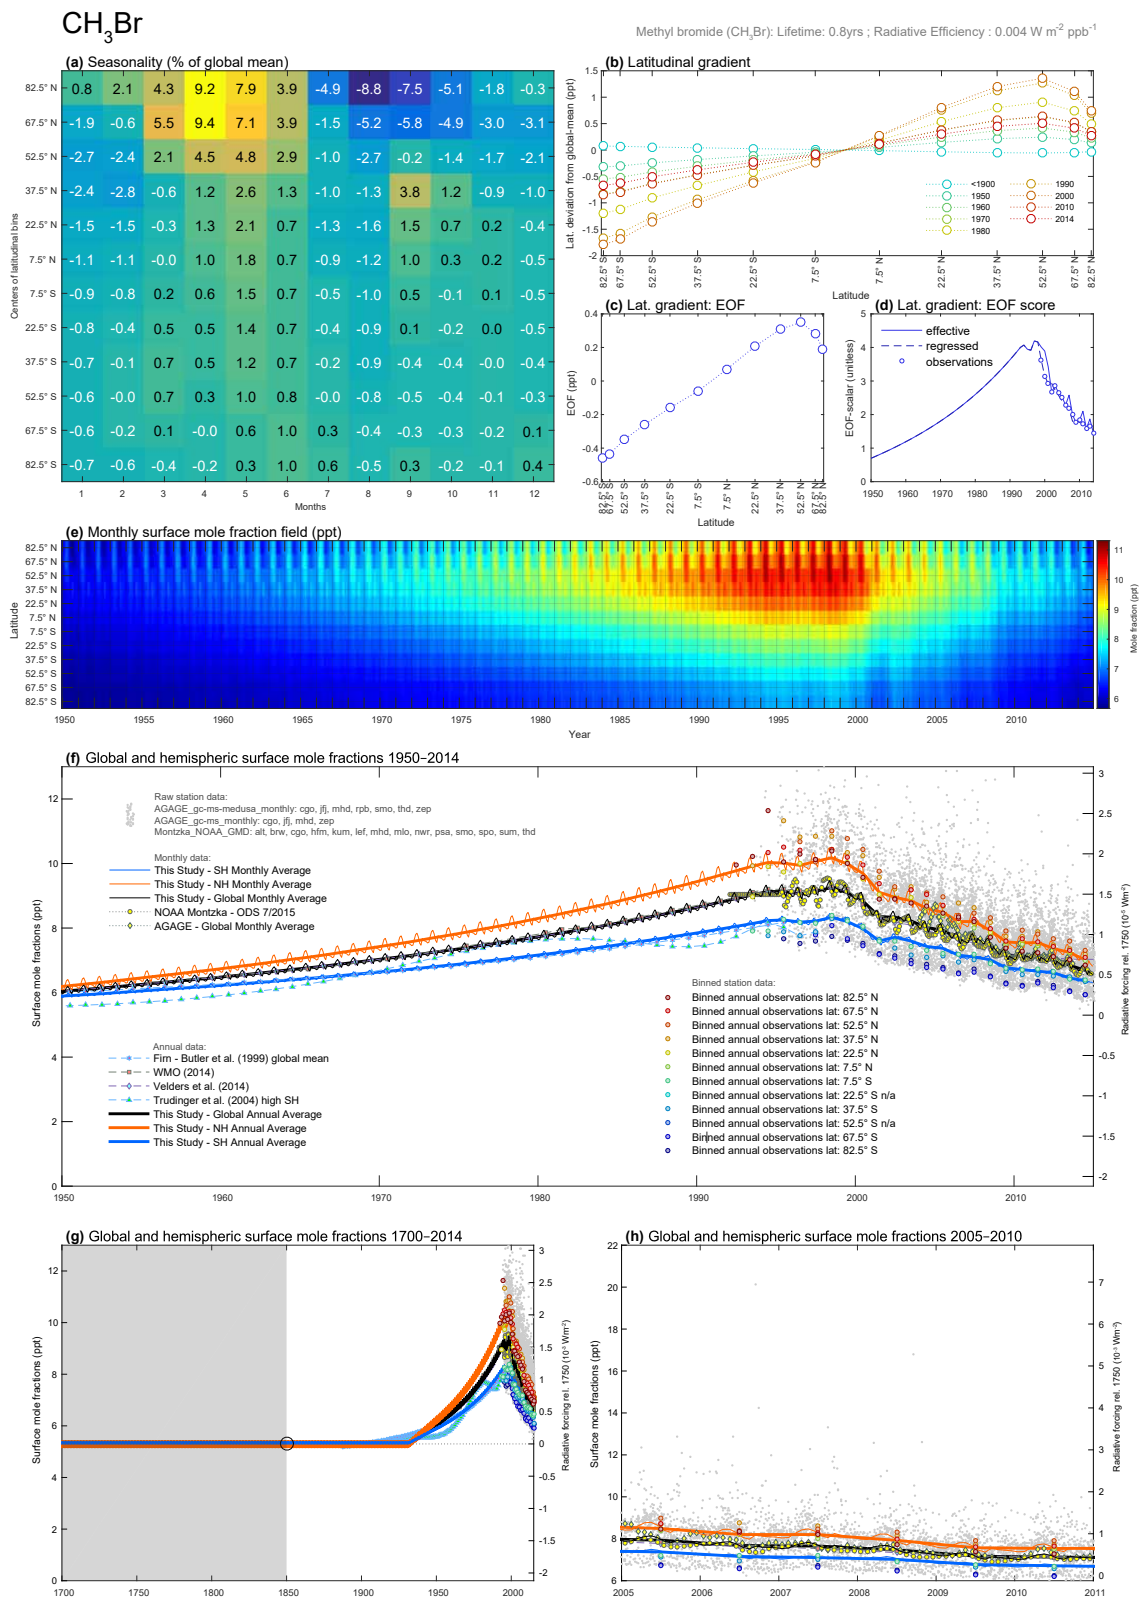Figure S8. CH<sub>3</sub>Br Factsheet



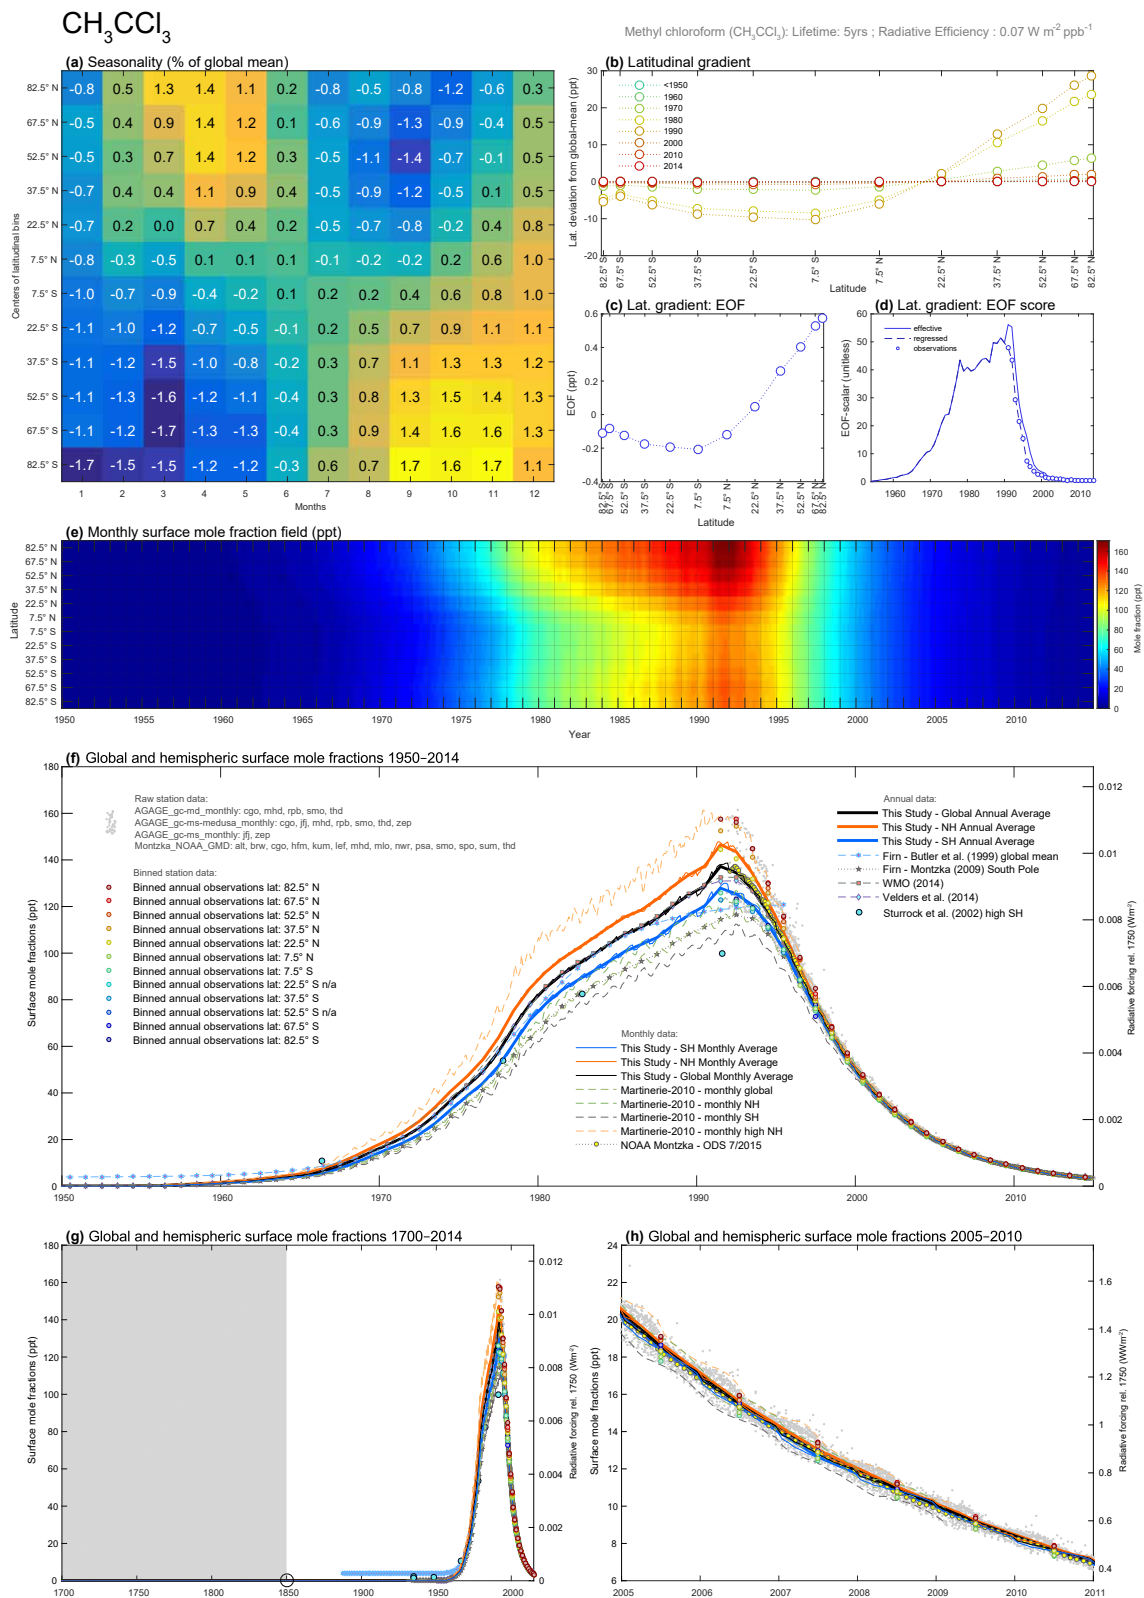Figure S9. CH<sub>3</sub>CCl<sub>3</sub> Factsheet

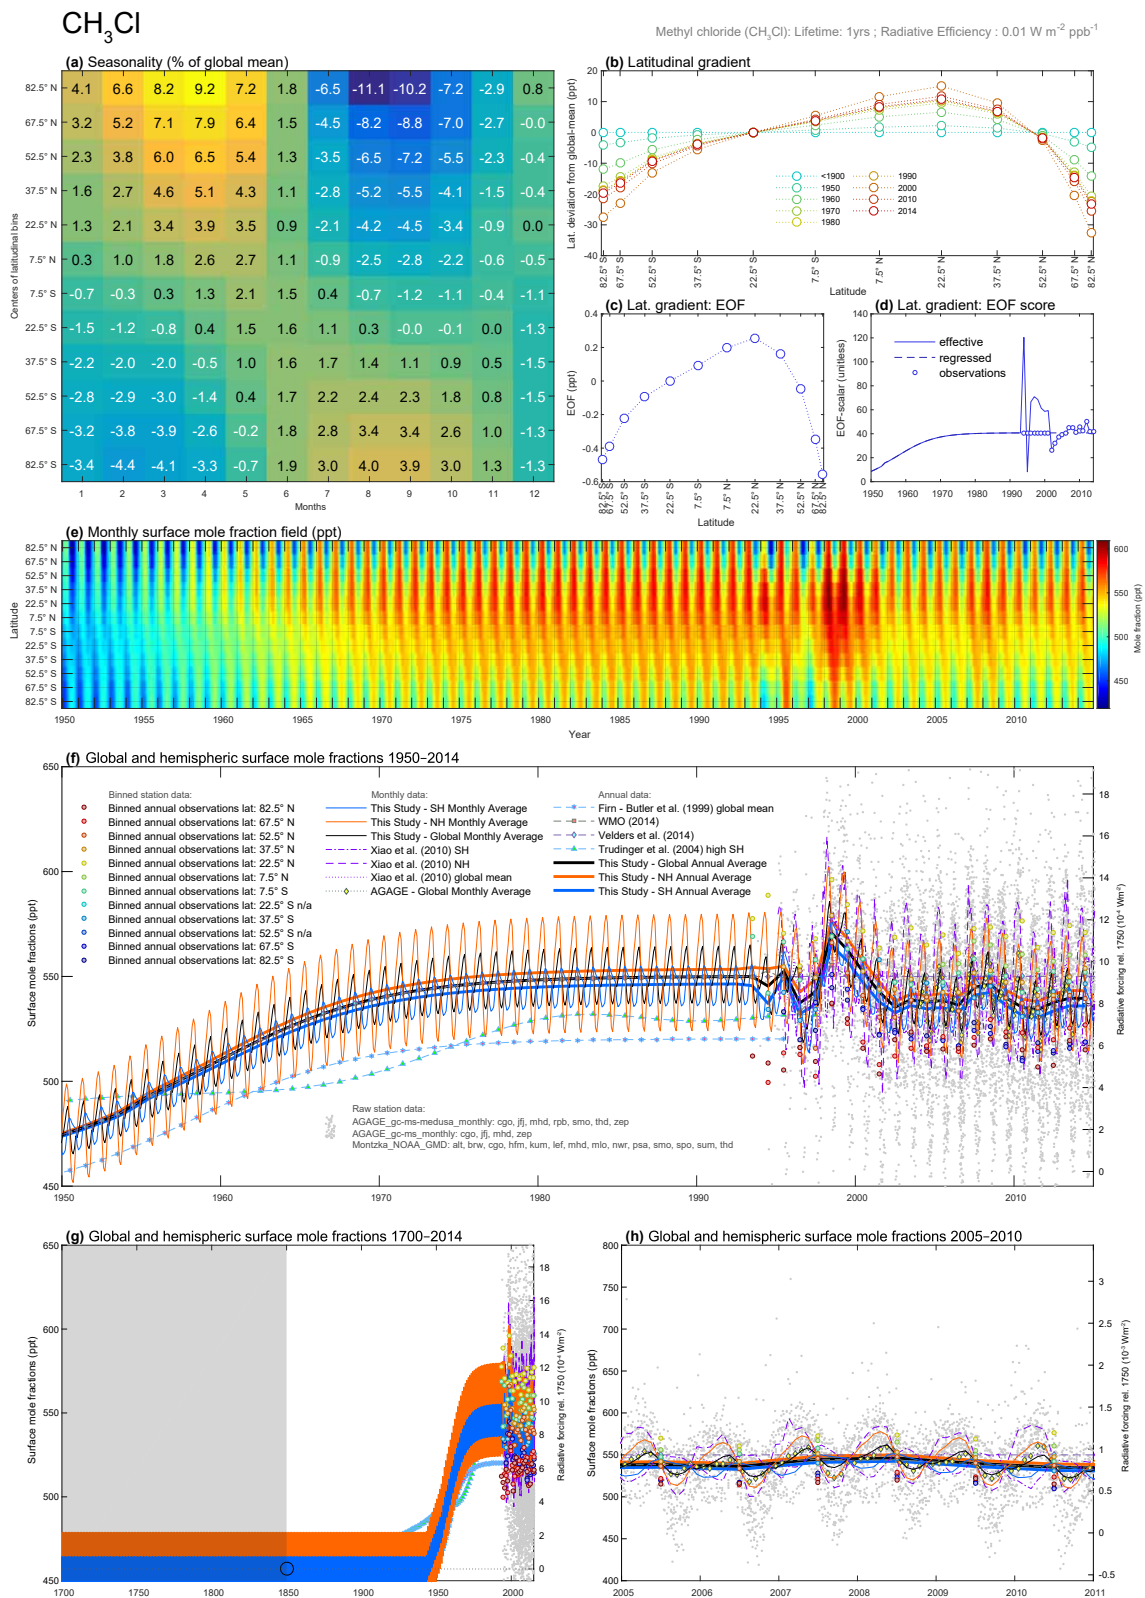Figure S10. CH<sub>3</sub>Cl Factsheet

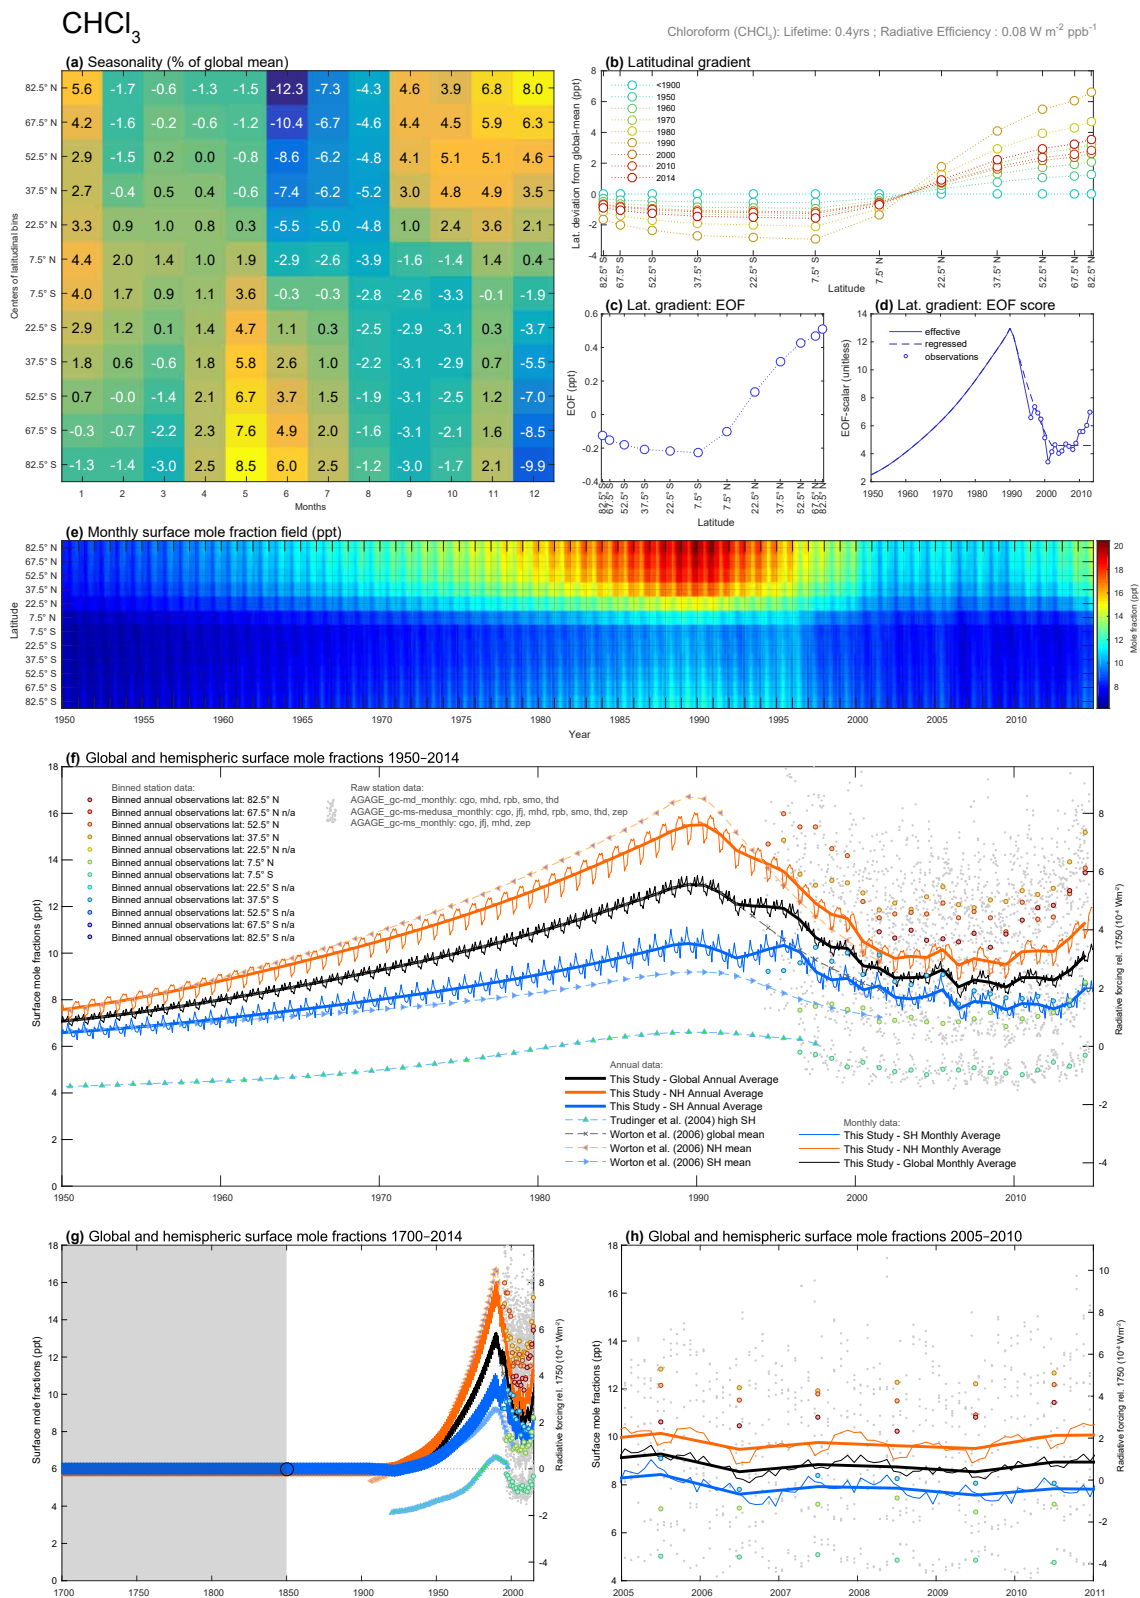Figure S11. CHCl<sub>3</sub> Factsheet

# Halon-1211

Halon-1211 (CBrClF<sub>3</sub>): Lifetime: 16yrs ; Radiative Efficiency : 0.29 W m<sup>-2</sup> ppb<sup>-1</sup>

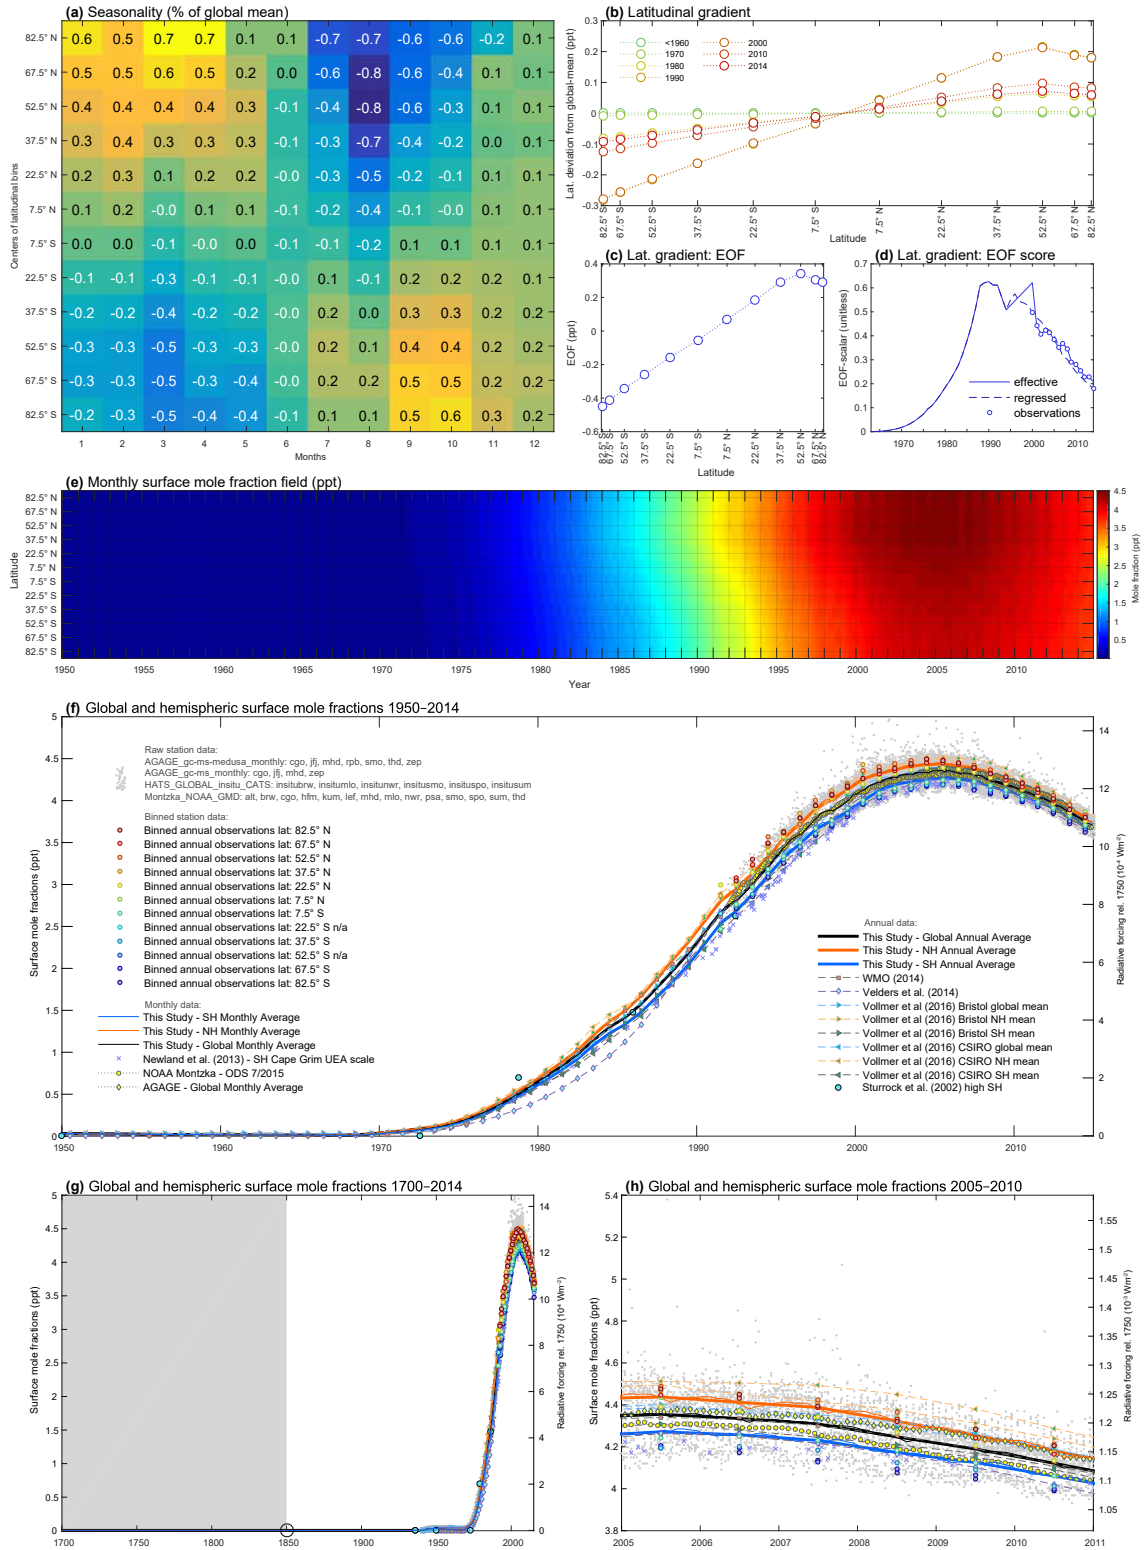

Figure S12. Halon-1211 Factsheet

## Halon-1301

Halon-1301 (CBrF<sub>3</sub>): Lifetime: 65yrs ; Radiative Efficiency : 0.3 W m<sup>-2</sup> ppb<sup>-1</sup>

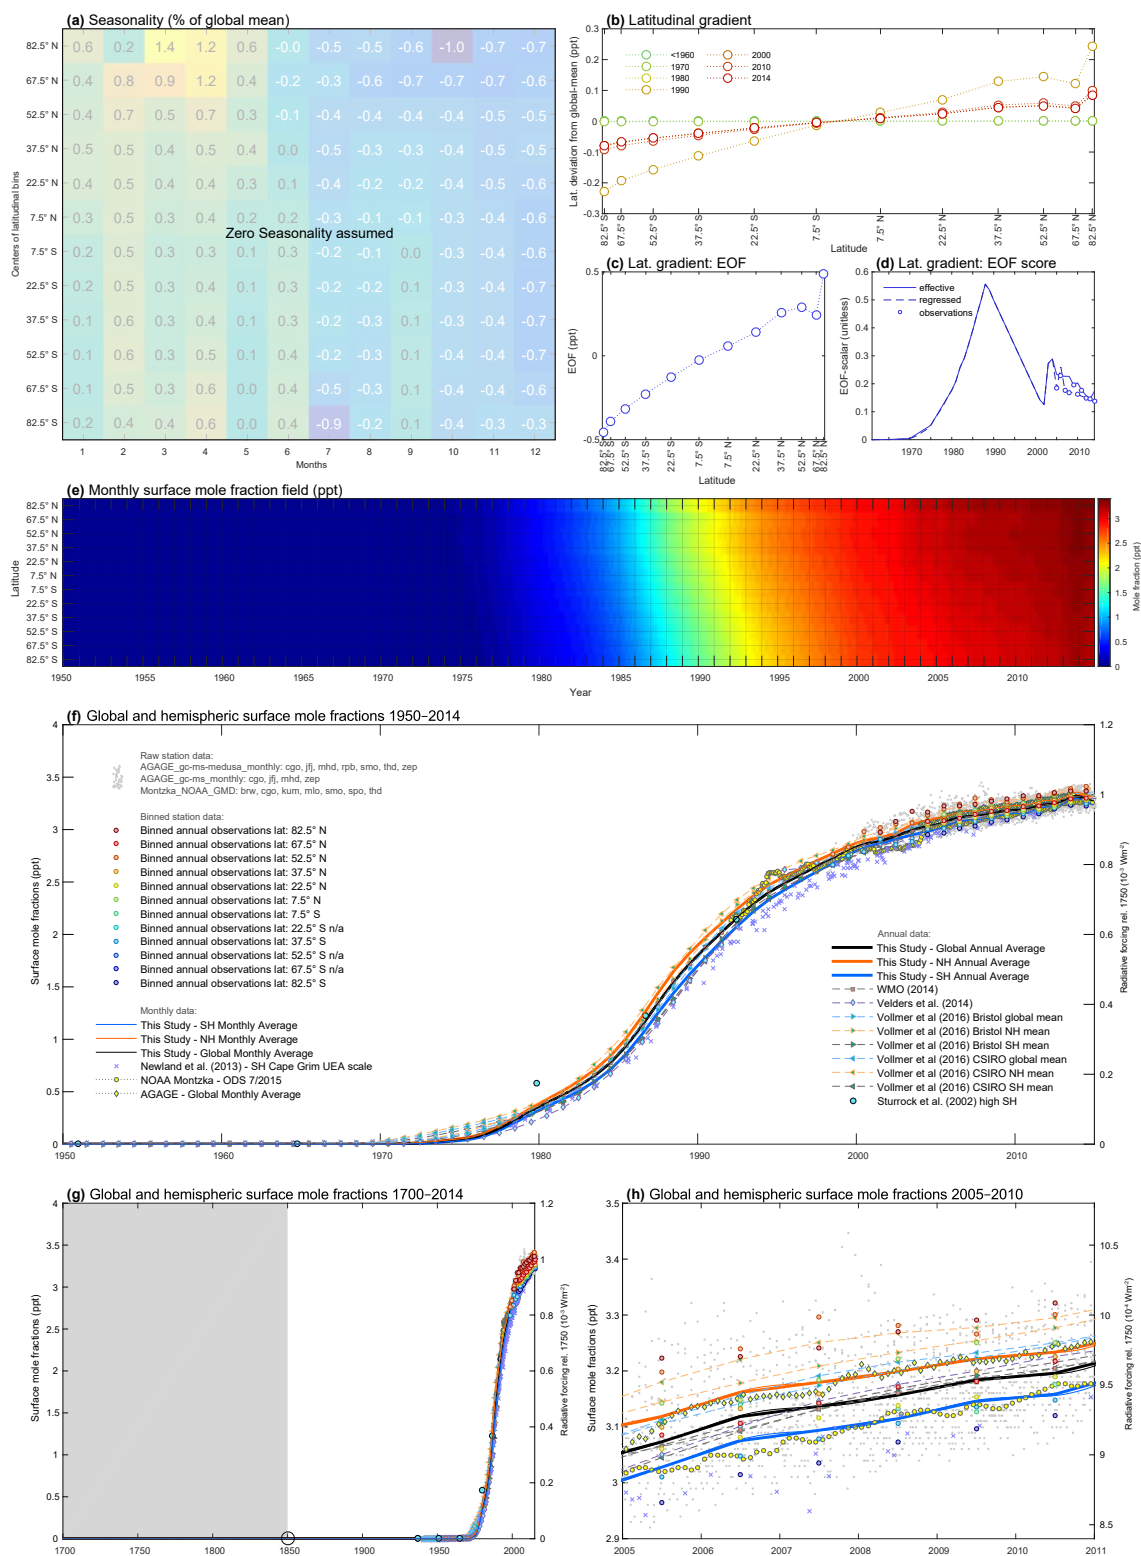

Figure S13. Halon-1301 Factsheet



# Halon-2402

Halon-2402 (CBrF<sub>3</sub>CBrF<sub>2</sub>): Lifetime: 20yrs ; Radiative Efficiency : 0.31 W m<sup>-2</sup> ppb<sup>-1</sup>

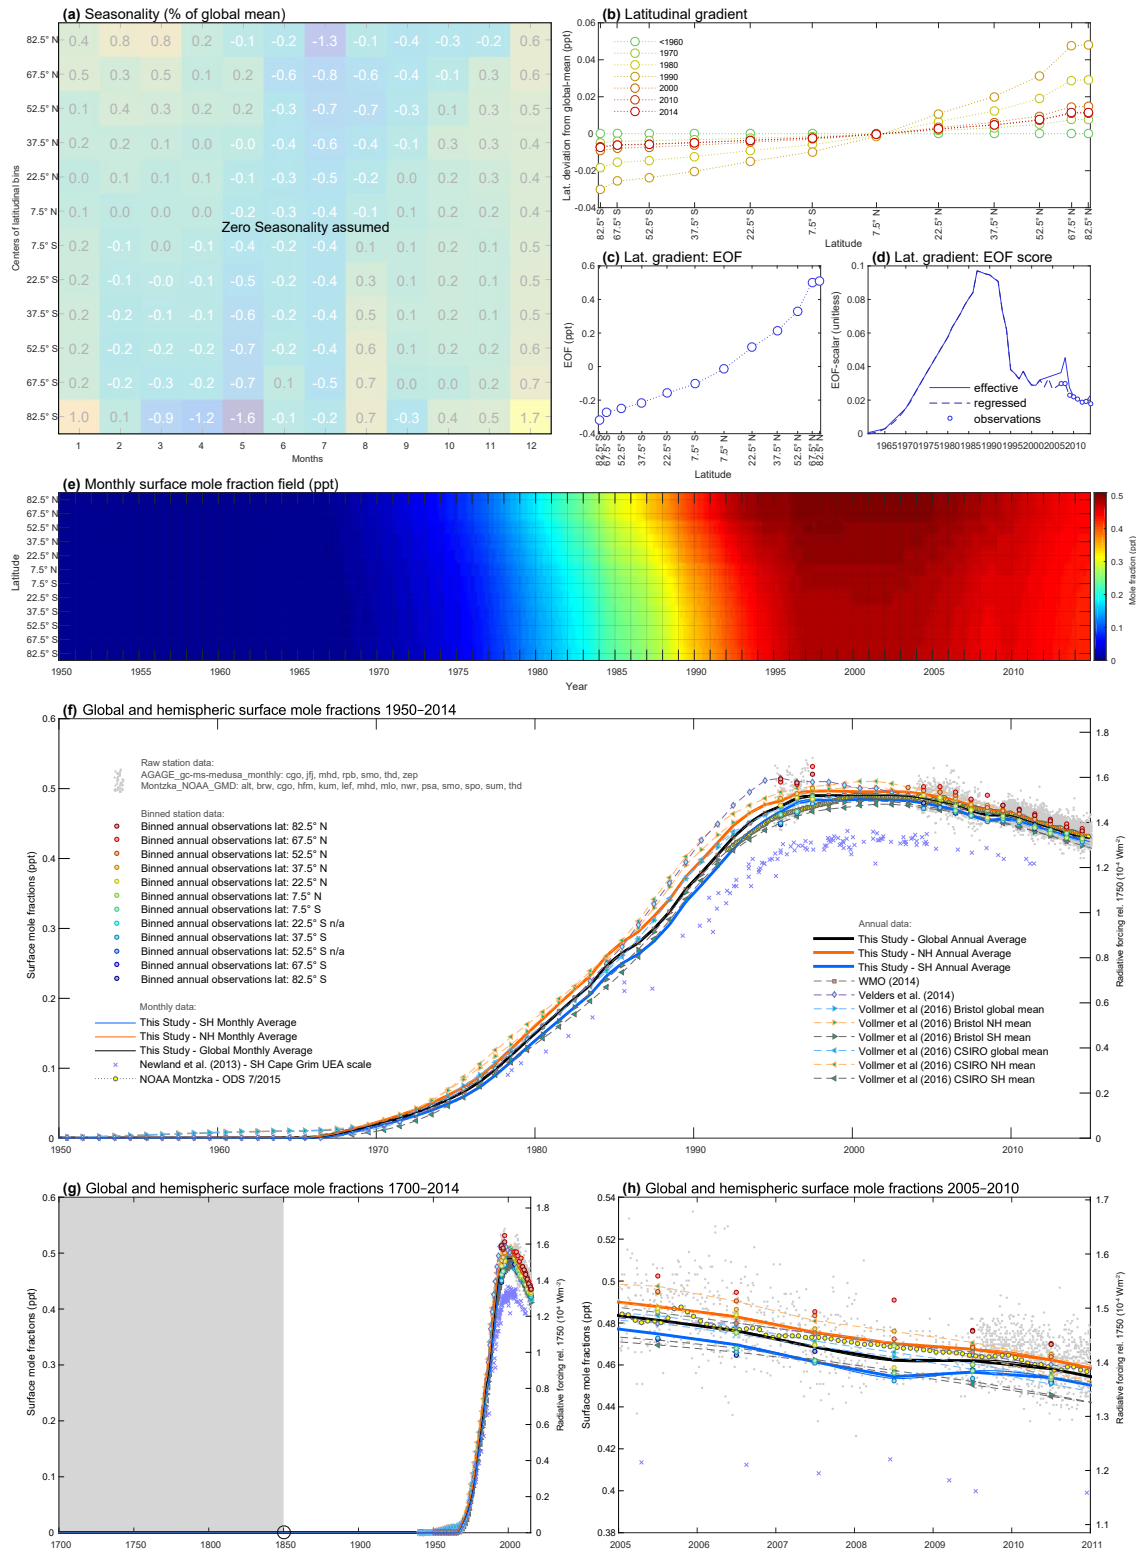

Figure S14. Halon-2402 Factsheet

## HCFC-22

HCFC-22 (CHClF<sub>2</sub>): Lifetime: 11.9yrs ; Radiative Efficiency : 0.21 W m<sup>-2</sup> ppb<sup>-1</sup>

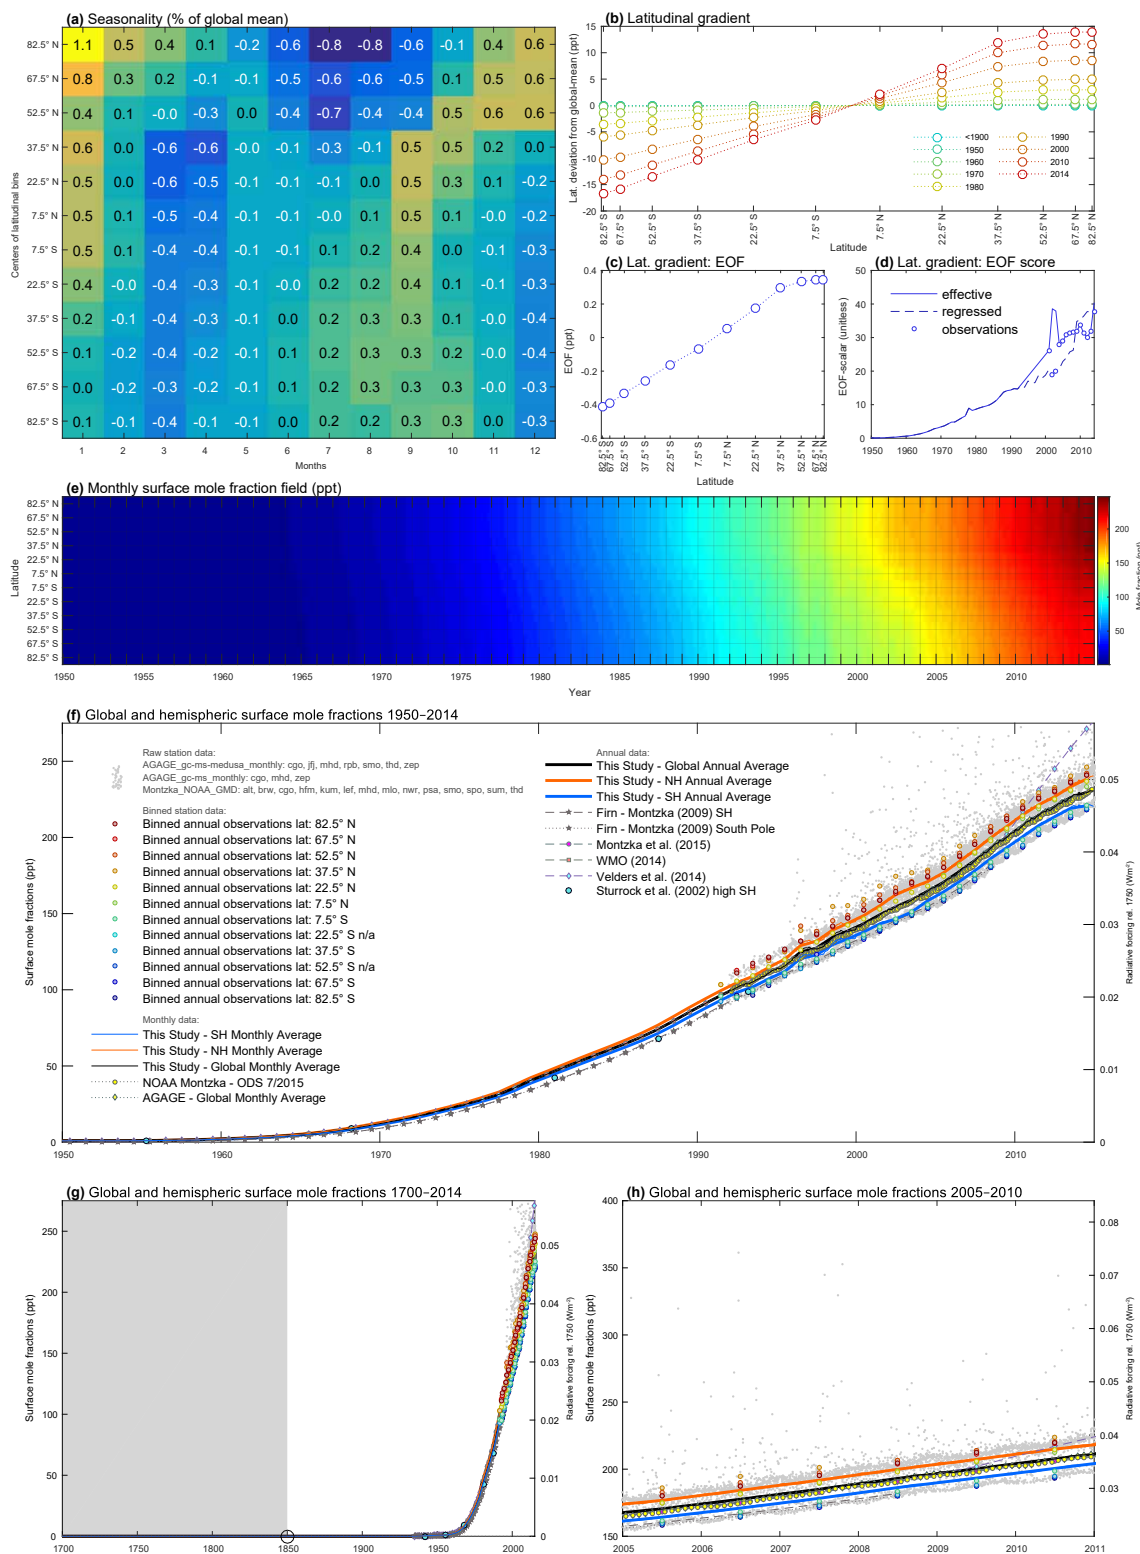

Figure S15. HCFC-22 Factsheet

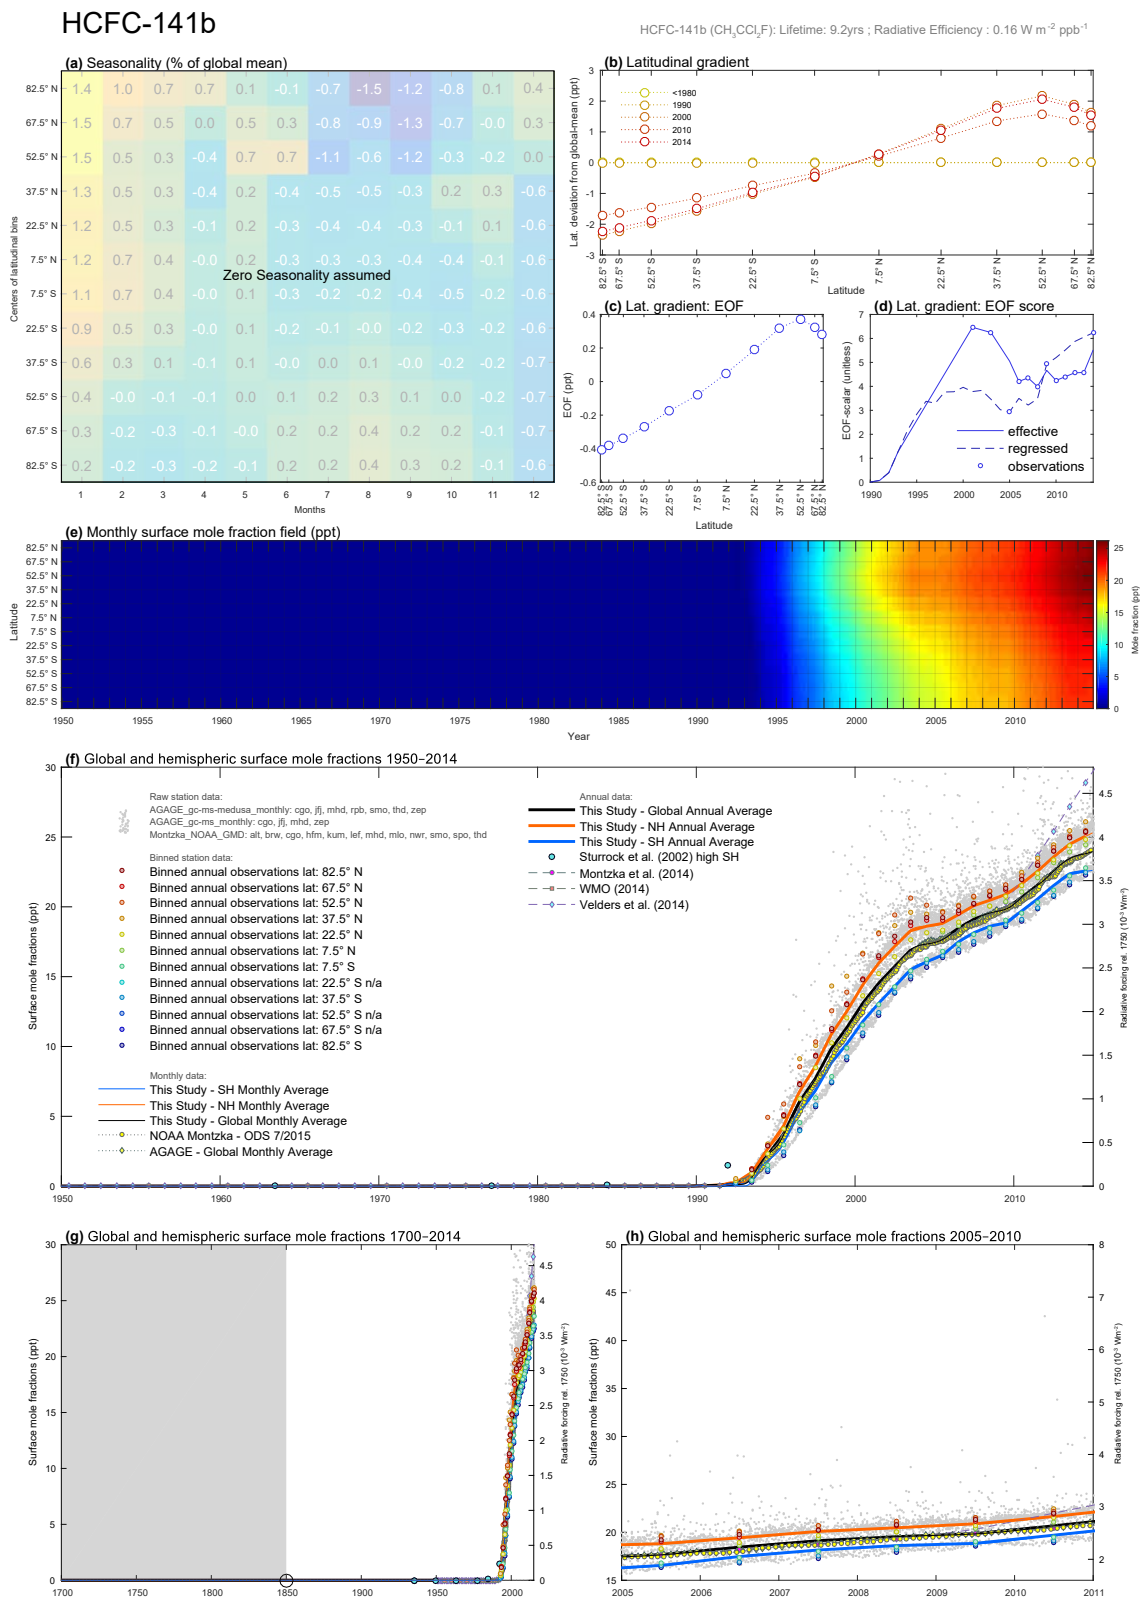

Figure S16. HCFC-141b Factsheet



# HCFC-142b

HCFC-142b ( $\text{CH}_2\text{ClCF}_3$ ): Lifetime: 17.2yrs ; Radiative Efficiency :  $0.19 \text{ W m}^{-2} \text{ ppb}^{-1}$

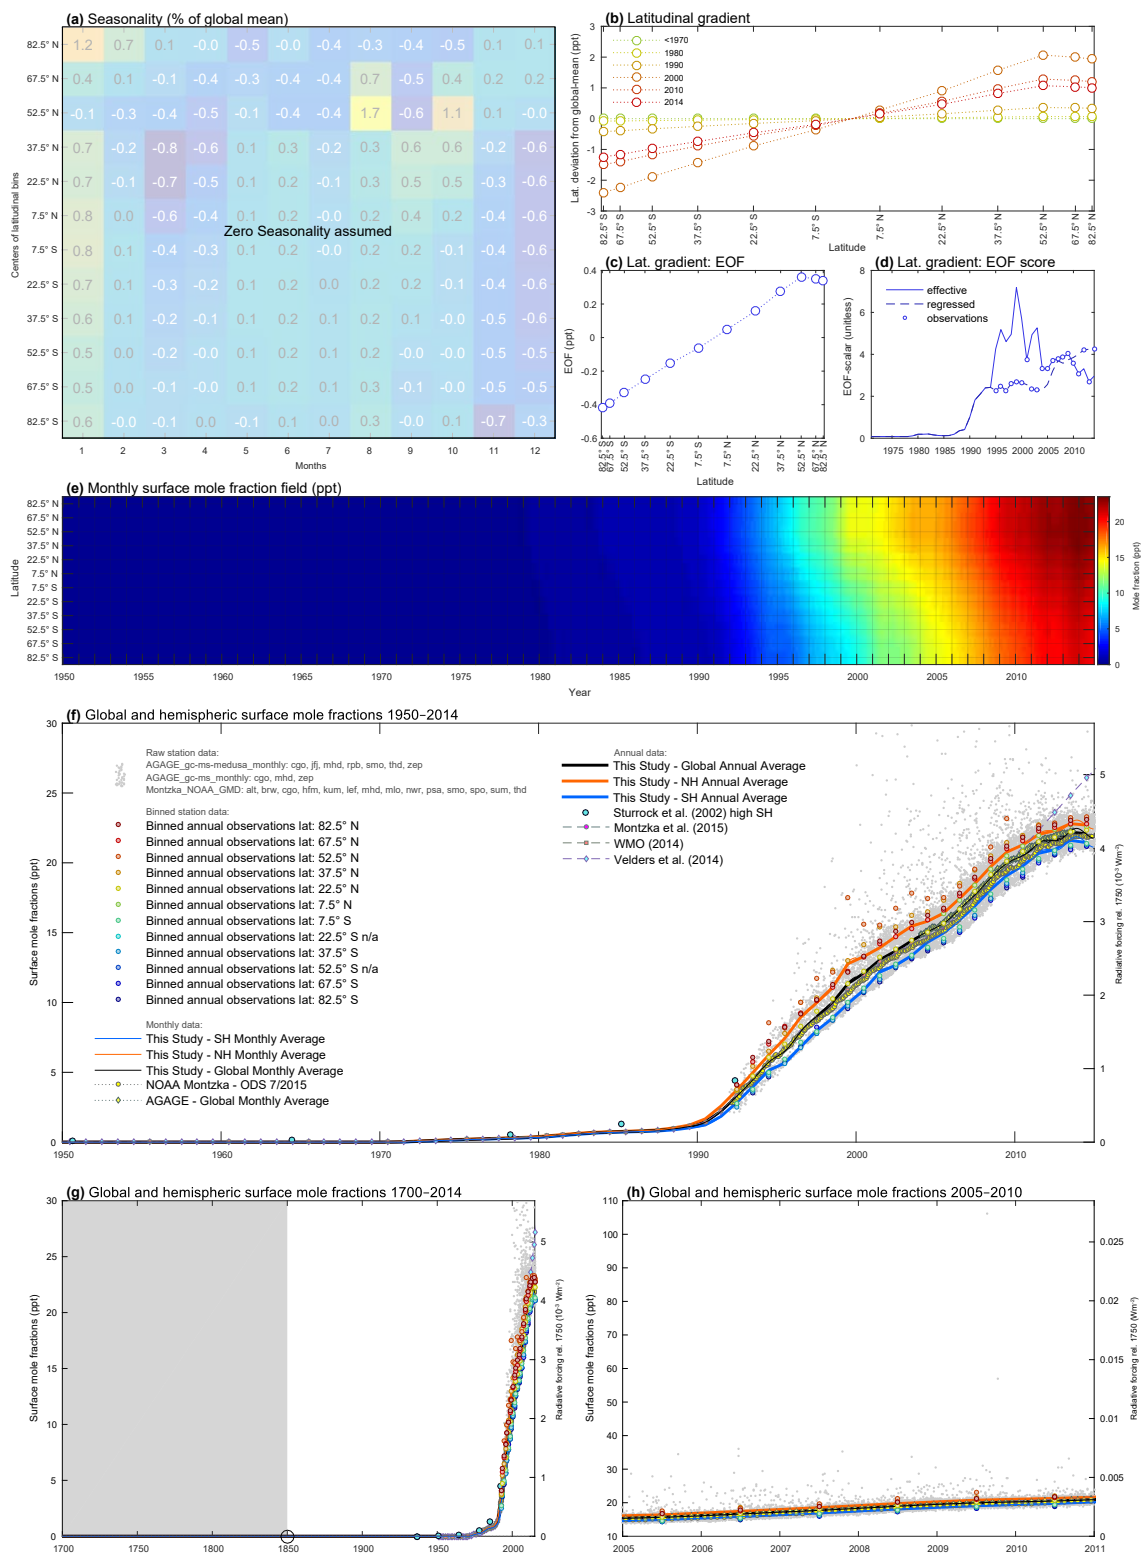

Figure S17. HCFC-142b Factsheet

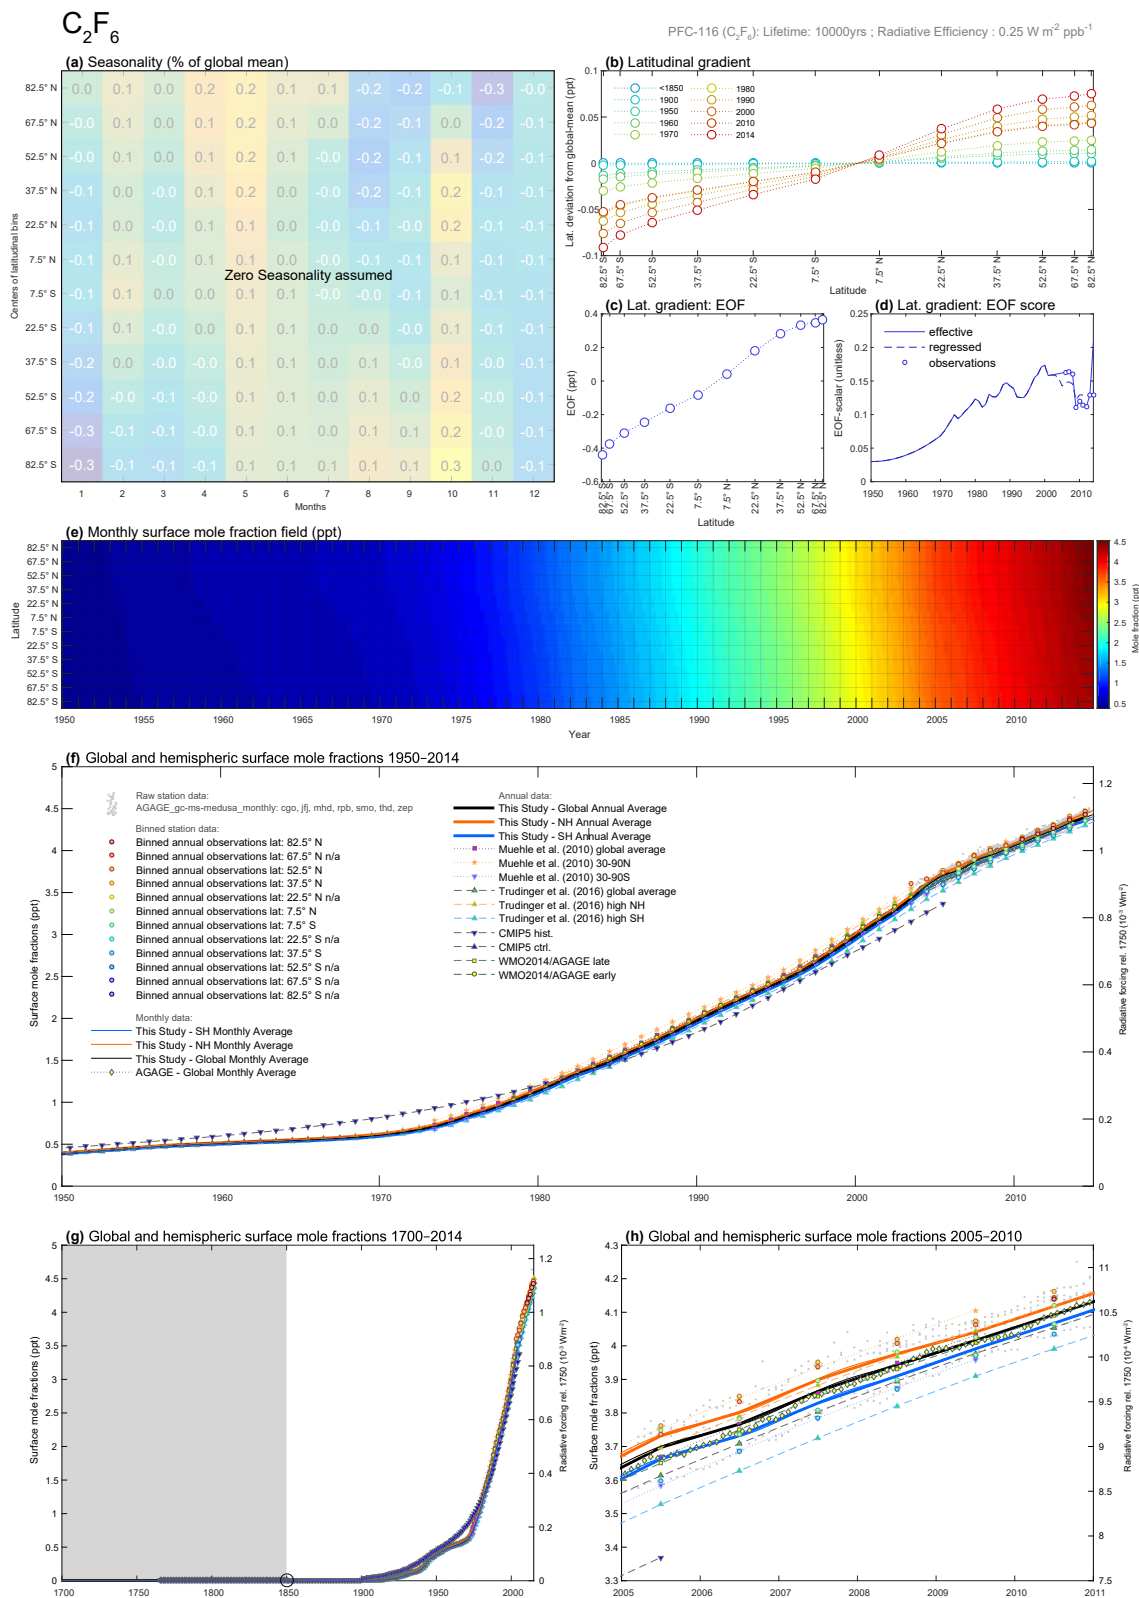Figure S18.  $C_2F_6$  Factsheet

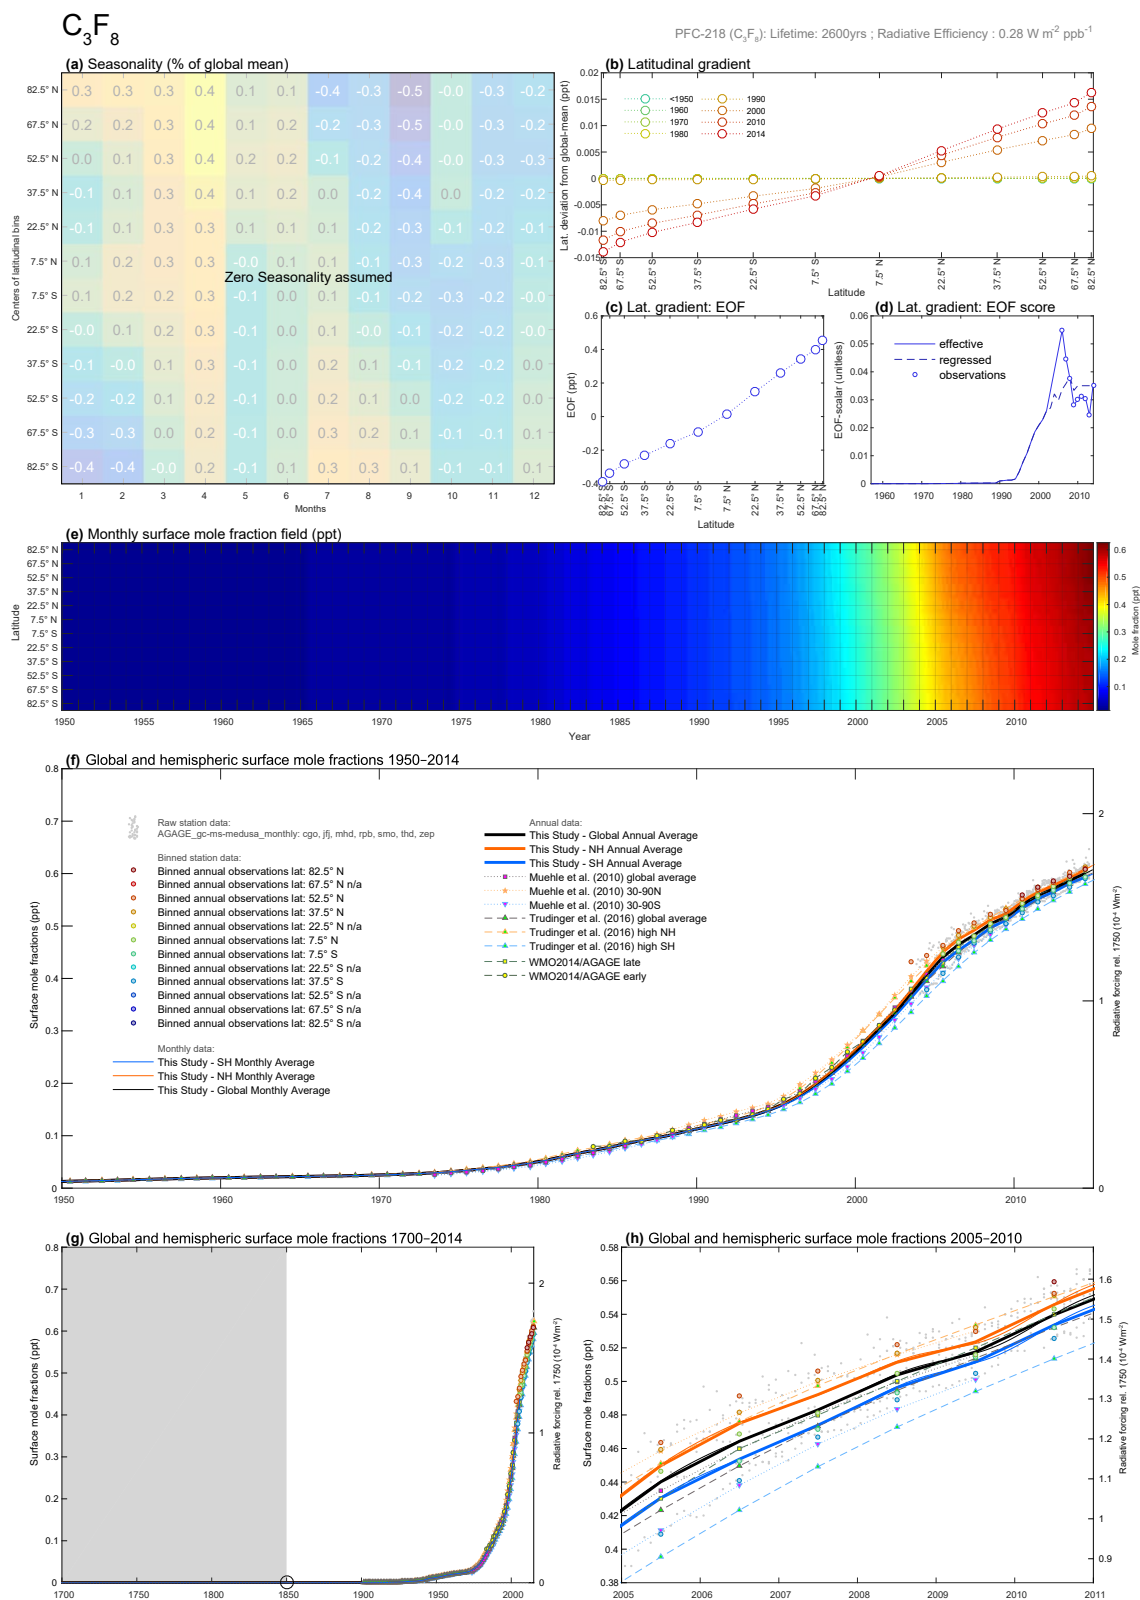Figure S19. C<sub>3</sub>F<sub>8</sub> Factsheet

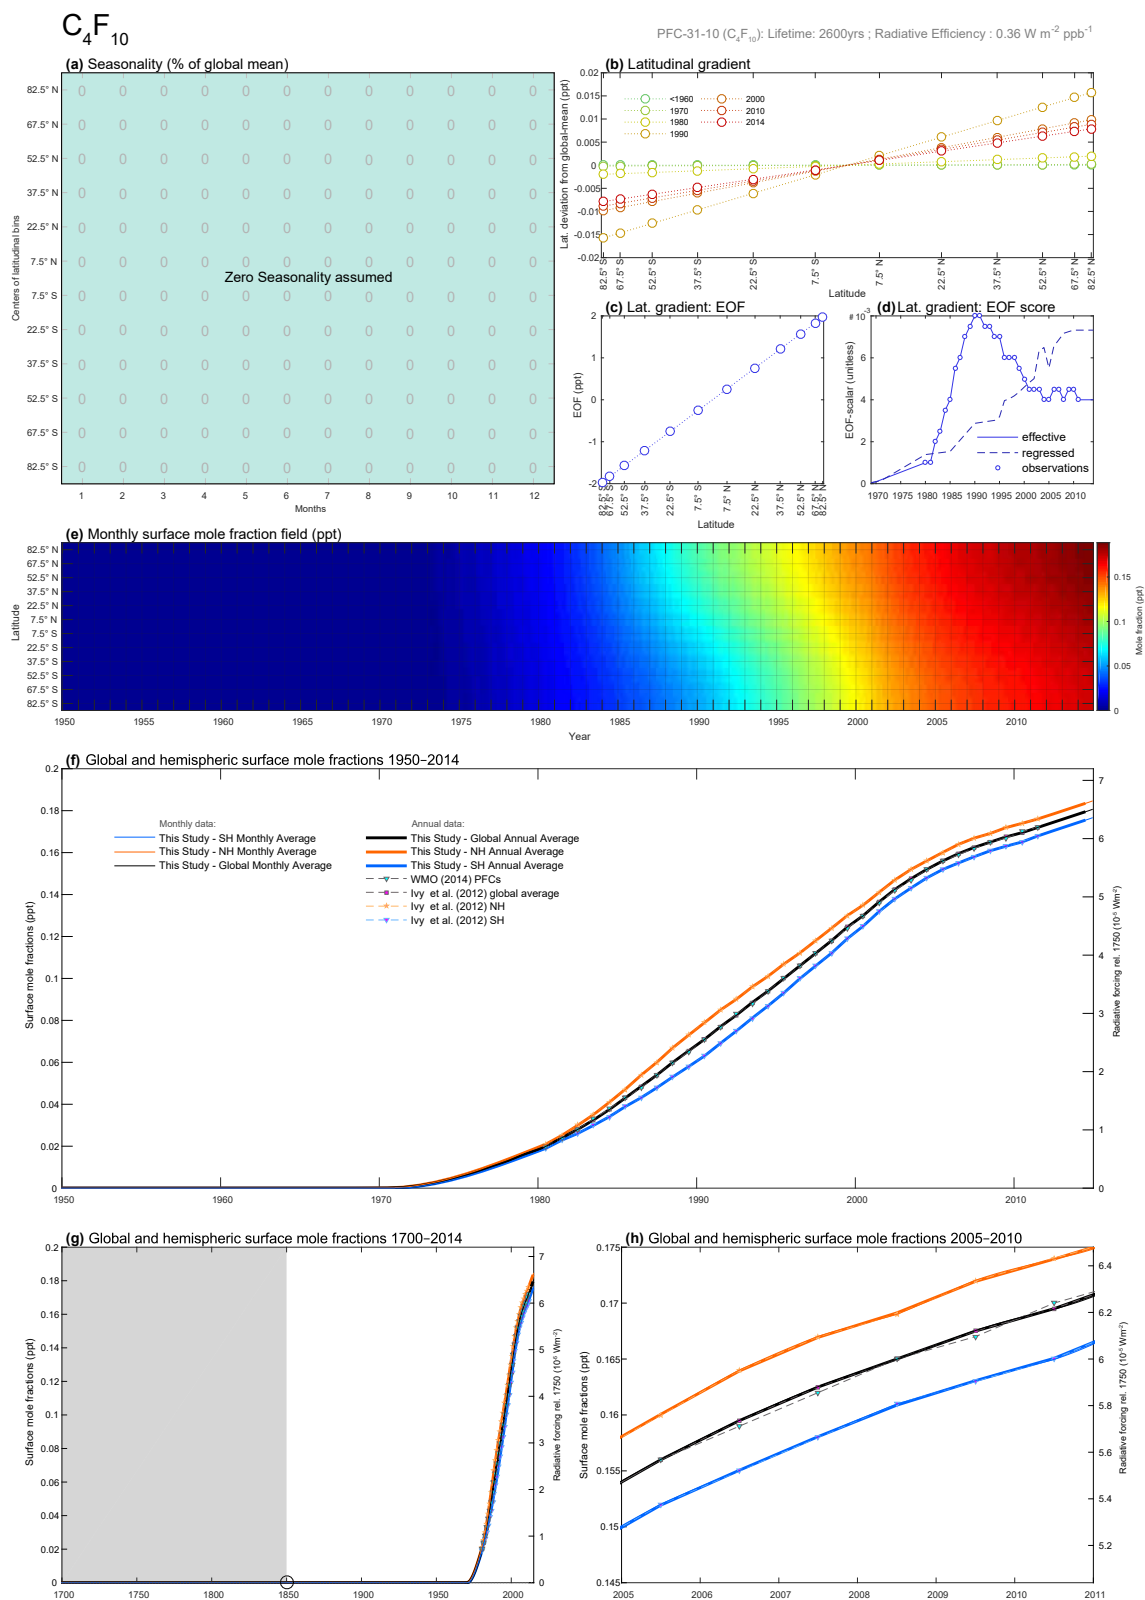Figure S20. C<sub>4</sub>F<sub>10</sub> Factsheet

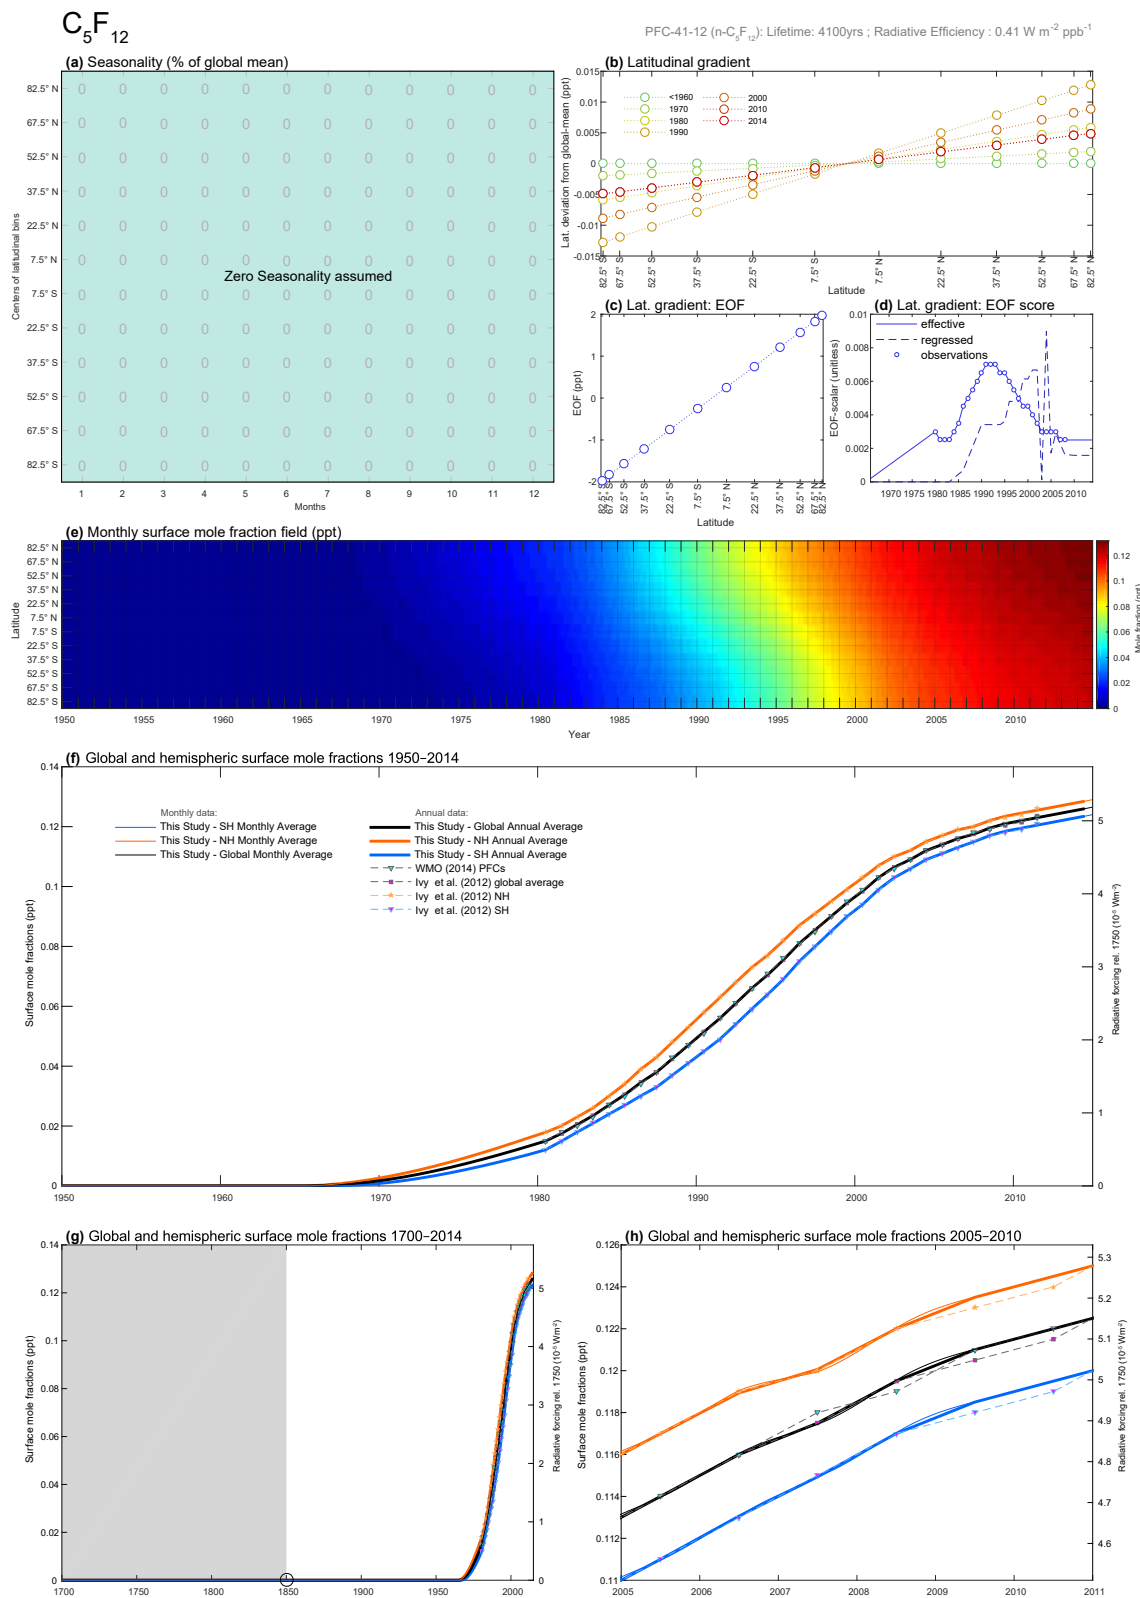Figure S21. C<sub>5</sub>F<sub>12</sub> Factsheet

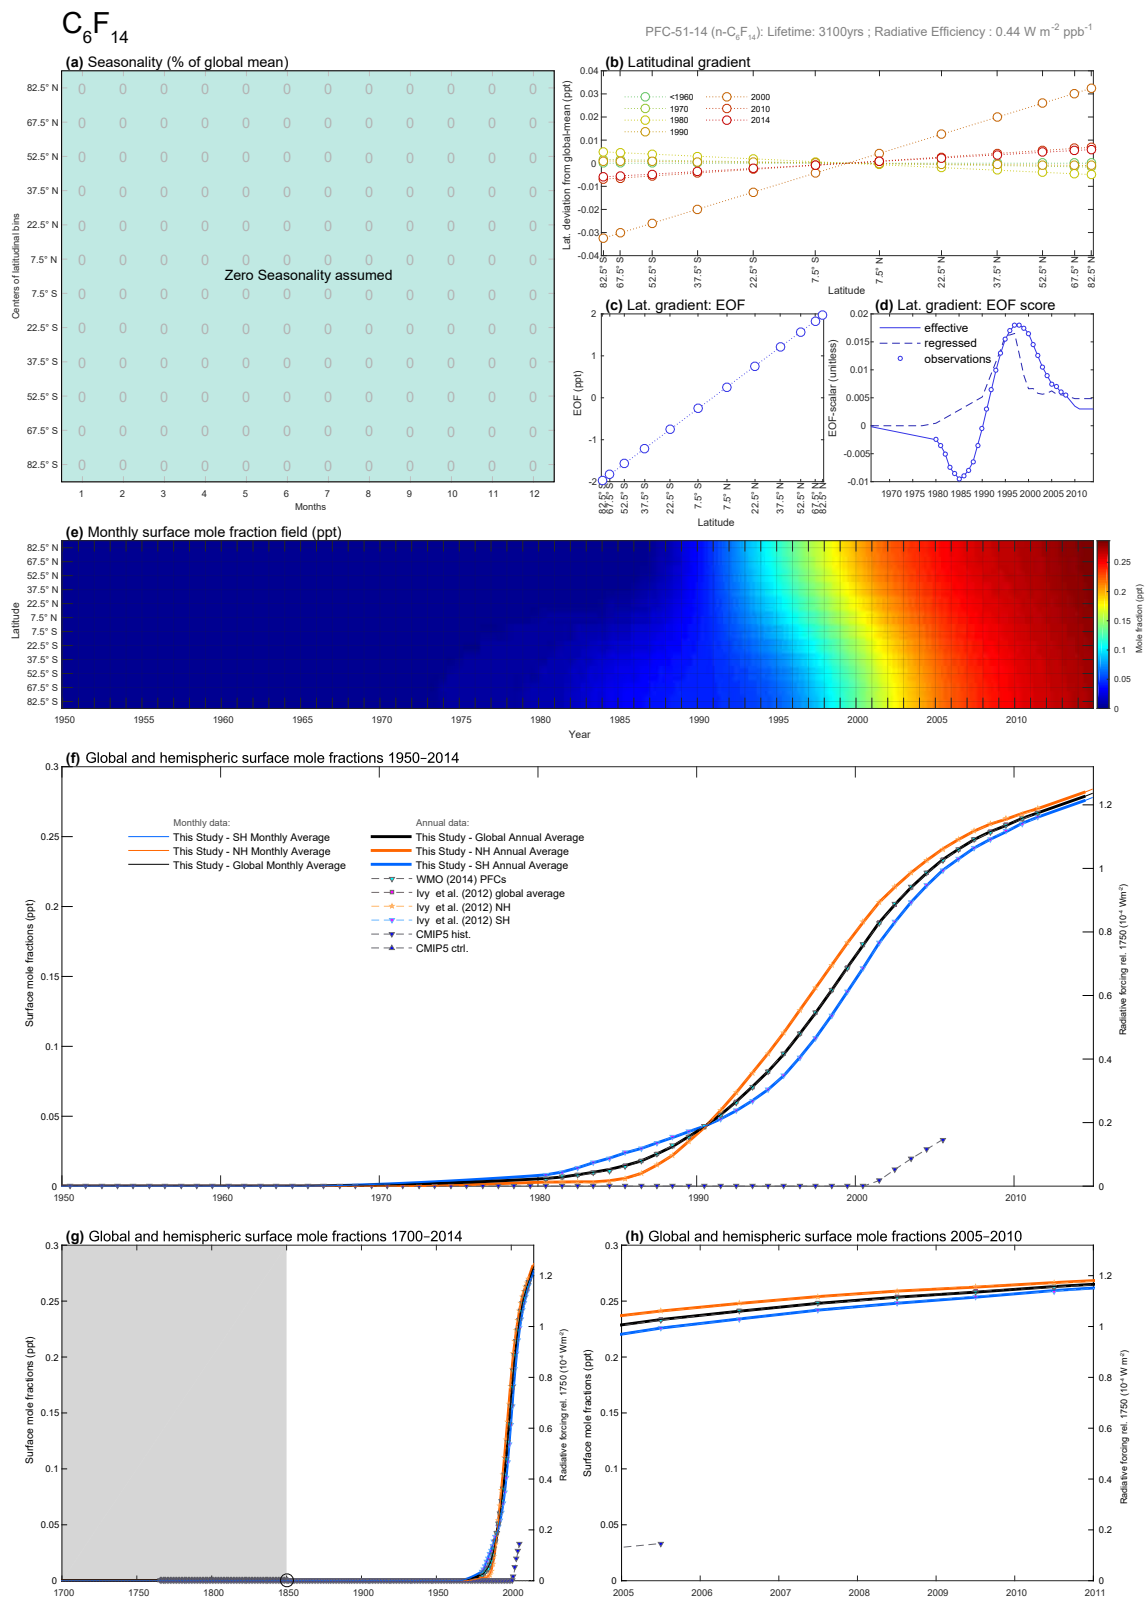Figure S22. C<sub>6</sub>F<sub>14</sub> Factsheet

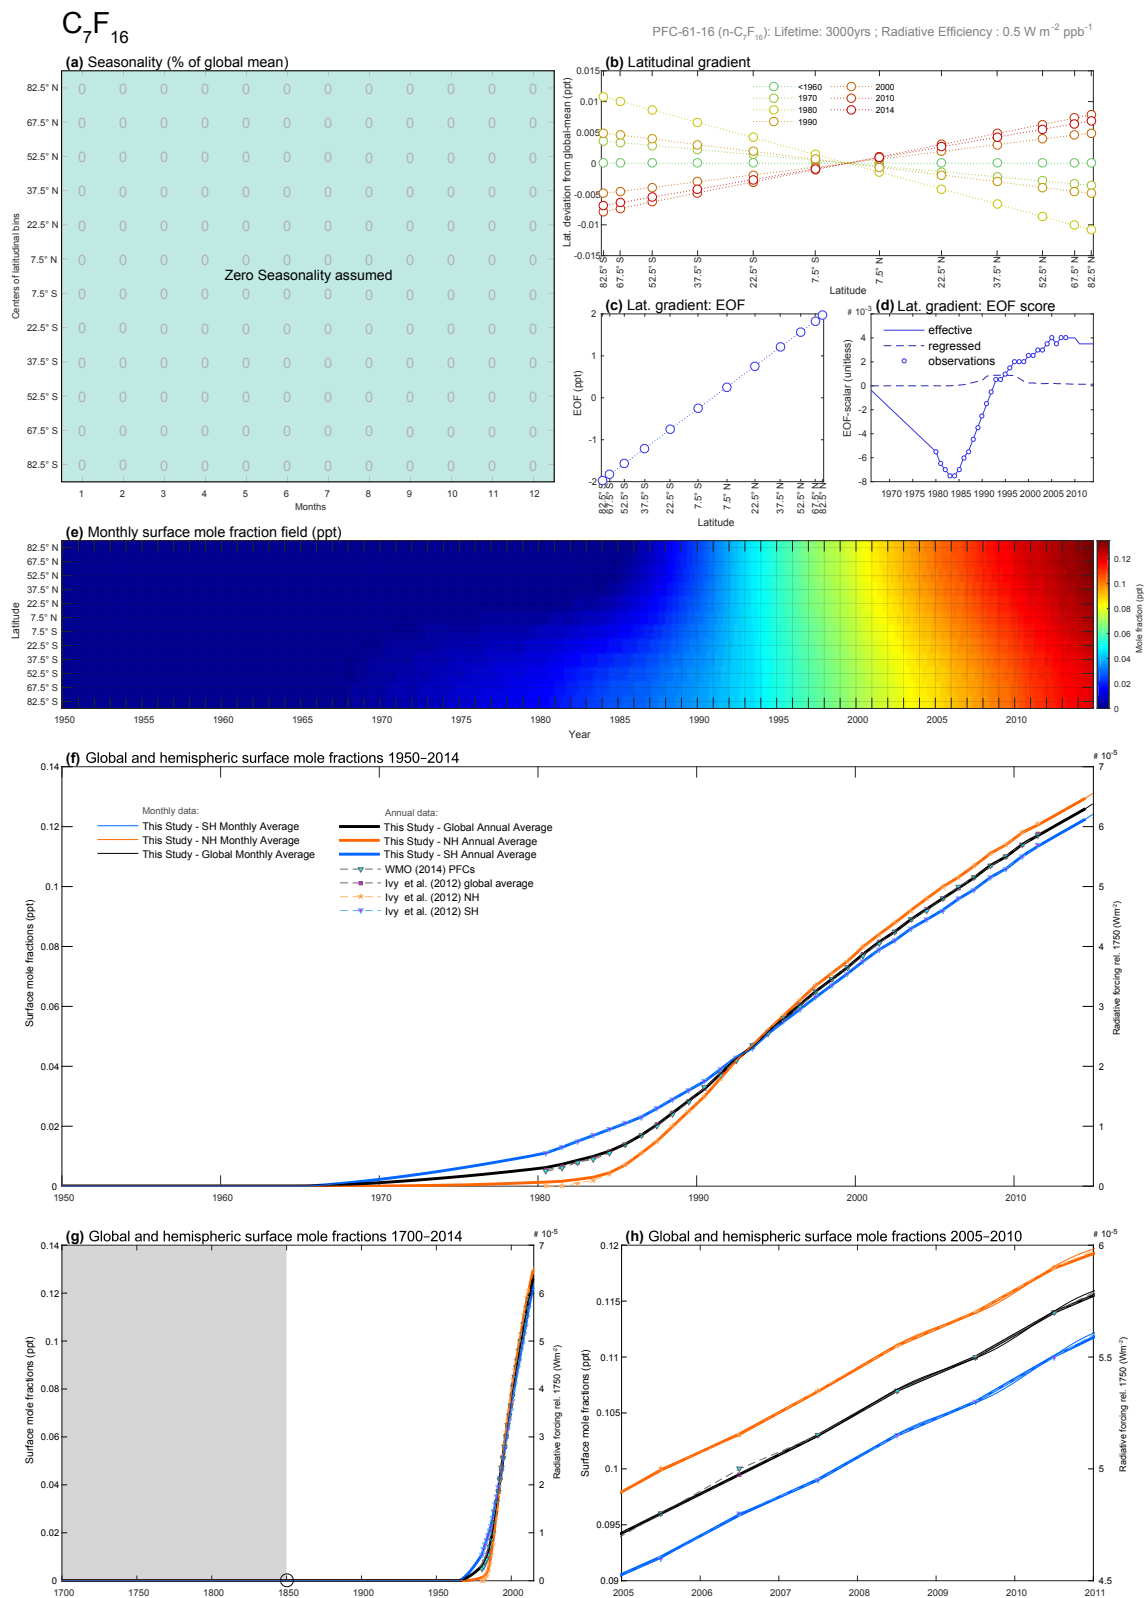Figure S23. C<sub>7</sub>F<sub>16</sub> Factsheet

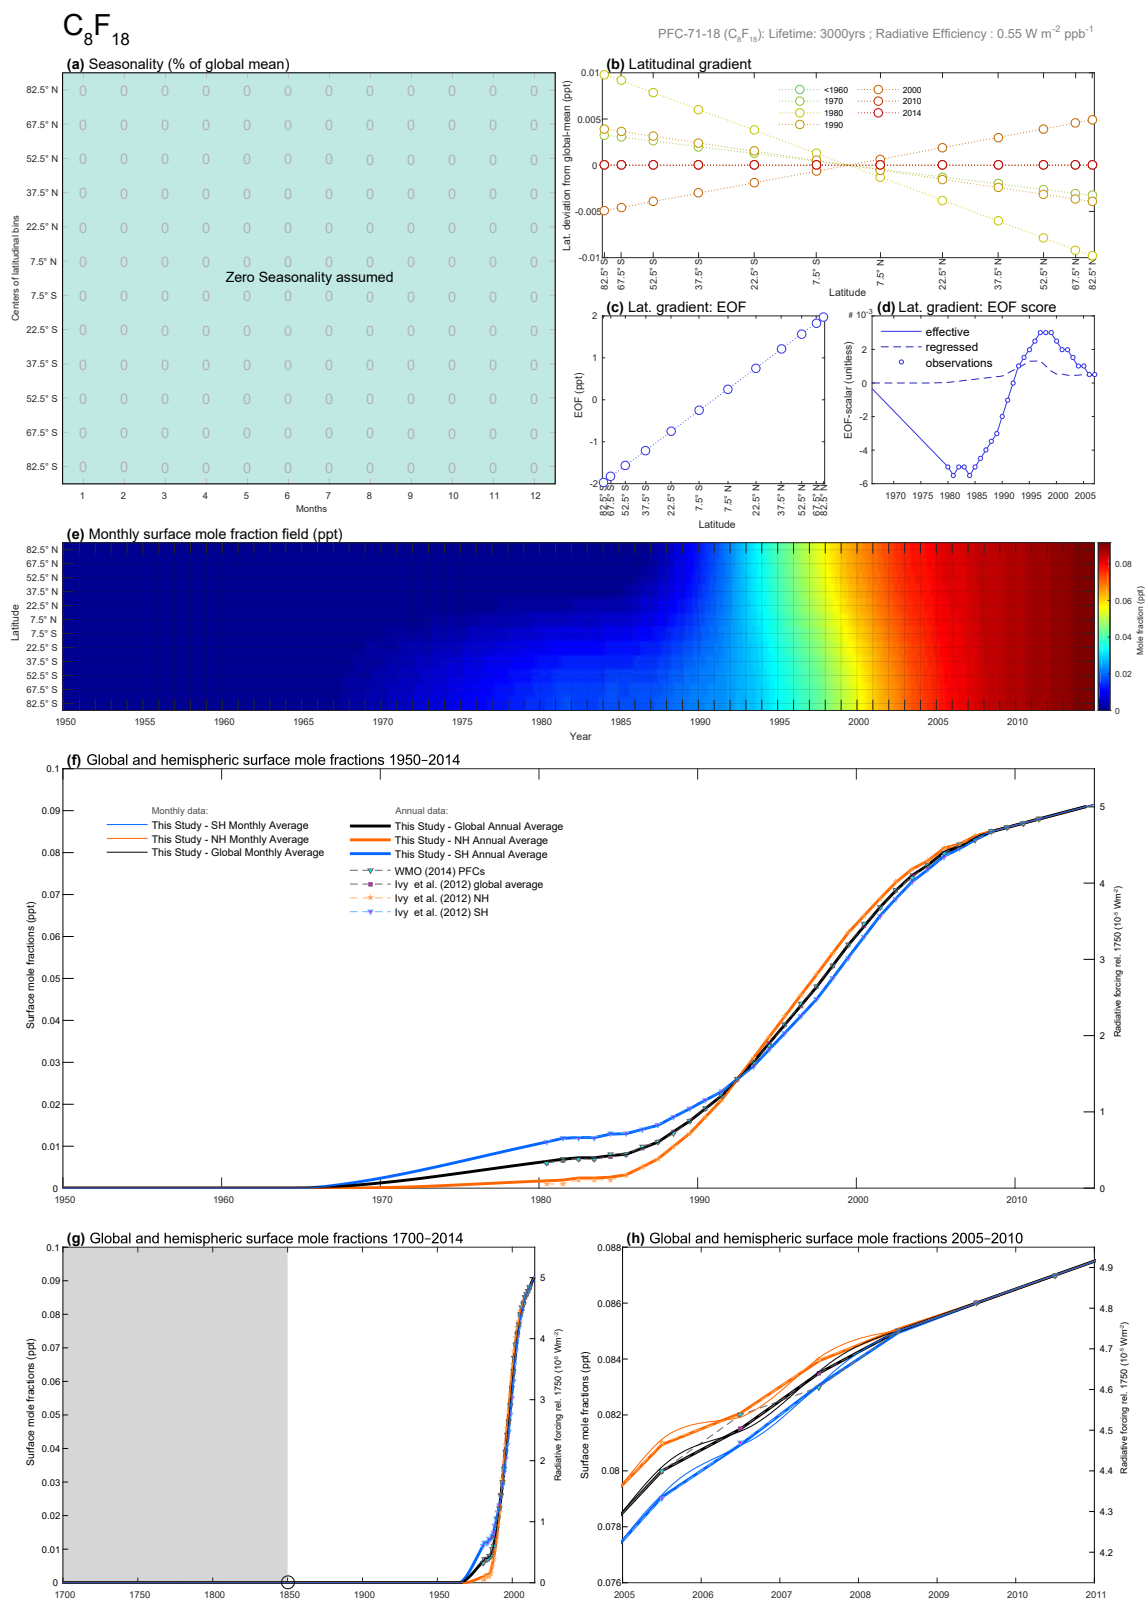Figure S24. C<sub>8</sub>F<sub>18</sub> Factsheet



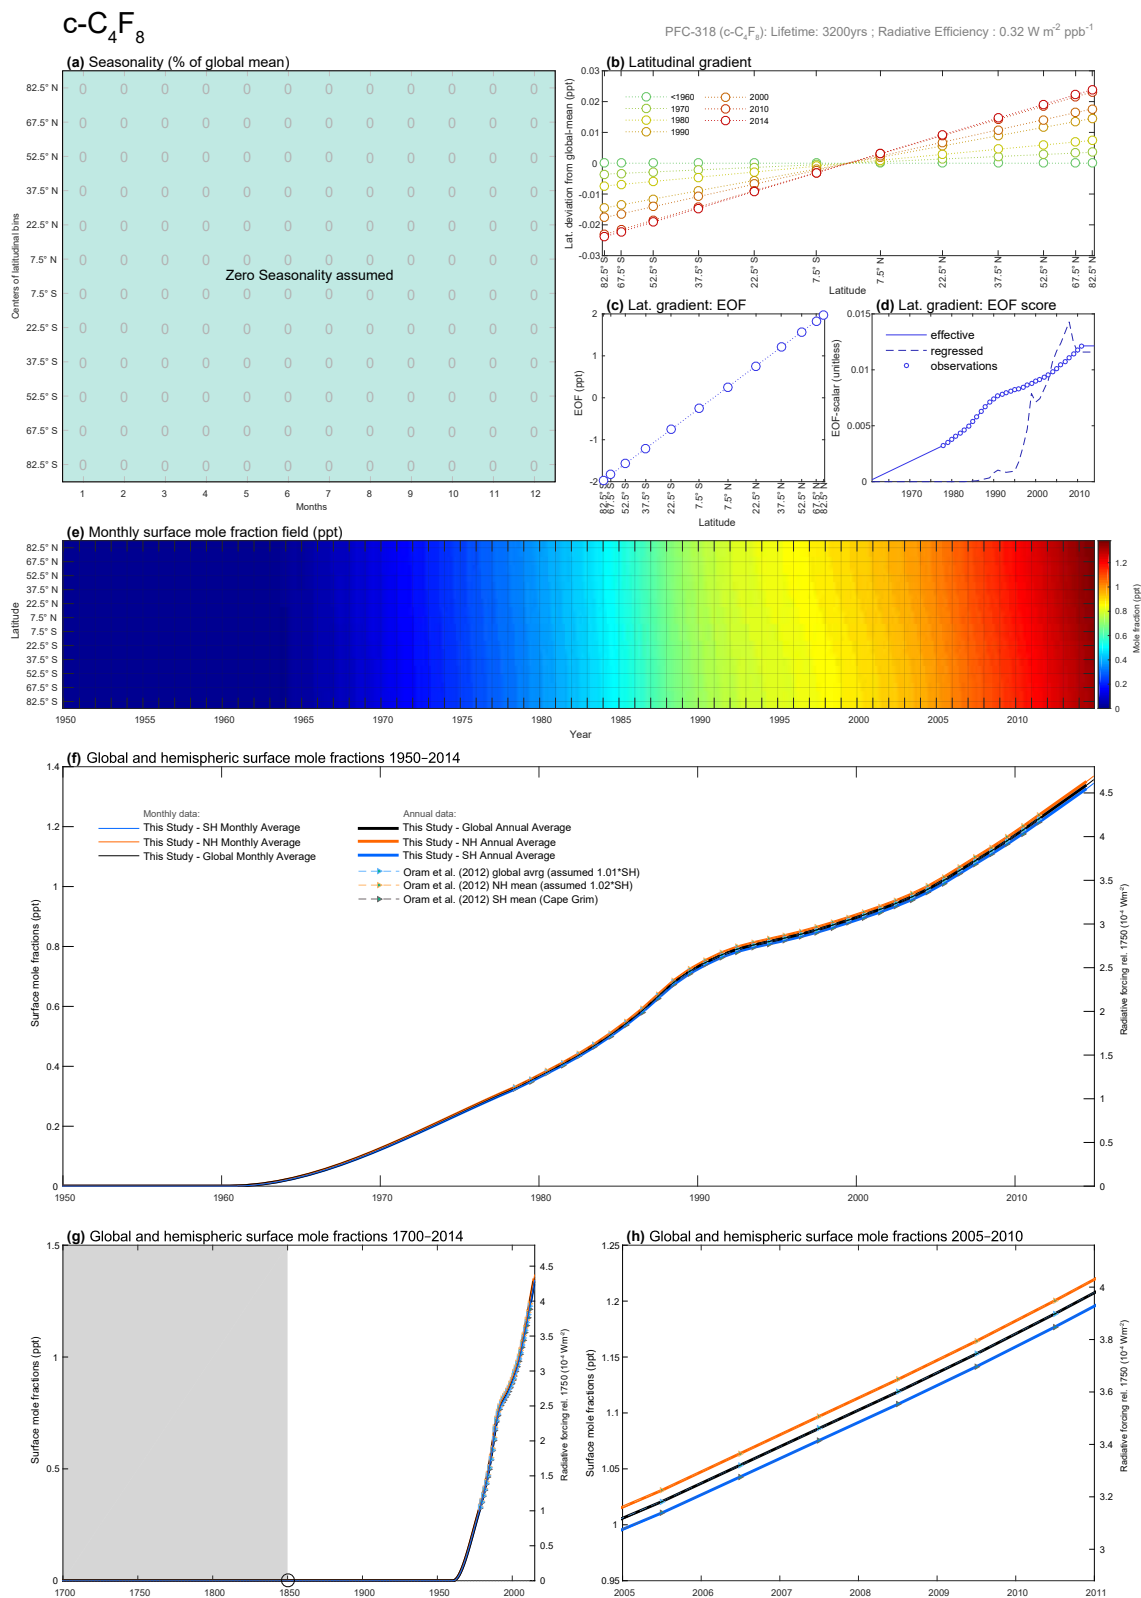Figure S25. c-C<sub>4</sub>F<sub>8</sub> Factsheet

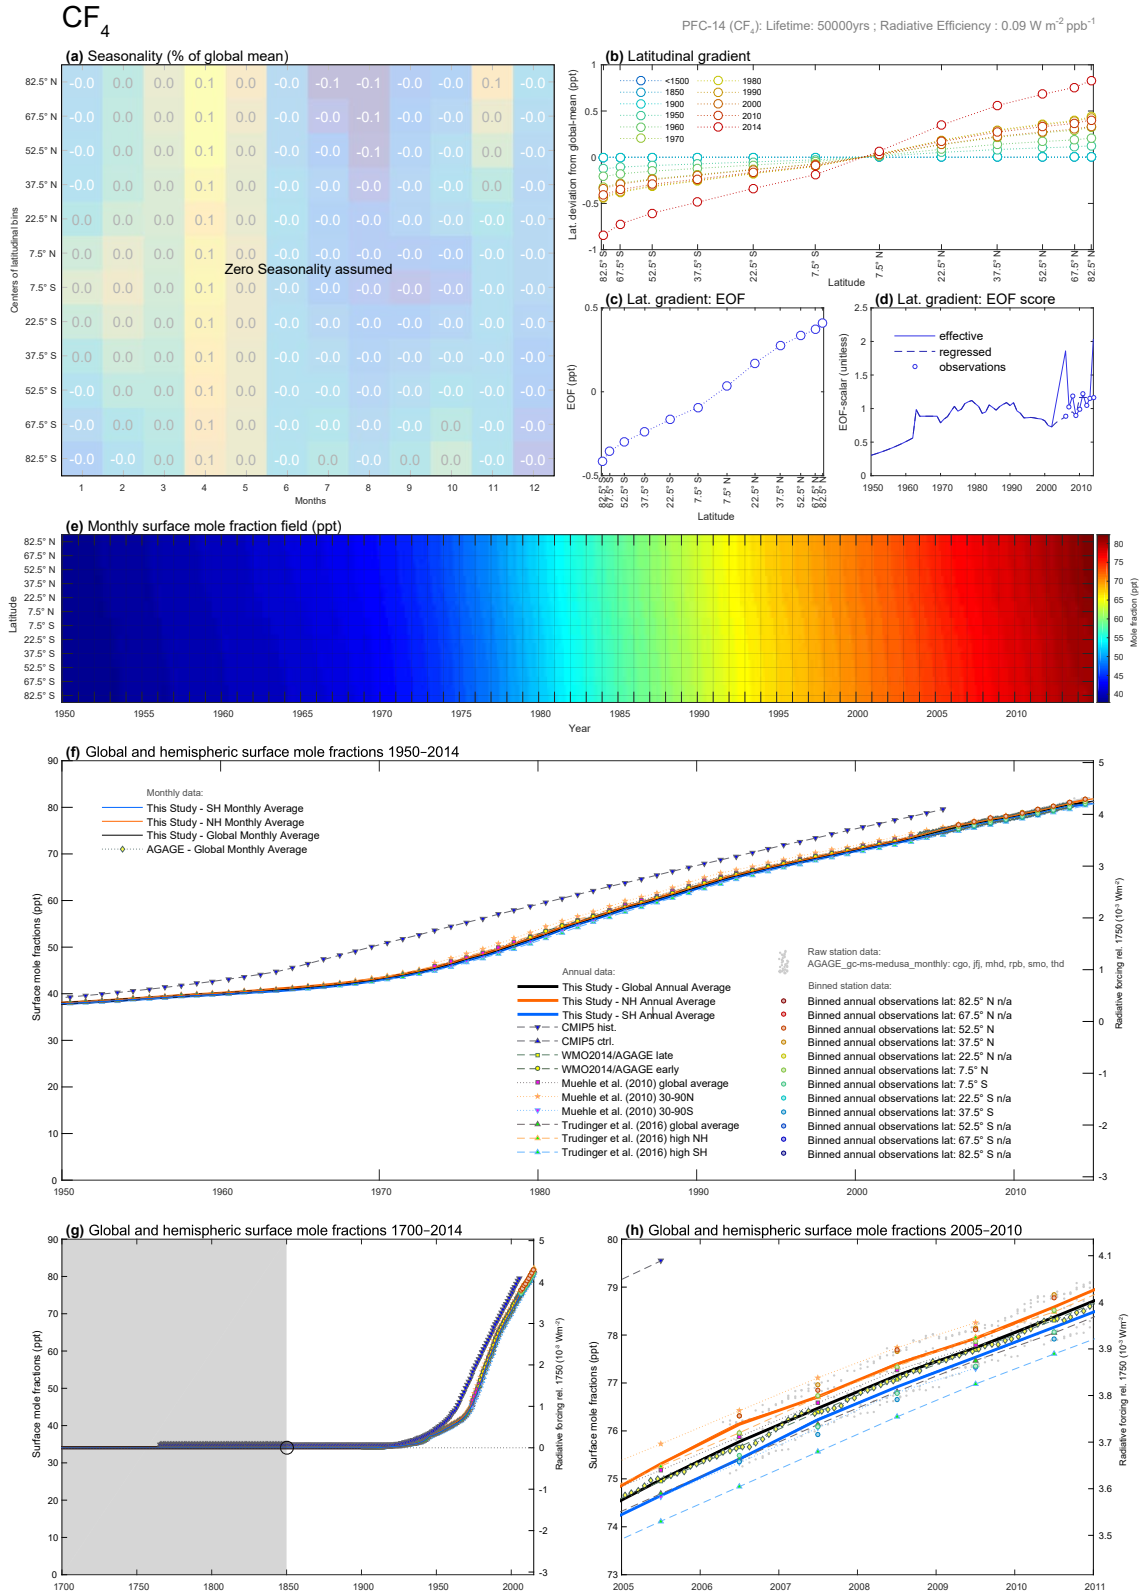Figure S26. CF<sub>4</sub> Factsheet

## HFC-23

HFC-23 (CHF<sub>3</sub>): Lifetime: 222yrs ; Radiative Efficiency : 0.18 W m<sup>-2</sup> ppb<sup>-1</sup>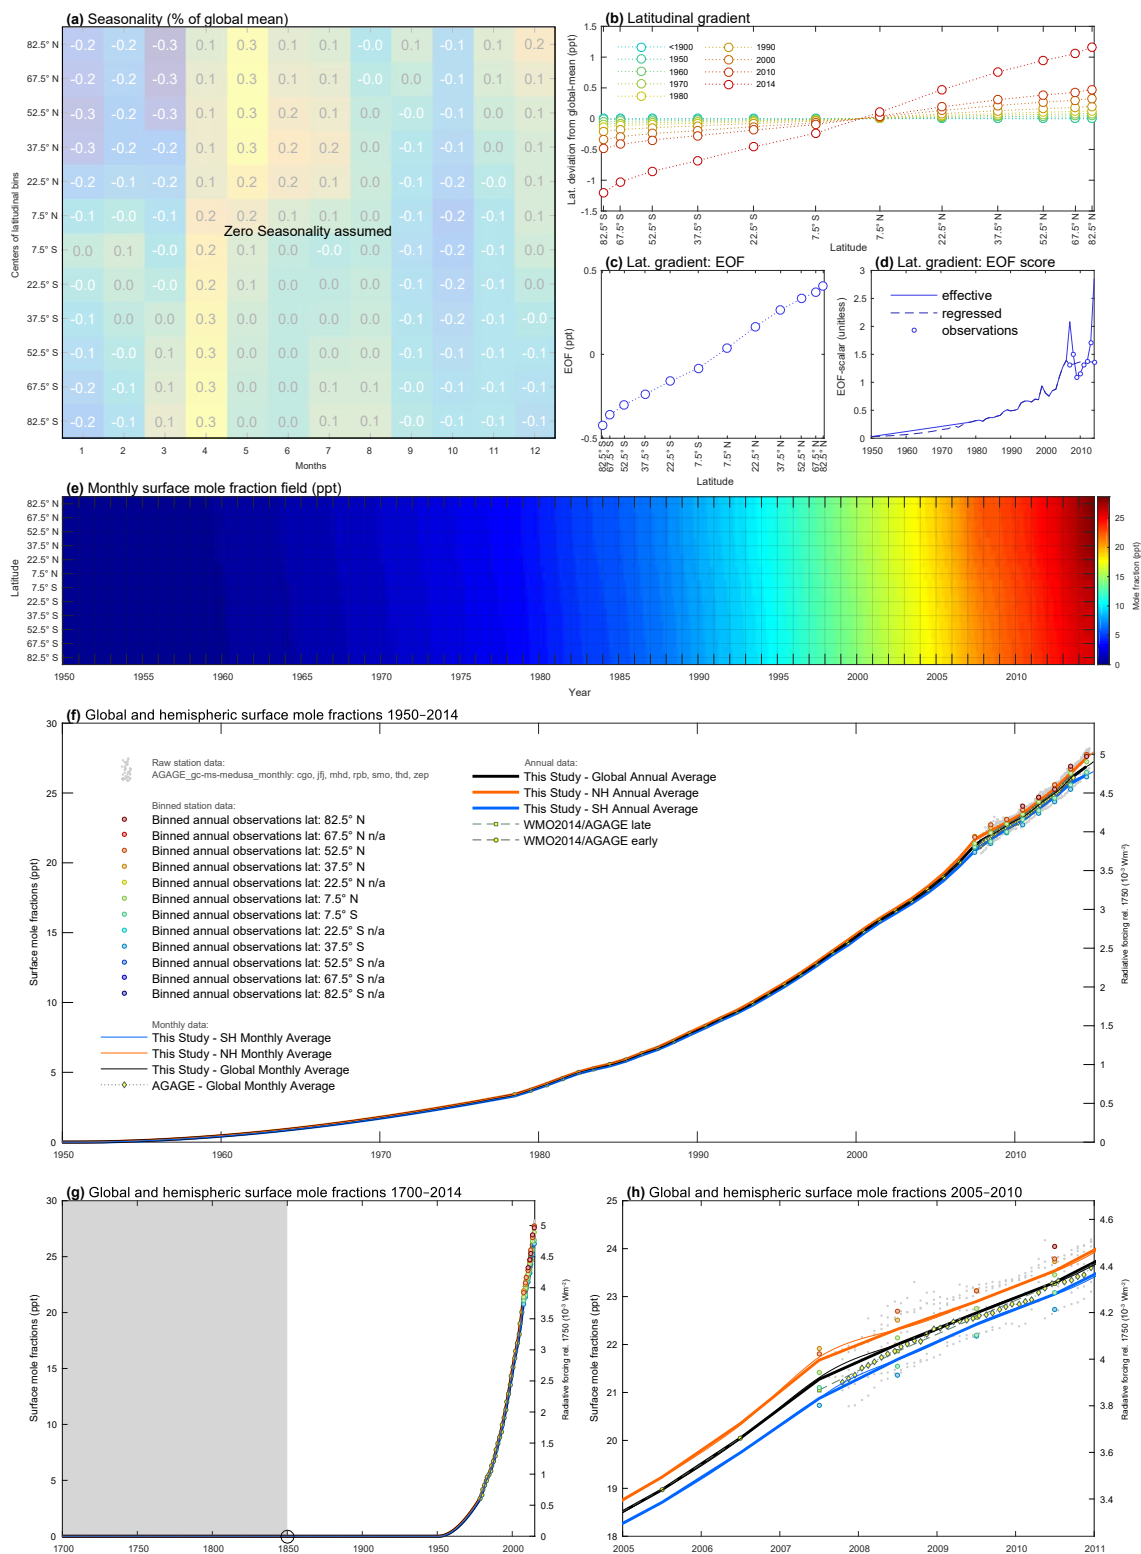

Figure S27. HFC-23 Factsheet

## HFC-32

HFC-32 ( $\text{CH}_2\text{F}_2$ ): Lifetime: 5.2yrs ; Radiative Efficiency :  $0.11 \text{ W m}^{-2} \text{ ppb}^{-1}$ 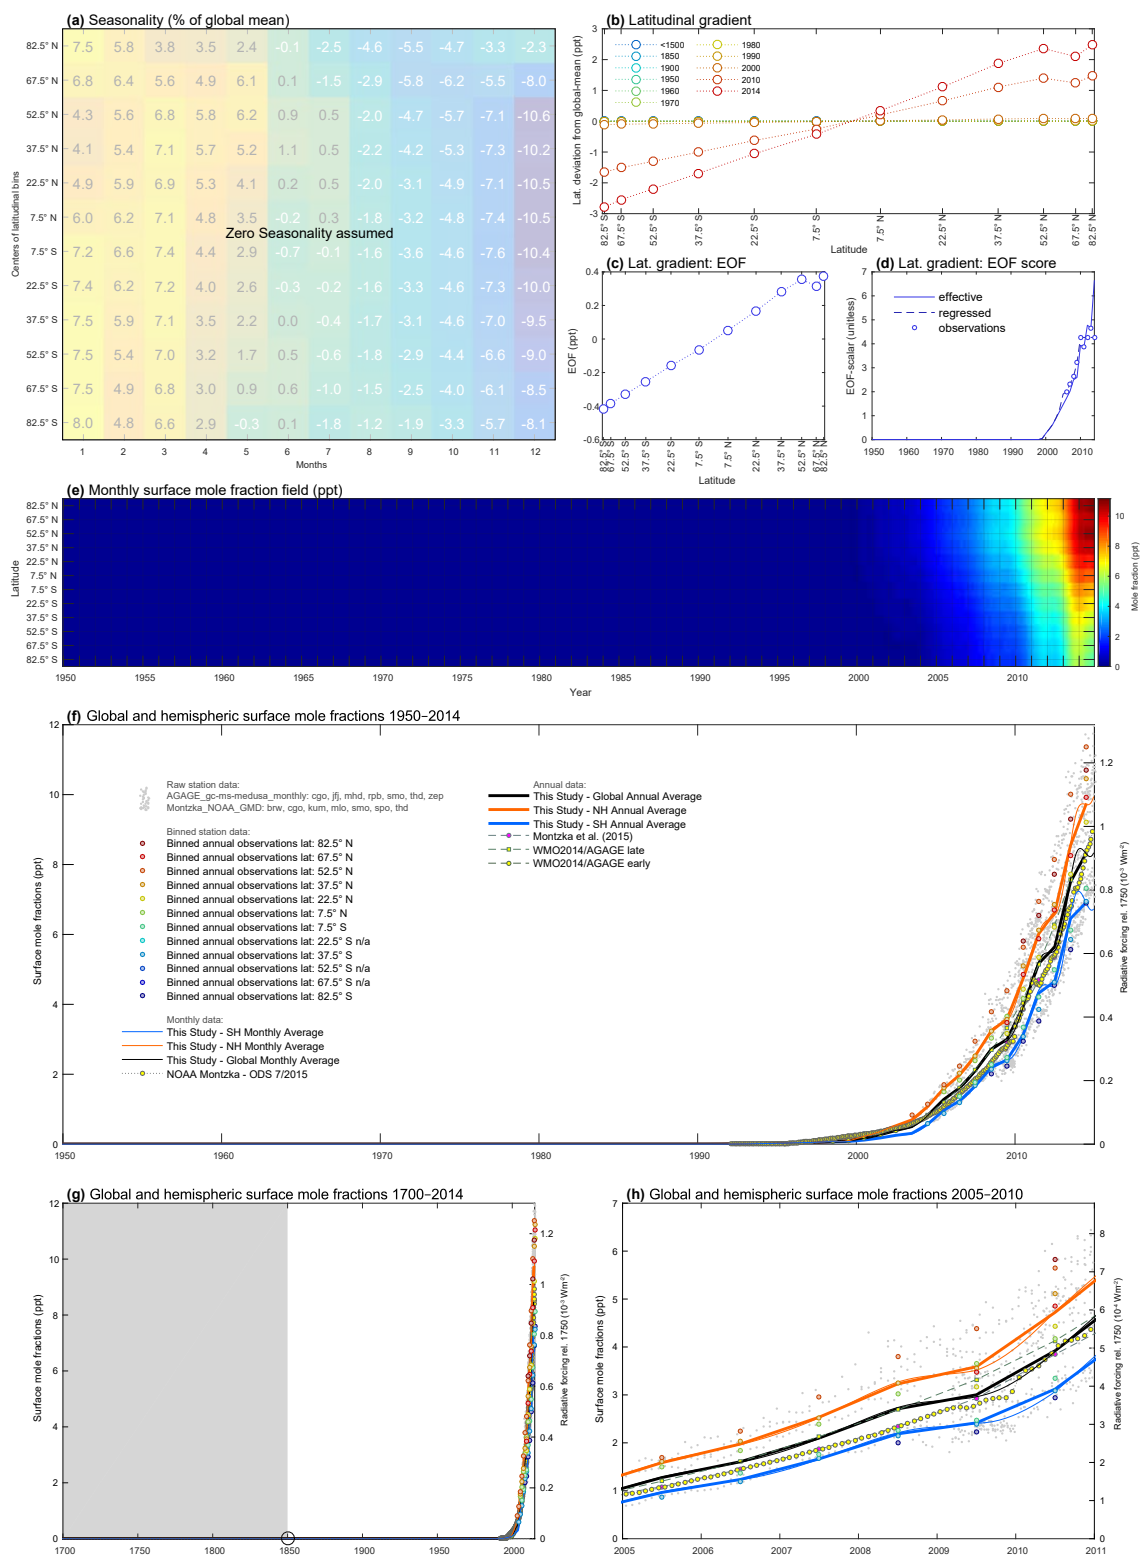

Figure S28. HFC-32 Factsheet

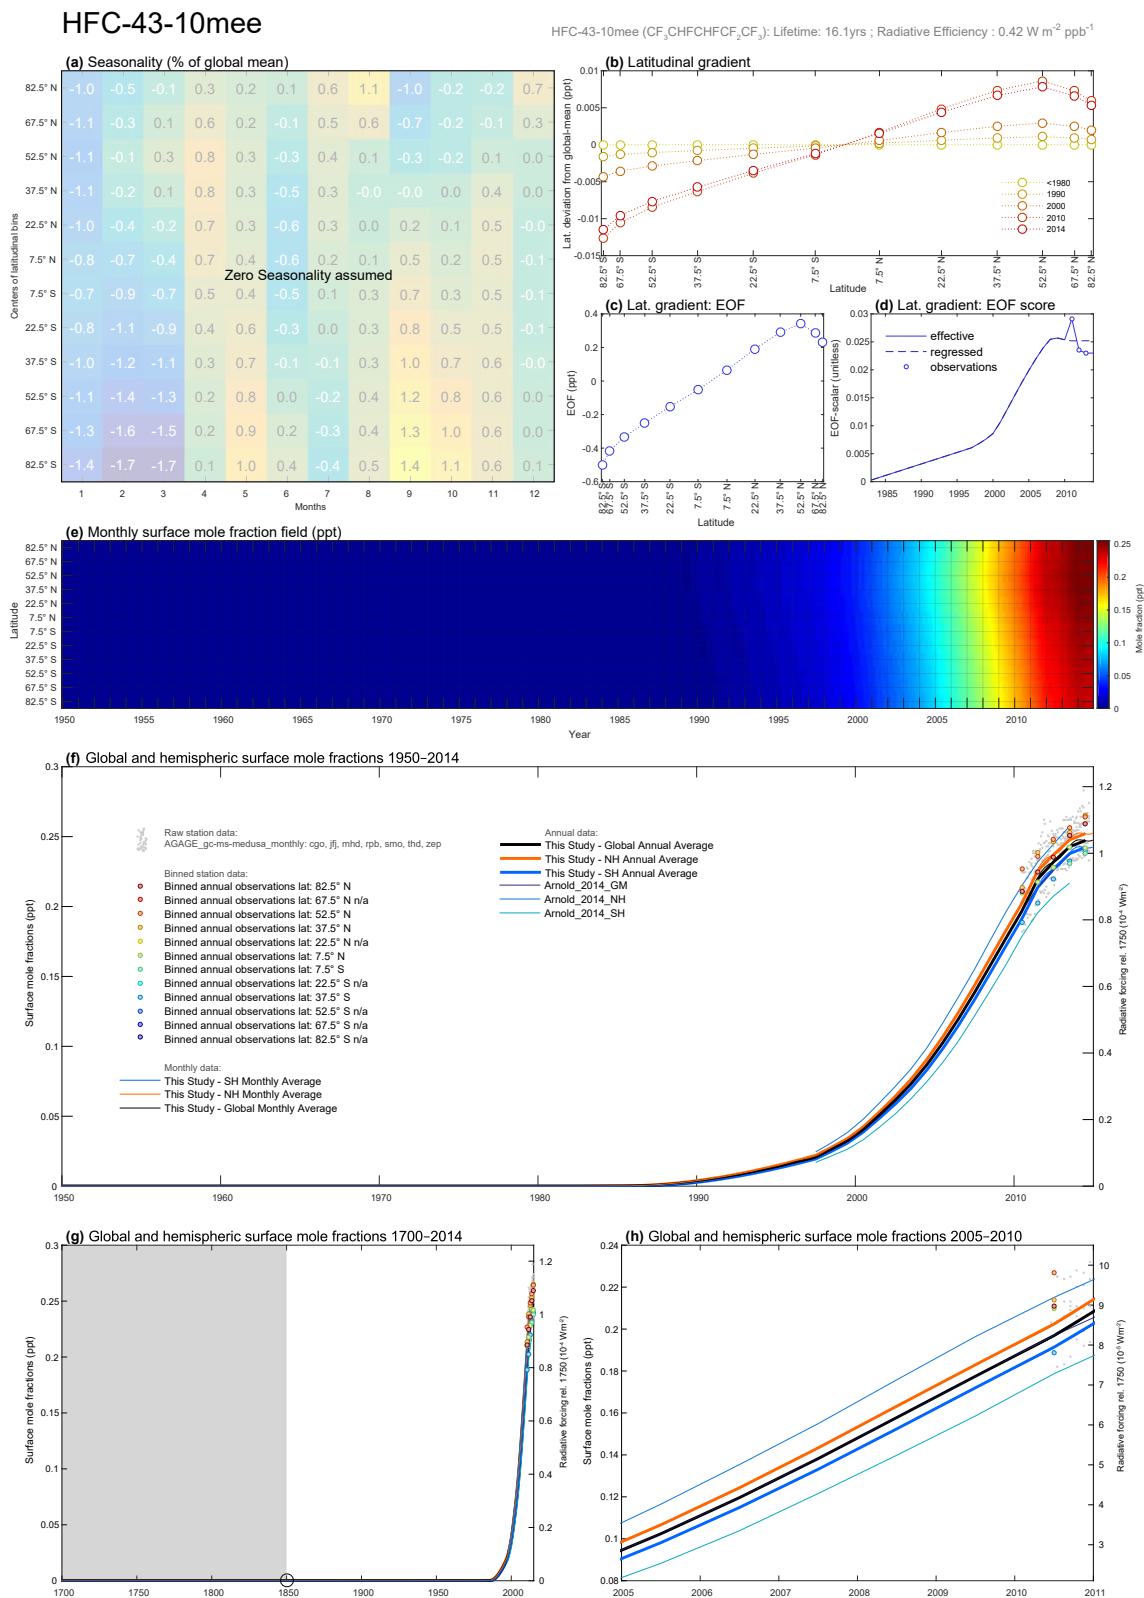

Figure S29. HFC-43-10-mee Factsheet

# HFC-125

HFC-125 ( $\text{CHF}_2\text{CF}_3$ ): Lifetime: 28.2yrs ; Radiative Efficiency :  $0.23 \text{ W m}^{-2} \text{ ppb}^{-1}$

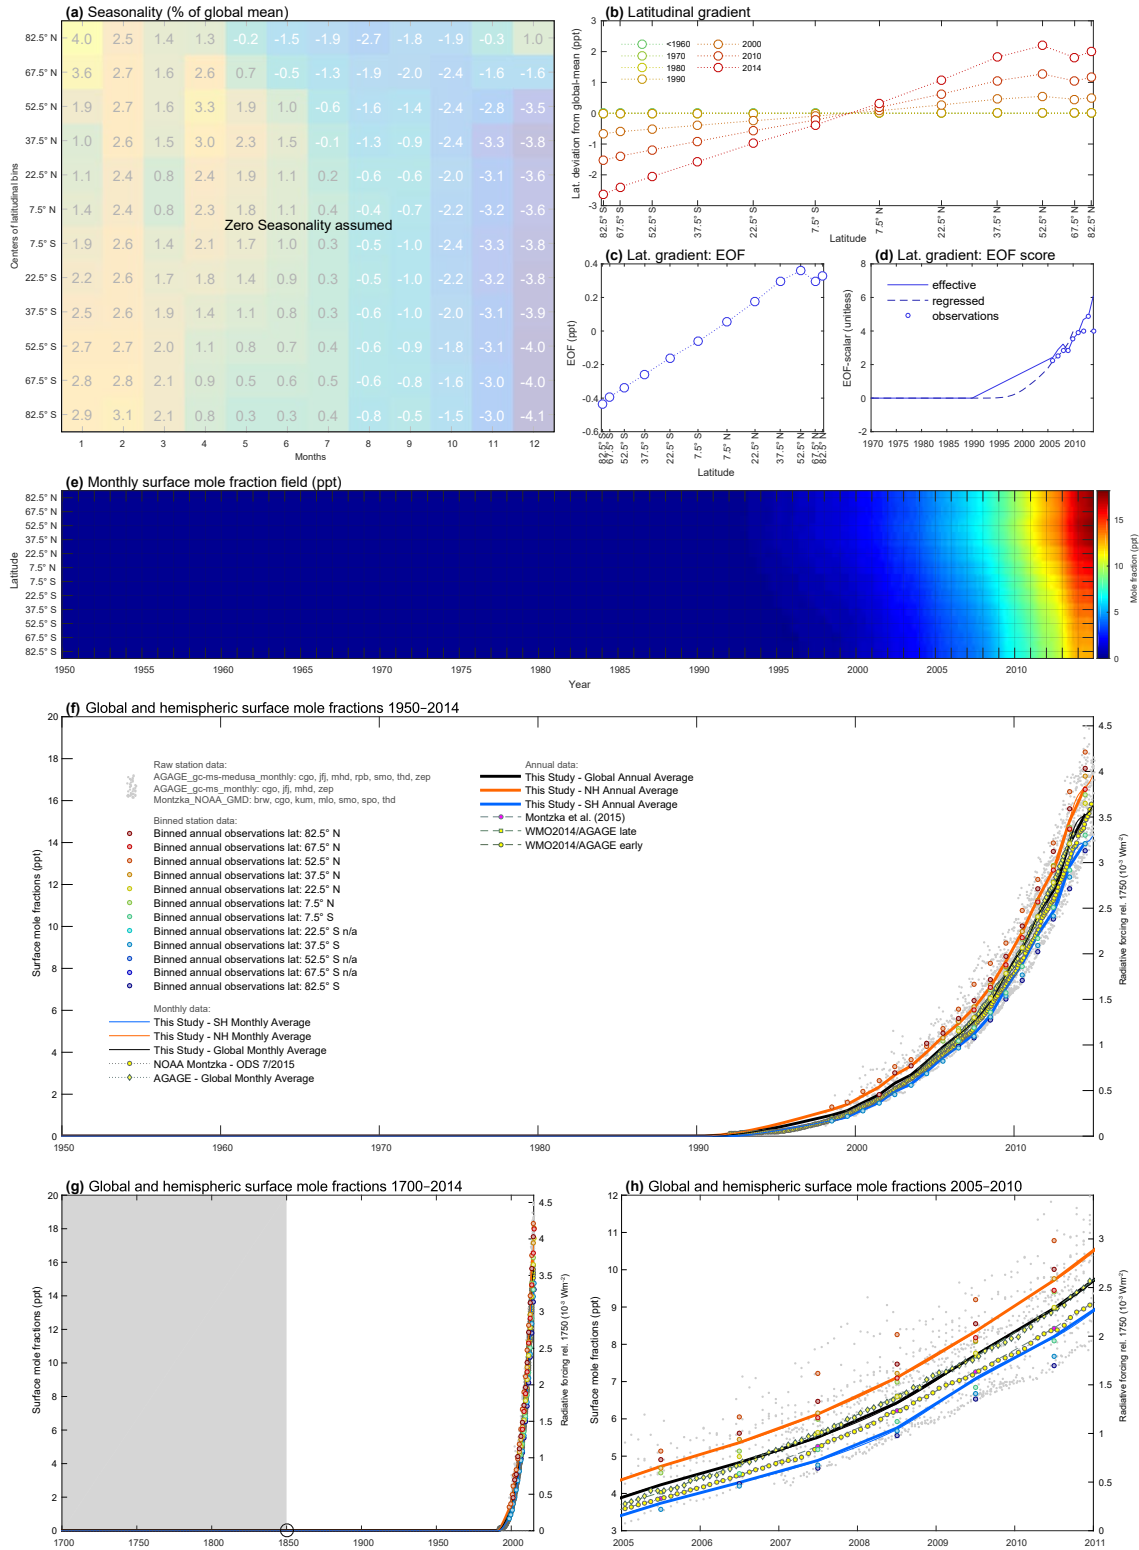

Figure S30. HFC-125 Factsheet

## HFC-134a

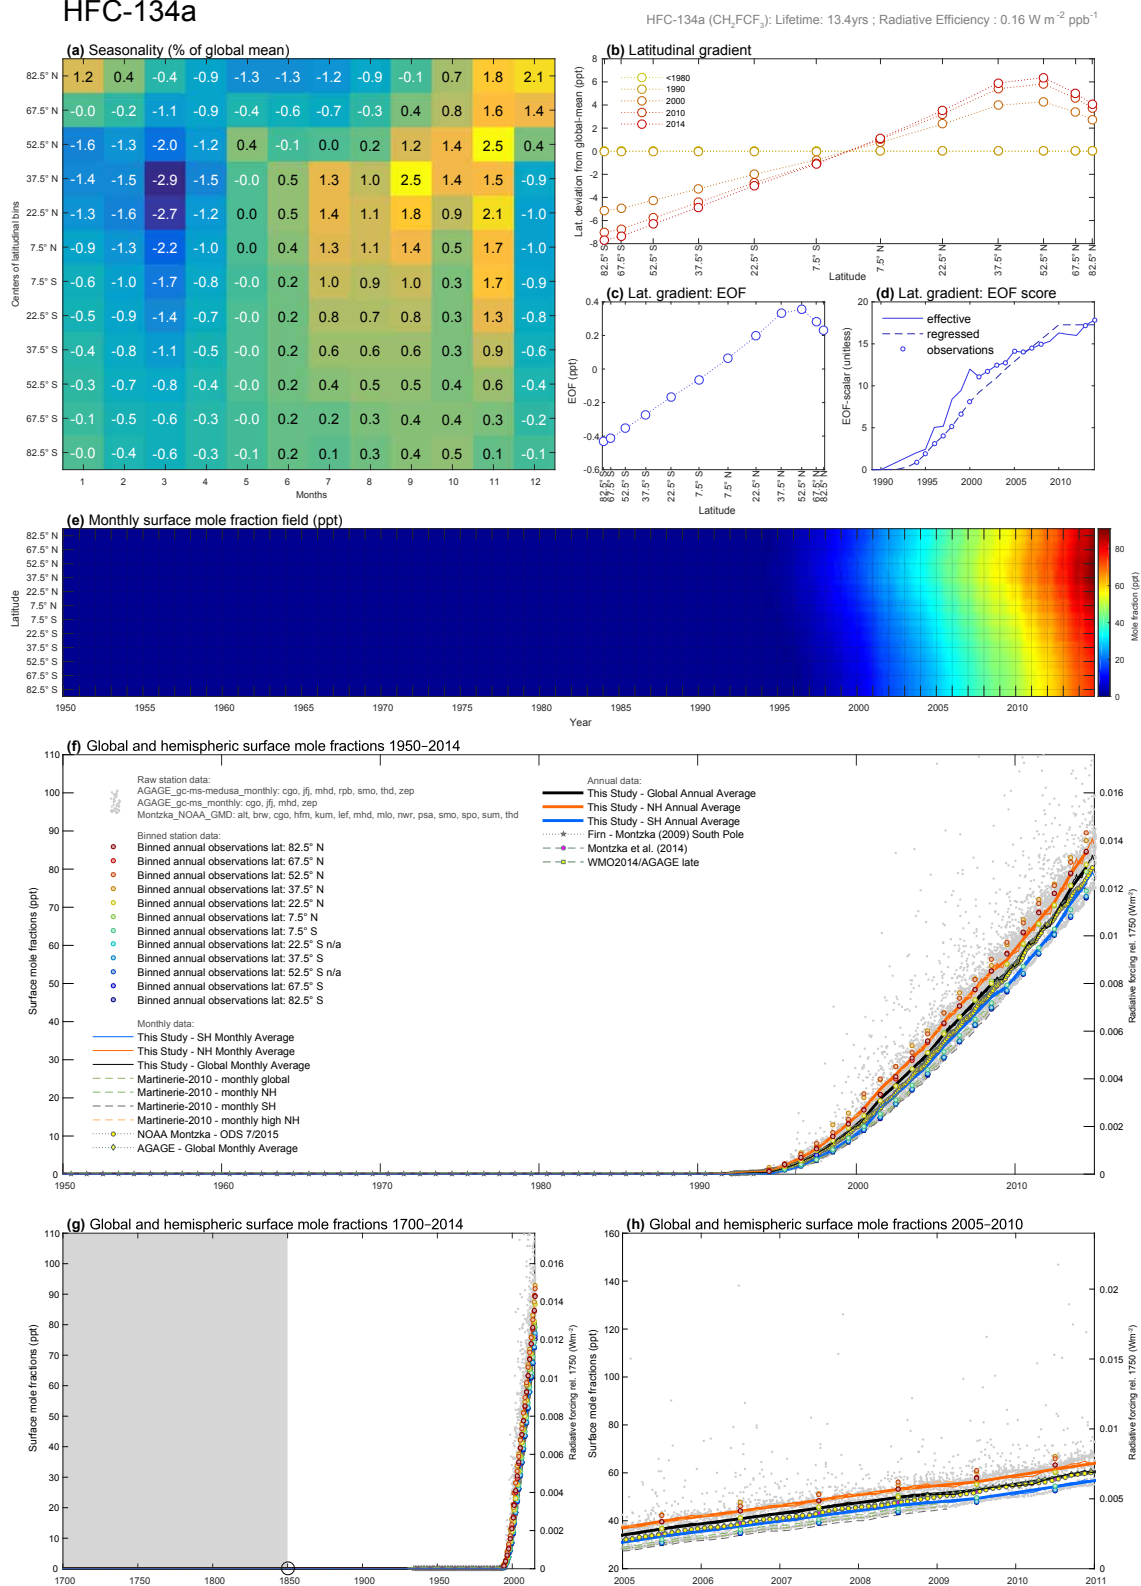

Figure S31. HFC-134a Factsheet



## HFC-143a

HFC-143a ( $\text{CH}_2\text{F}_3$ ); Lifetime: 47.1yrs ; Radiative Efficiency :  $0.16 \text{ W m}^{-2} \text{ ppb}^{-1}$ 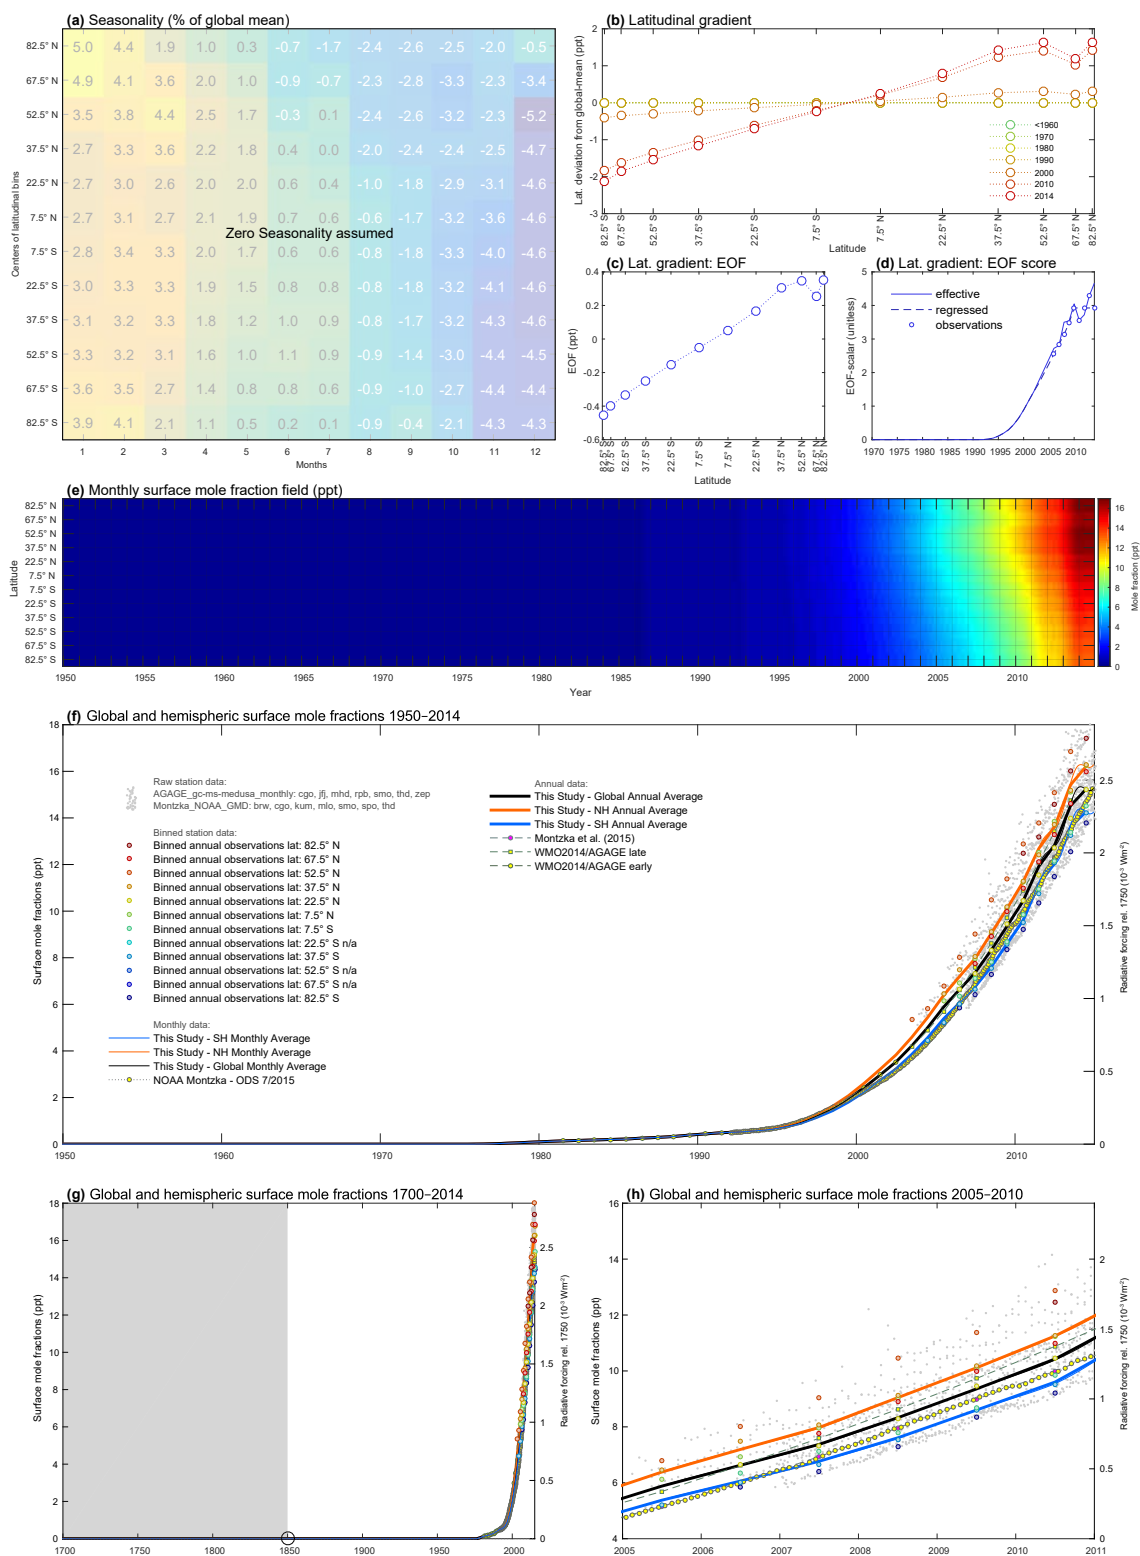

Figure S32. HFC-143a Factsheet



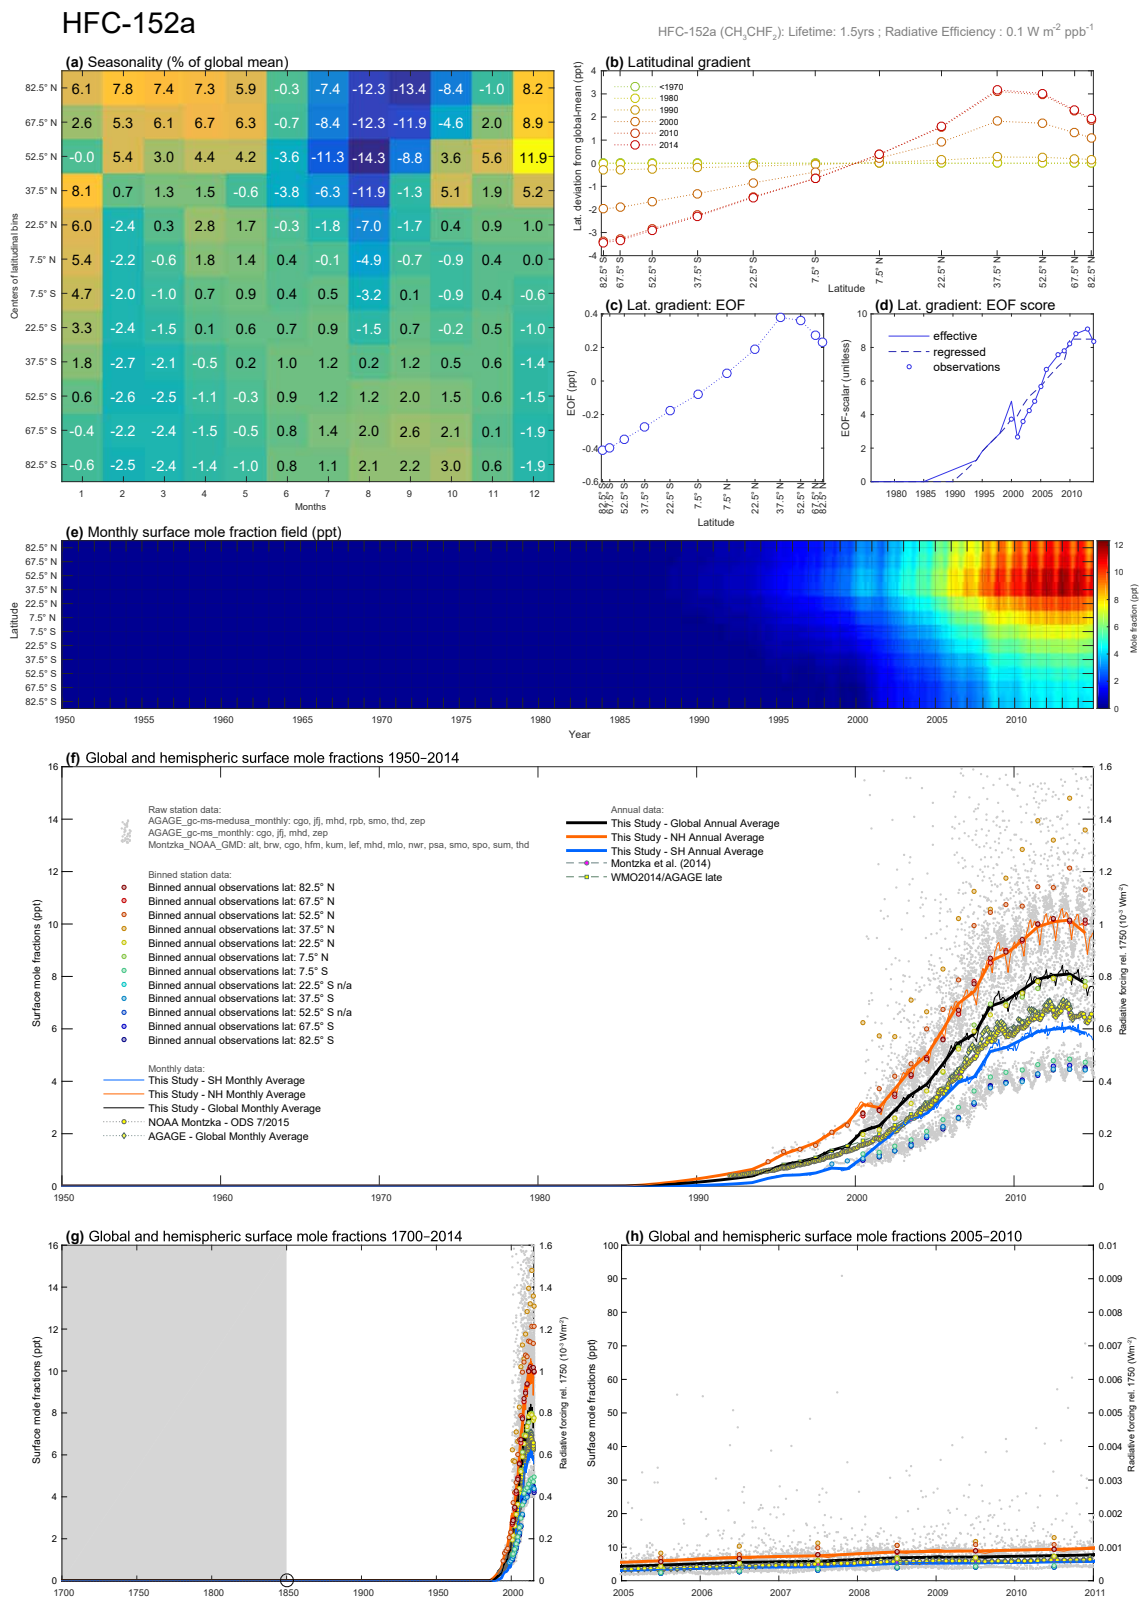

Figure S33. HFC-152a Factsheet

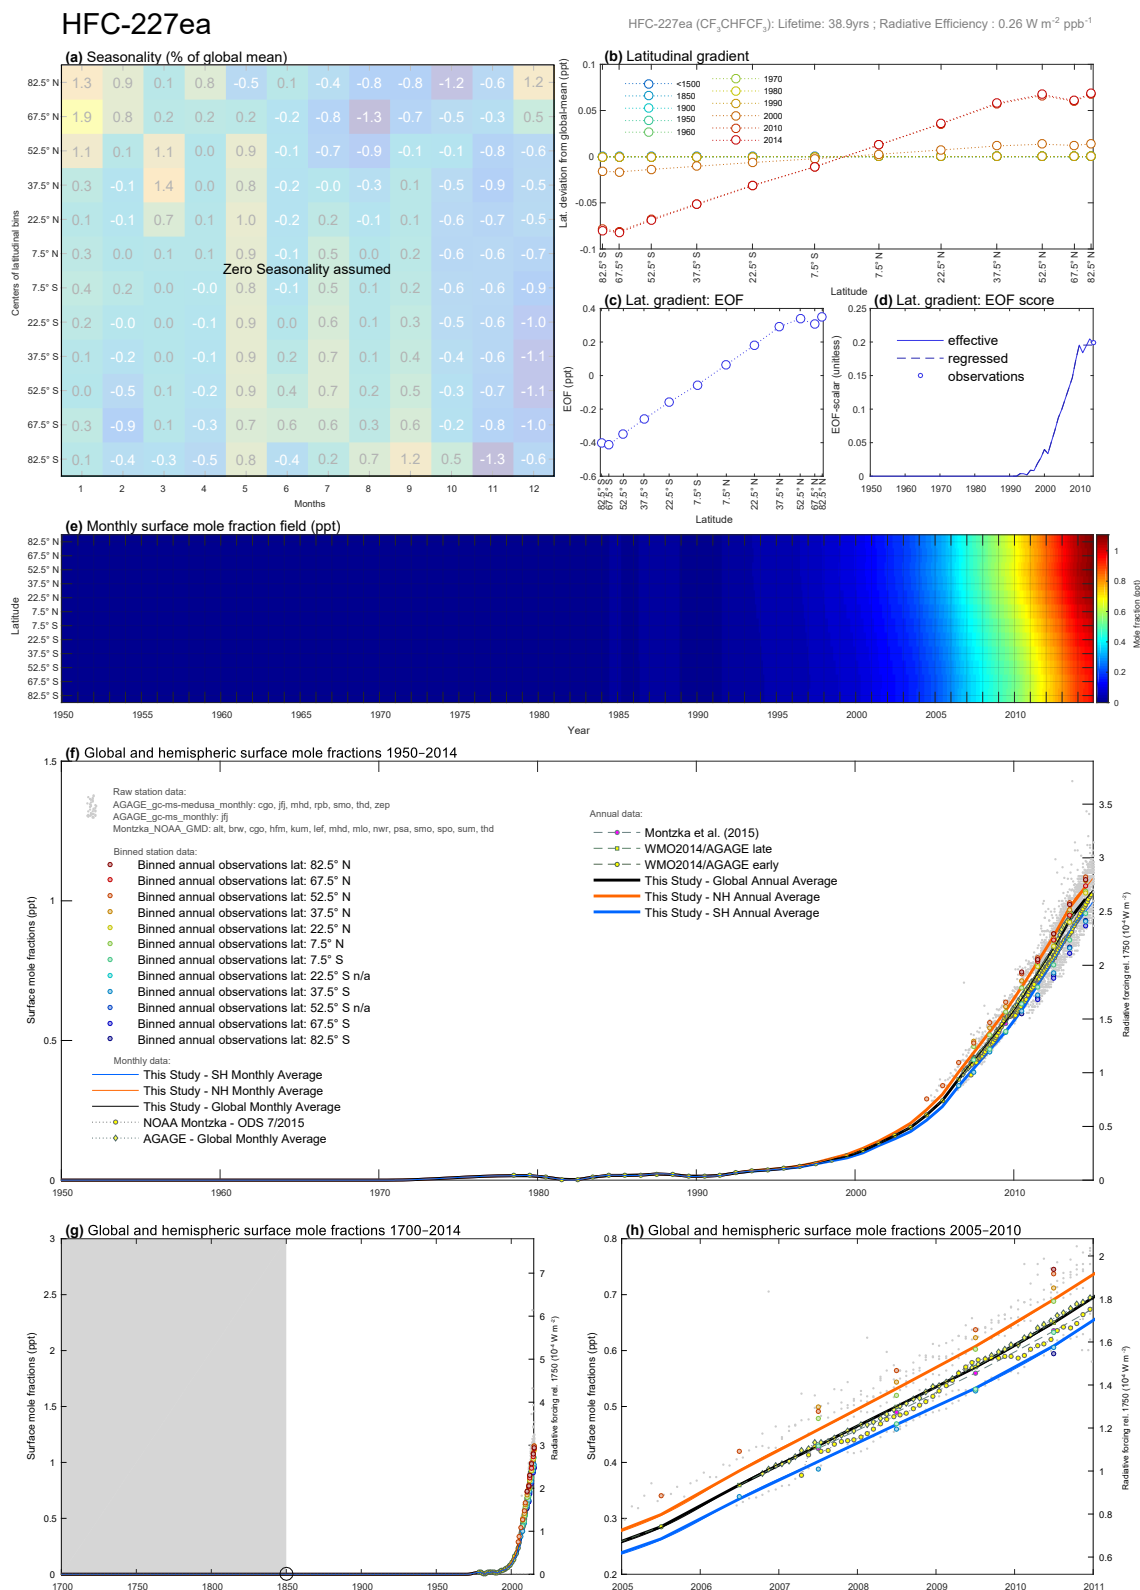

Figure S34. HFC-227ea Factsheet

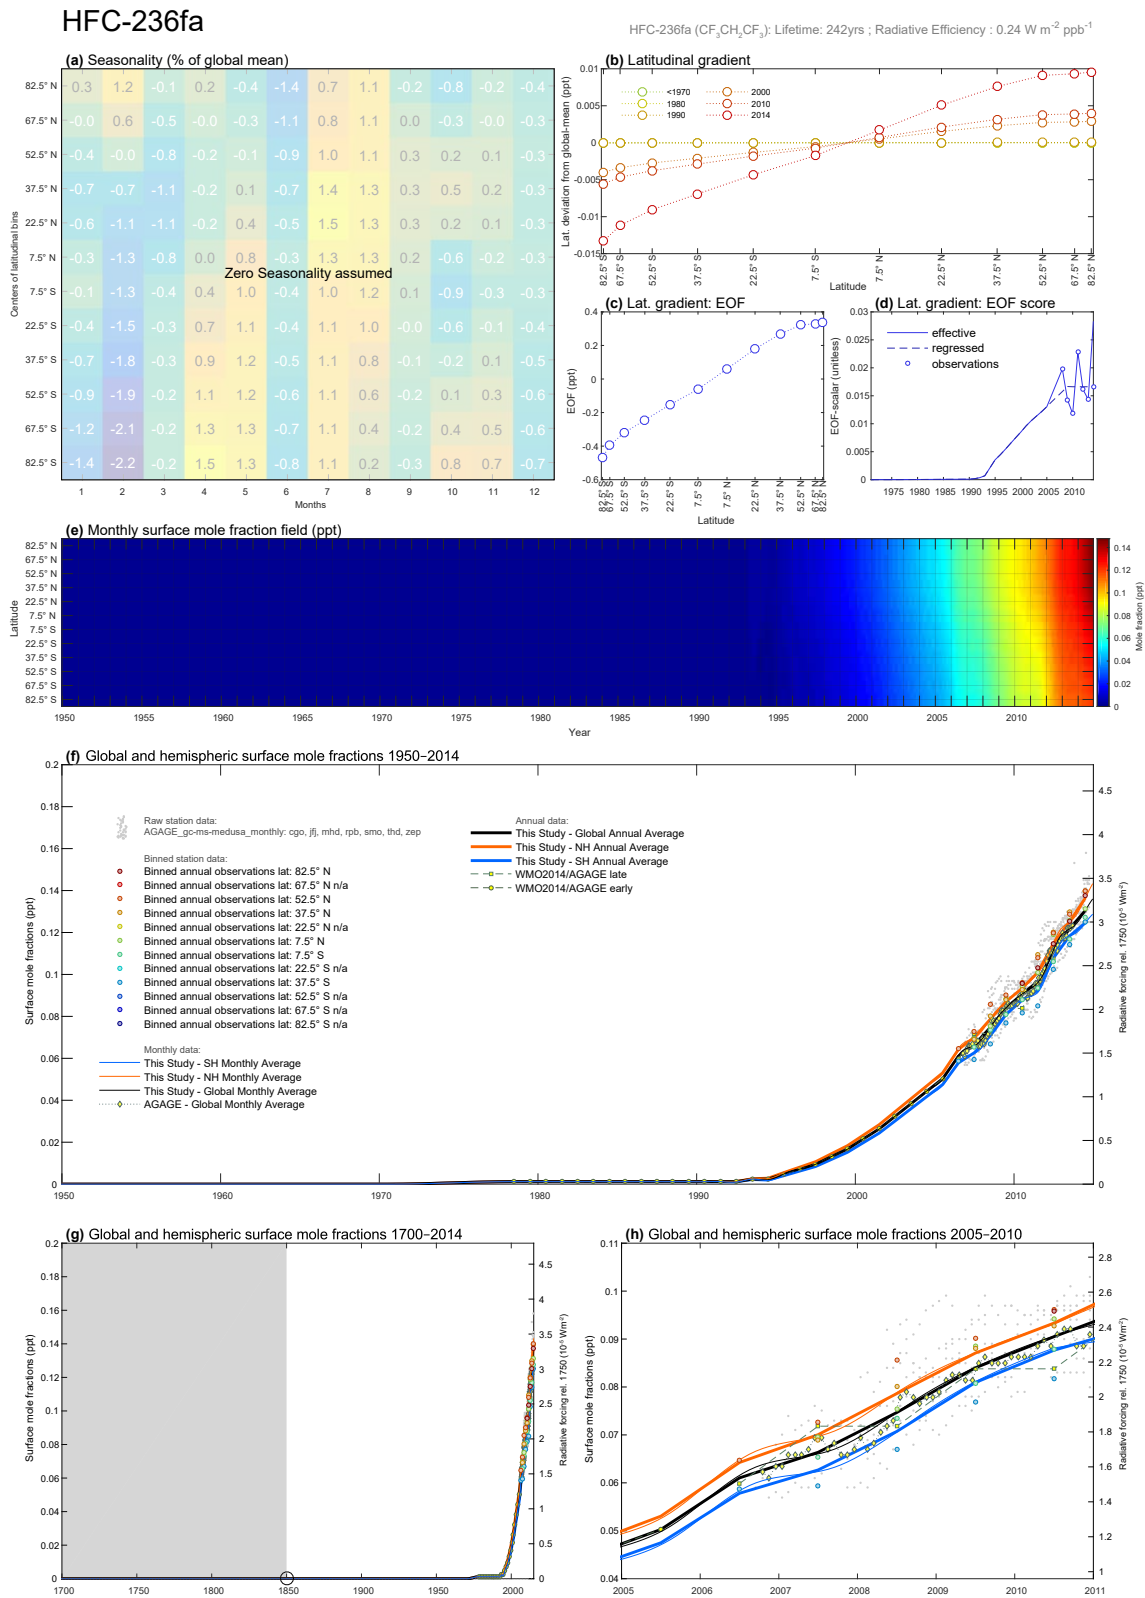

Figure S35. HFC-236fa Factsheet

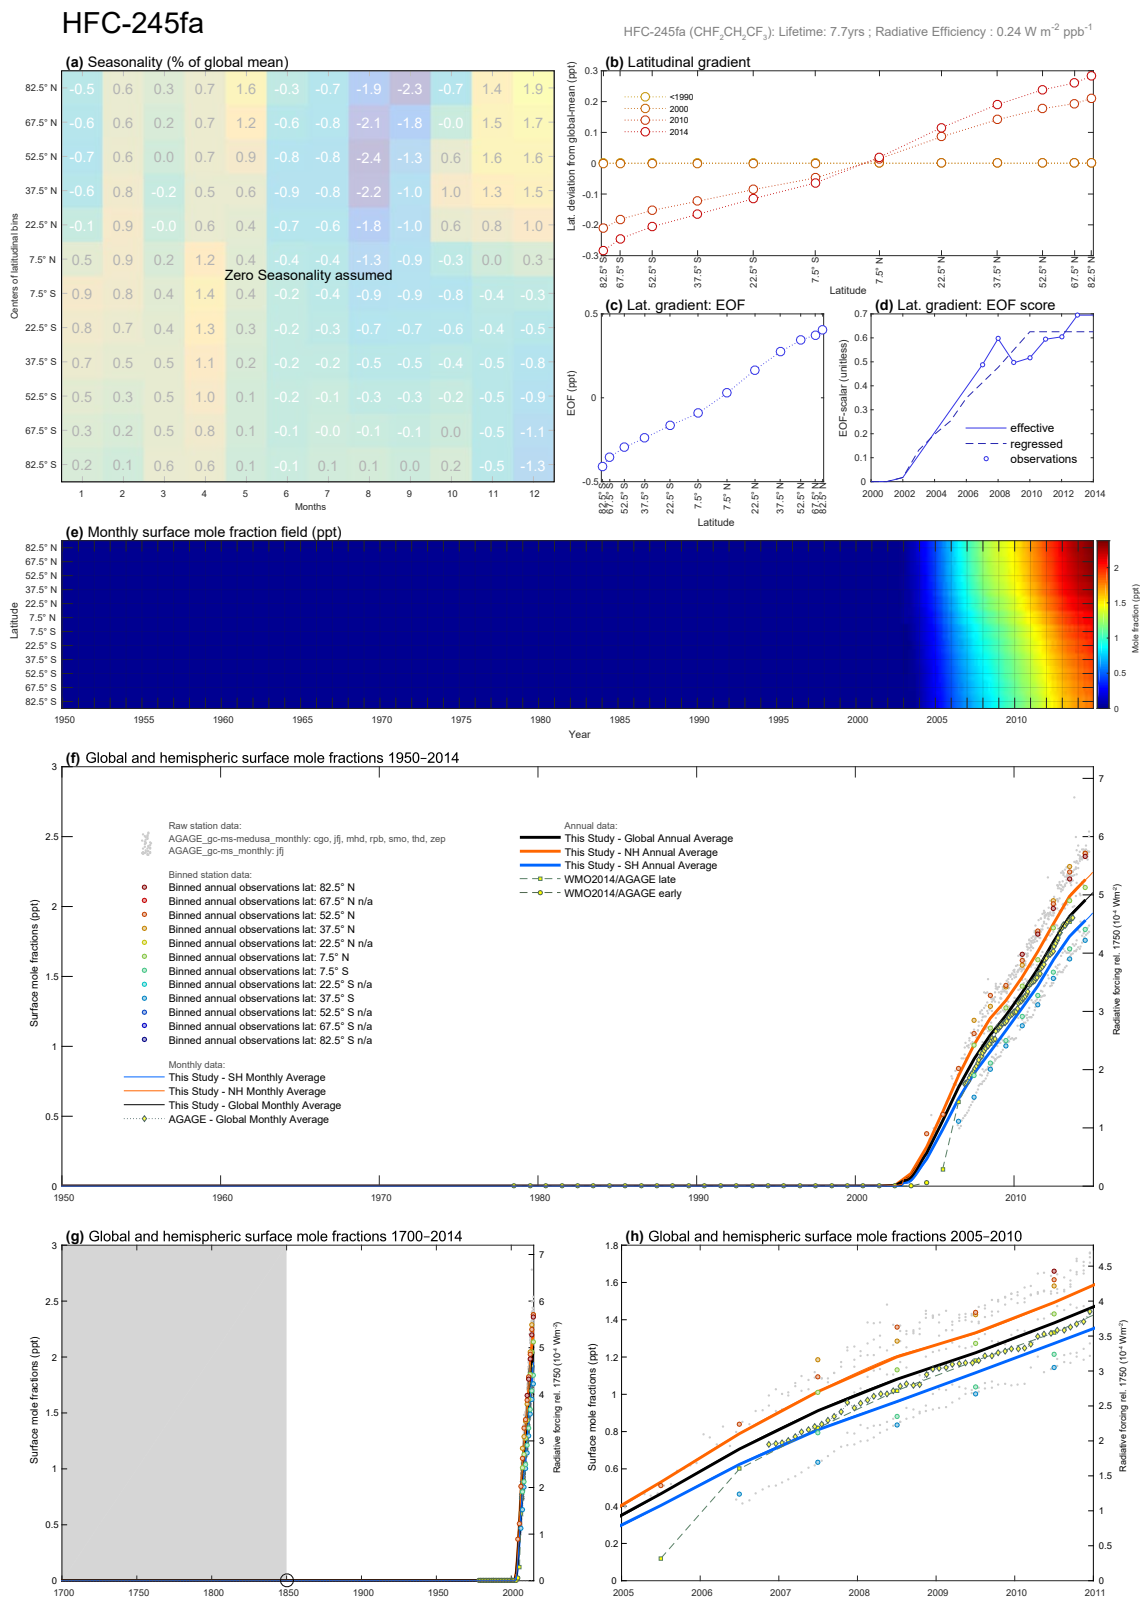

Figure S36. HFC-245fa Factsheet

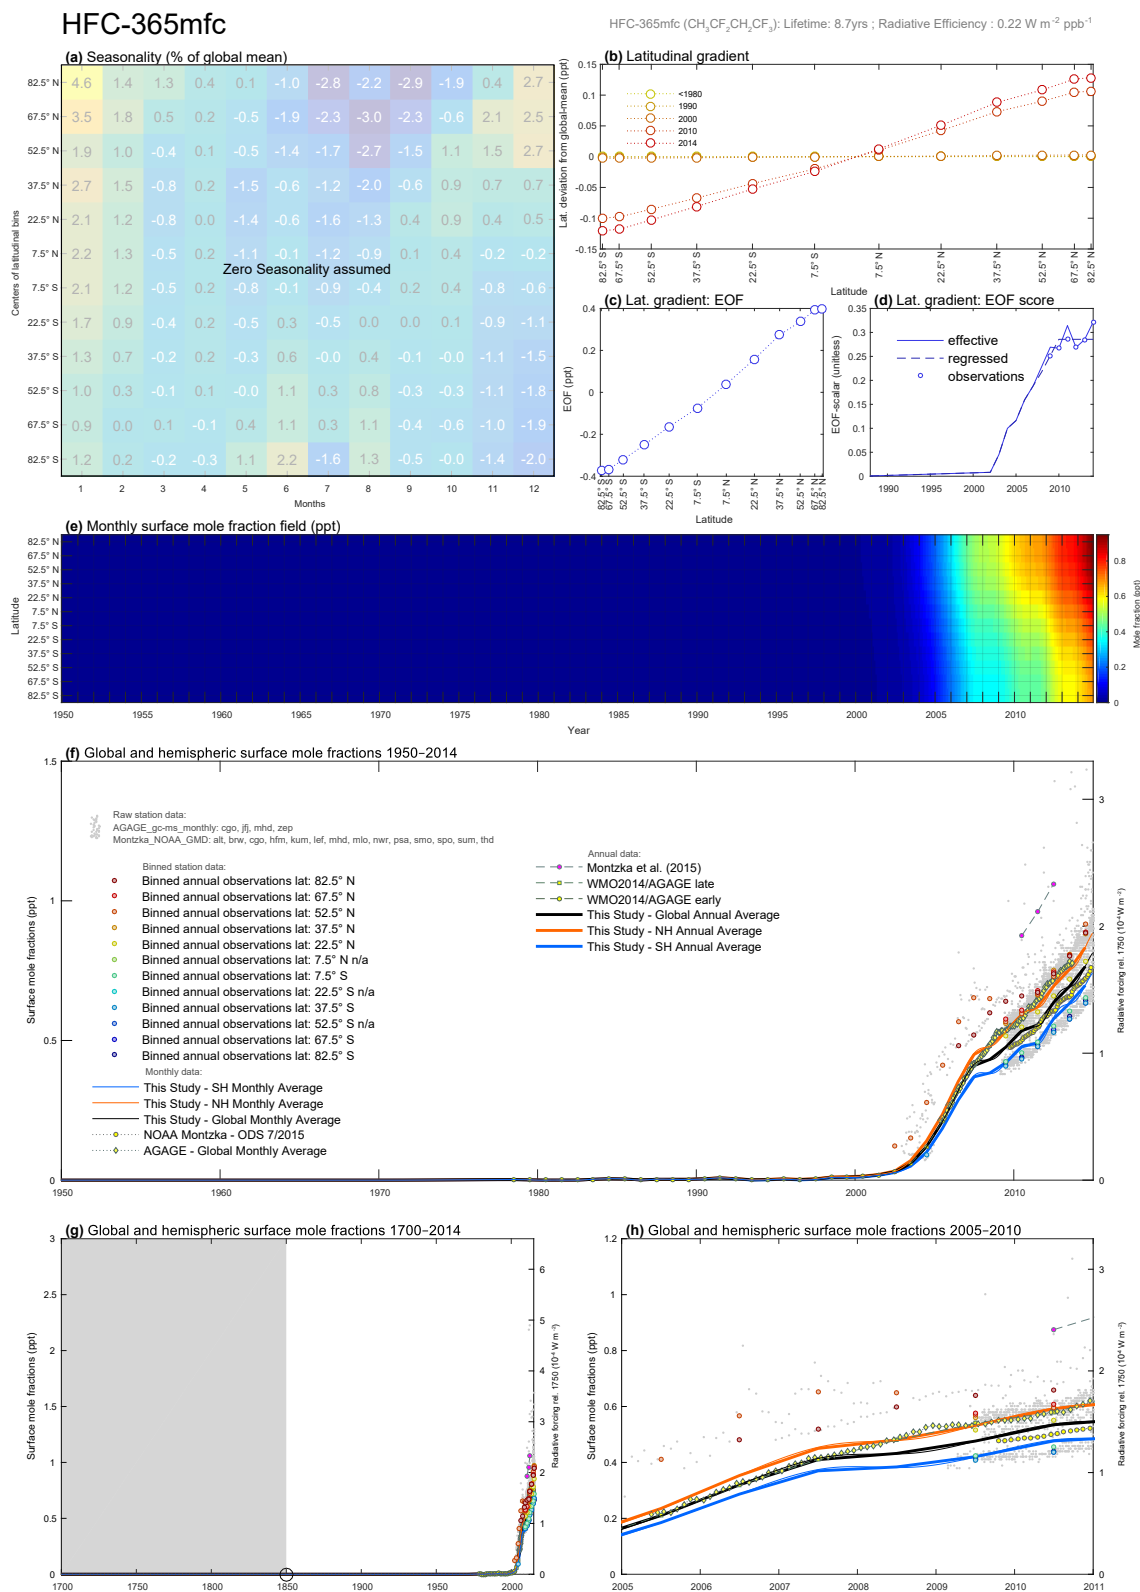

Figure S37. HFC-365mfc Factsheet

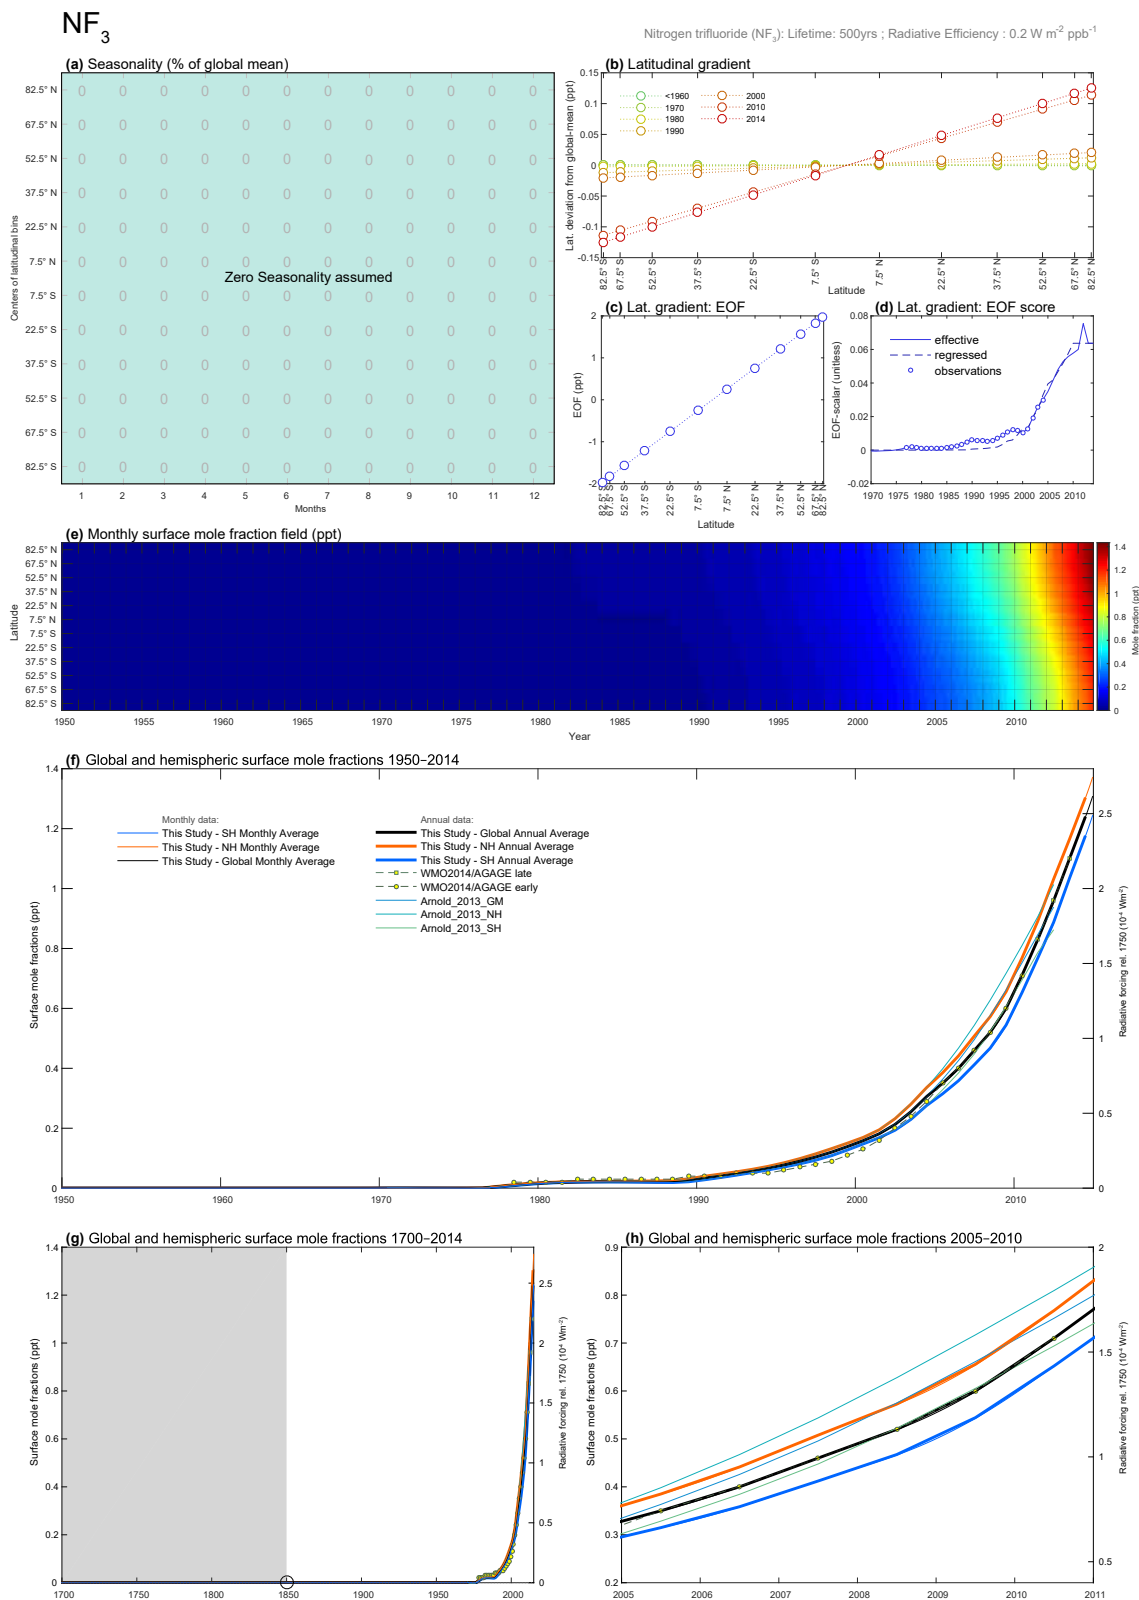Figure S38. NF<sub>3</sub> Factsheet

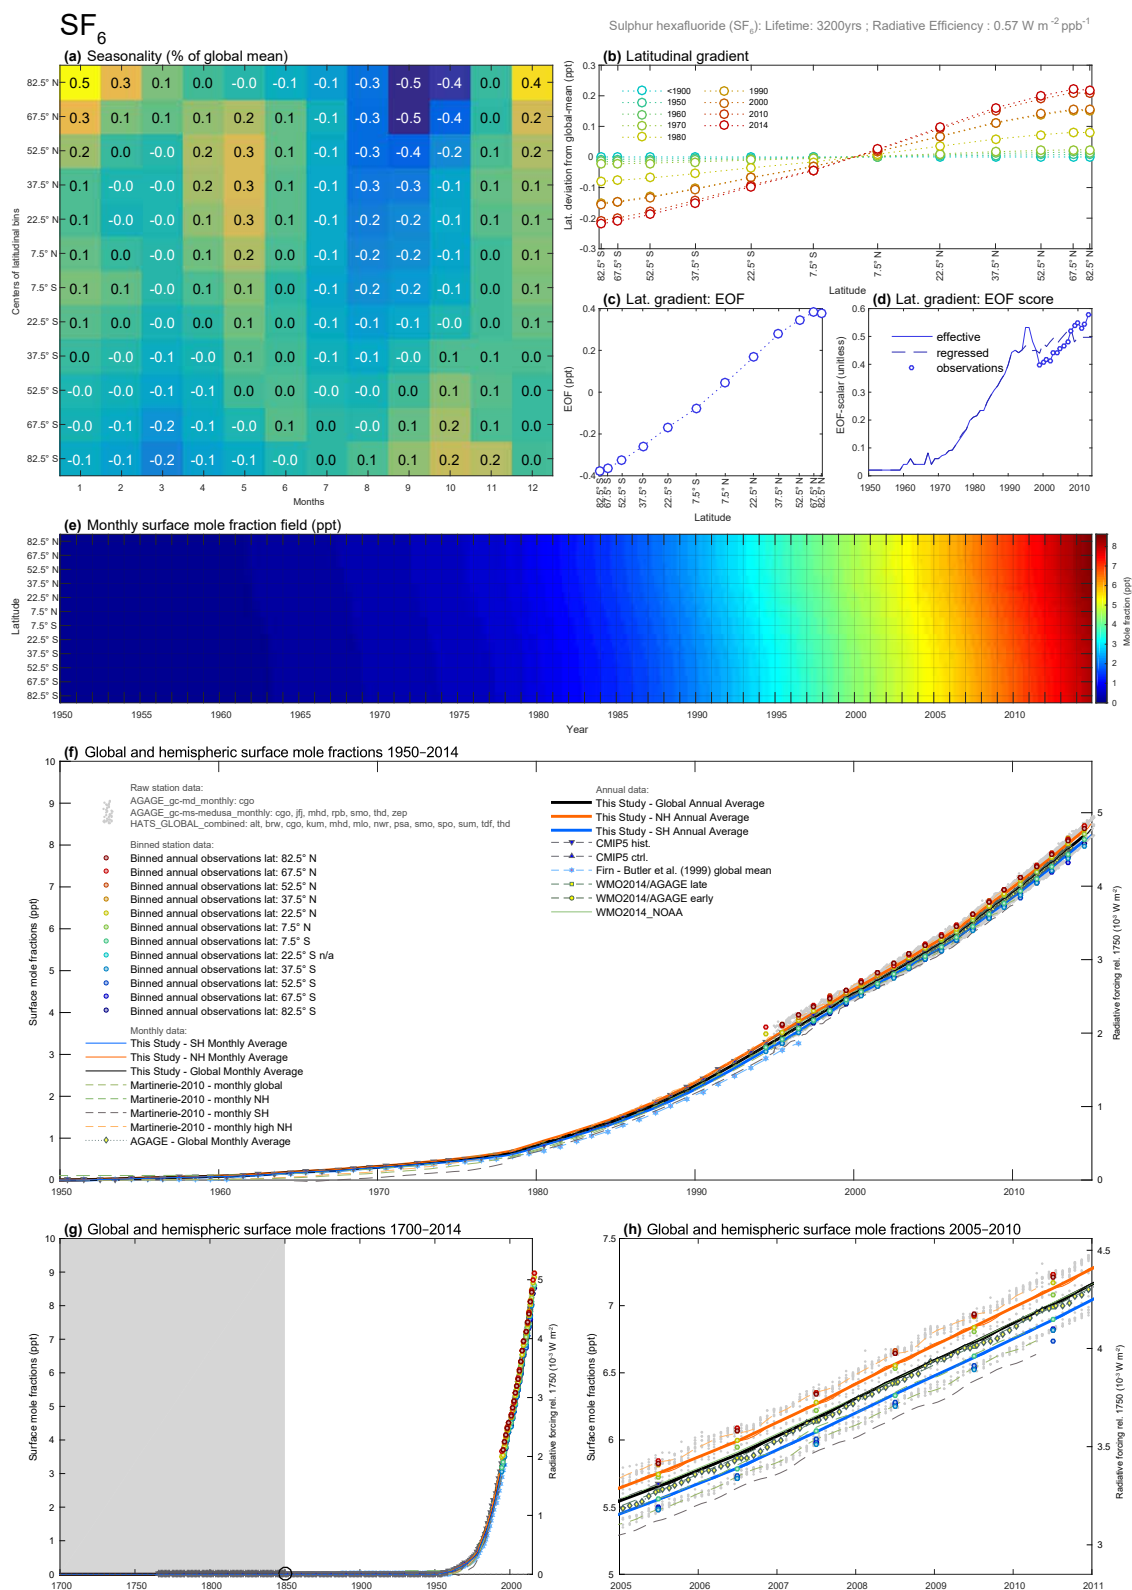Figure S39. SF<sub>6</sub> Factsheet



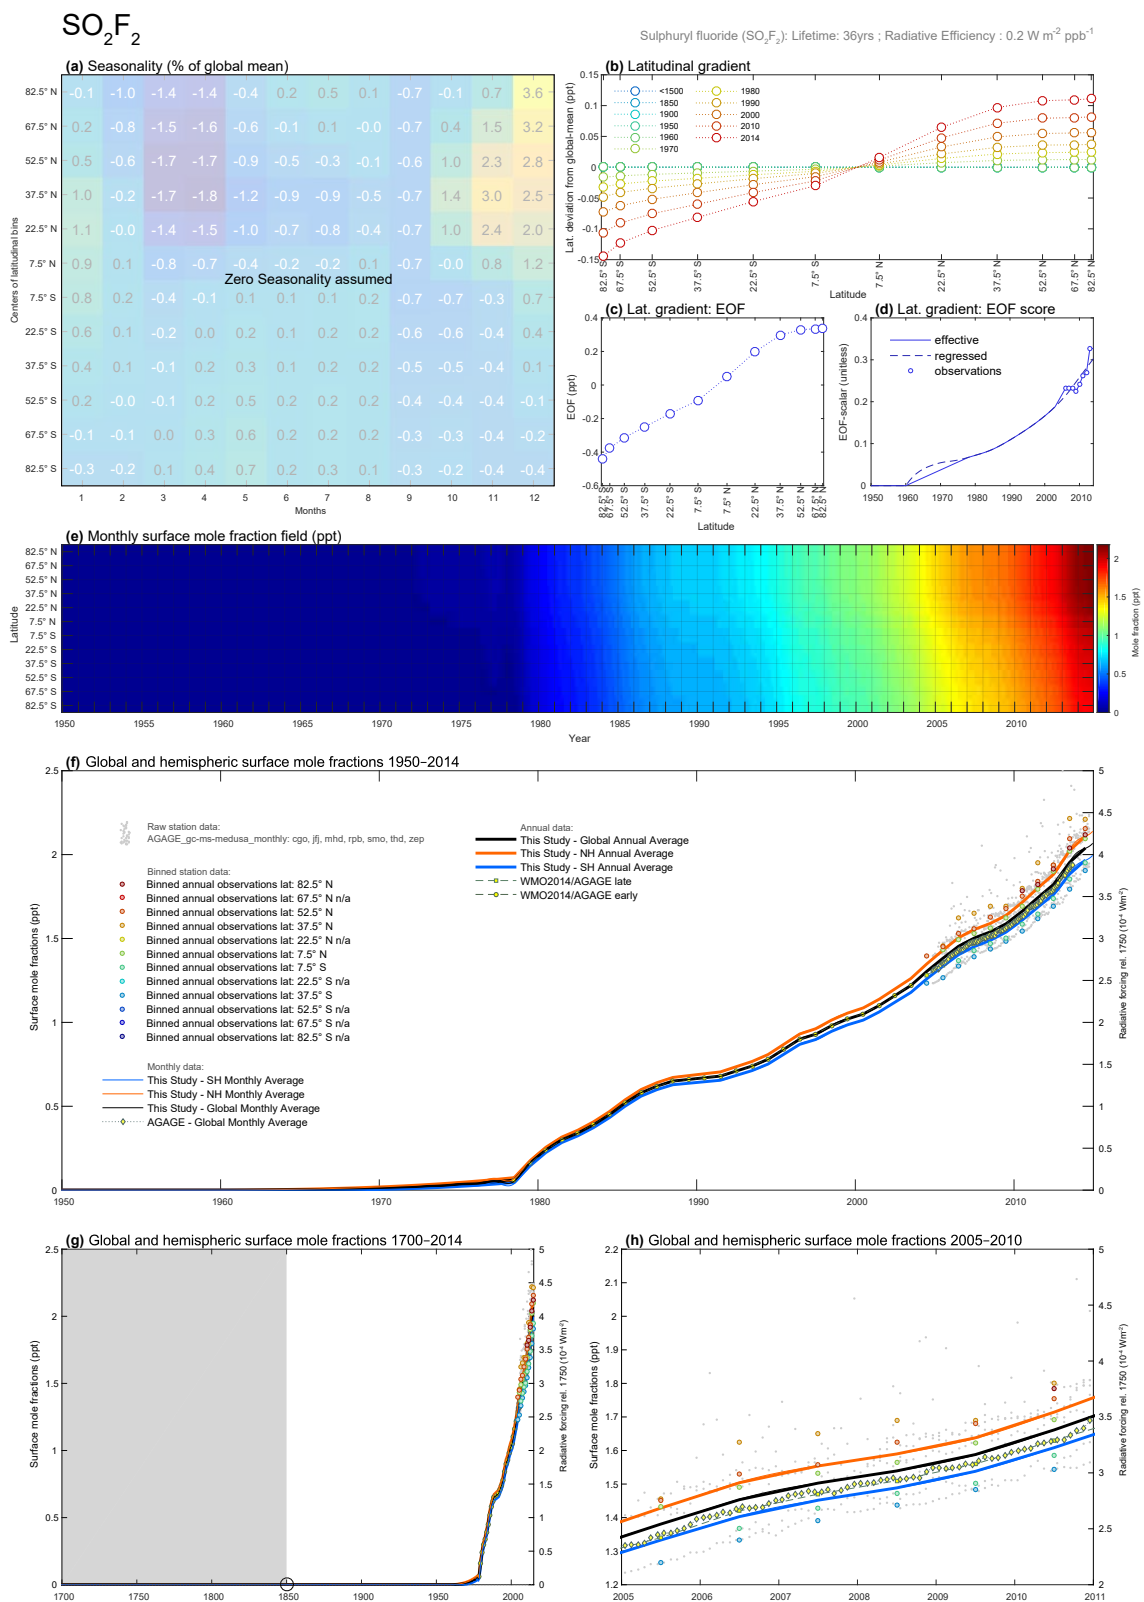Figure S40. SO<sub>2</sub>F<sub>2</sub> Factsheet

**2 Supplement B:**

CMIP5 Analysis of CO<sub>2</sub> concentration fields

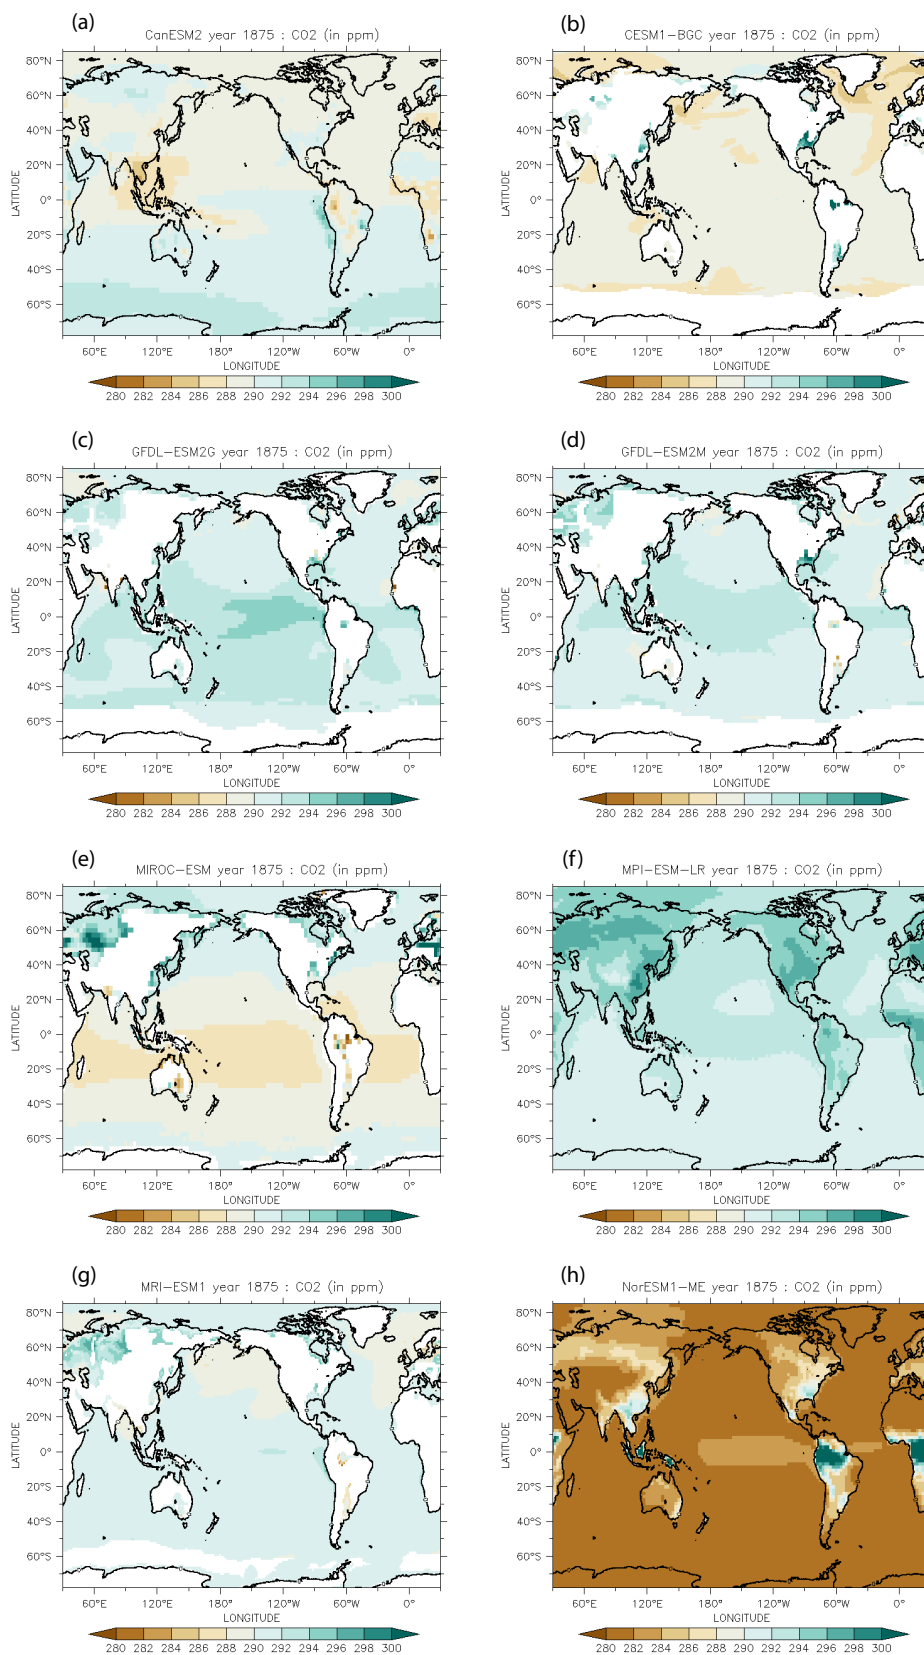

**Figure S41.** Annual mean CO<sub>2</sub> concentrations in 8 CMIP5 ESM models in the year 1875. The CMIP5 recommended value was 288.7 ppm for 1875. Two more models with higher average CO<sub>2</sub> concentrations, namely BNU-ESM and FIO-ESM, are shown in Fig. S47.

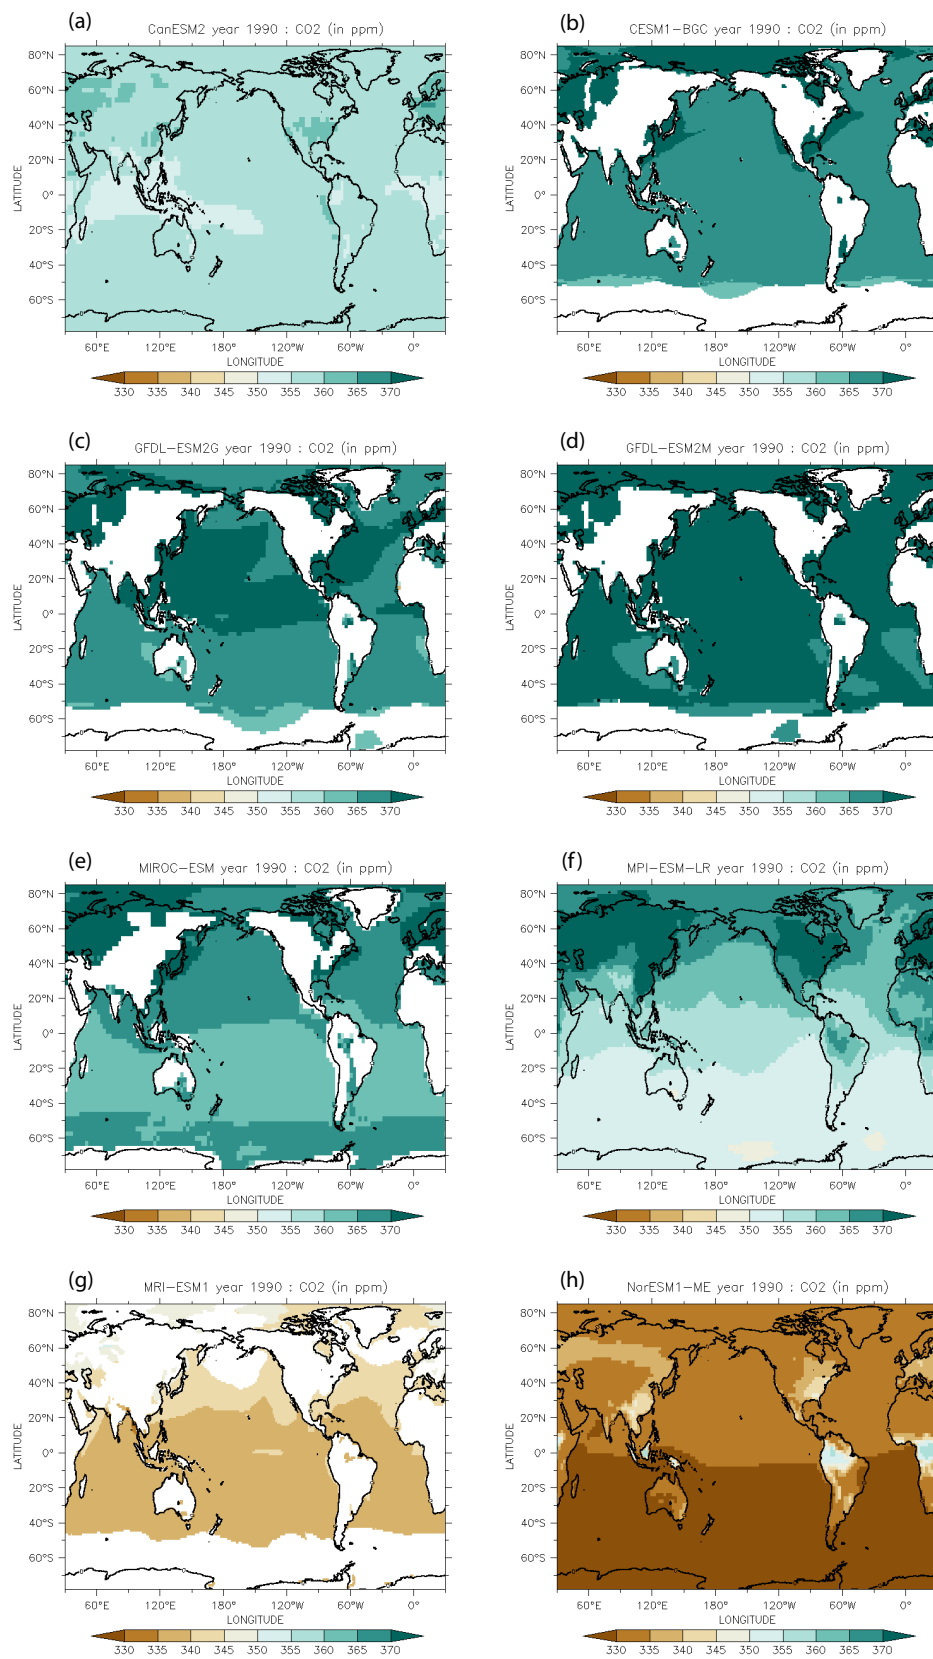

**Figure S42.** Annual mean CO<sub>2</sub> concentrations in 8 CMIP5 ESM models in the year 1990. The CMIP5 recommended value was 353.885 ppm for 1990 in the historical experiment.

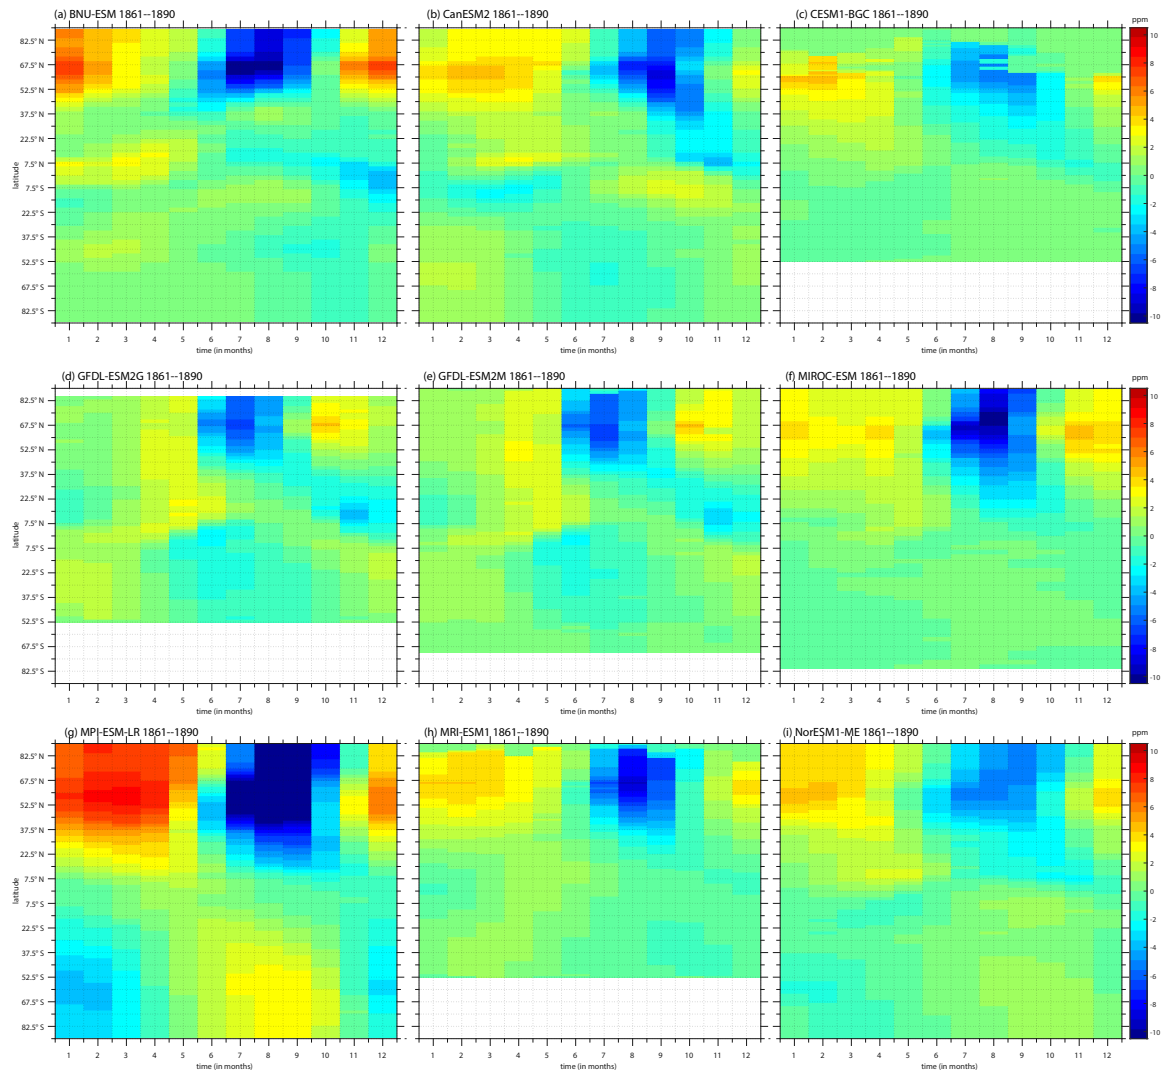

**Figure S43.** Climatological seasonal cycle of CO<sub>2</sub> concentrations in 9 CMIP5 ESM models for the historical experiment's 30-year period 1861-1890.

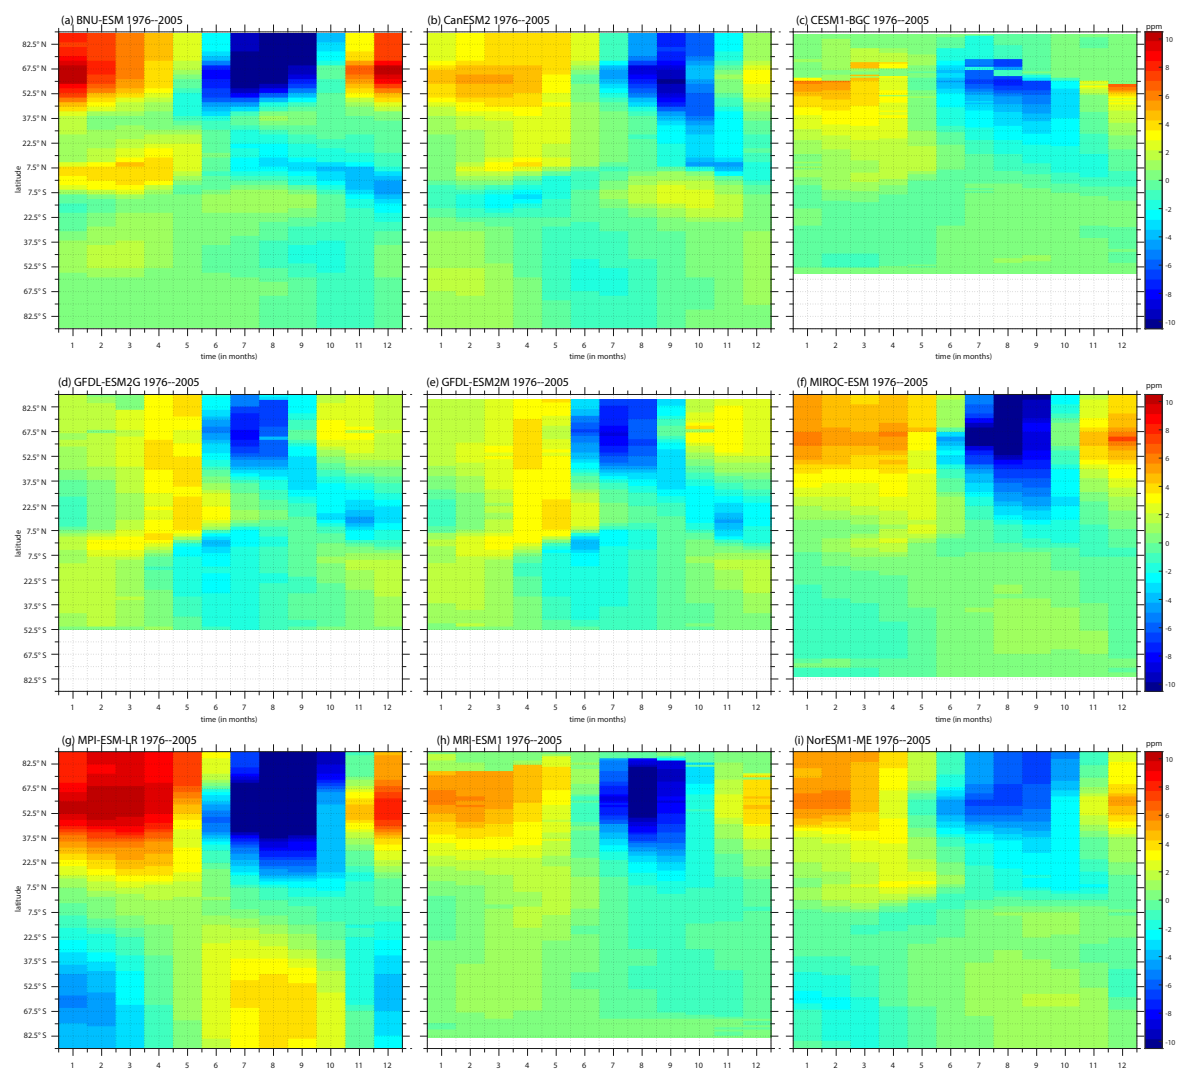

**Figure S44.** Climatological seasonal cycle of CO<sub>2</sub> concentrations in 9 CMIP5 ESM models for the historical experiment's 30-year period 1976-2005.

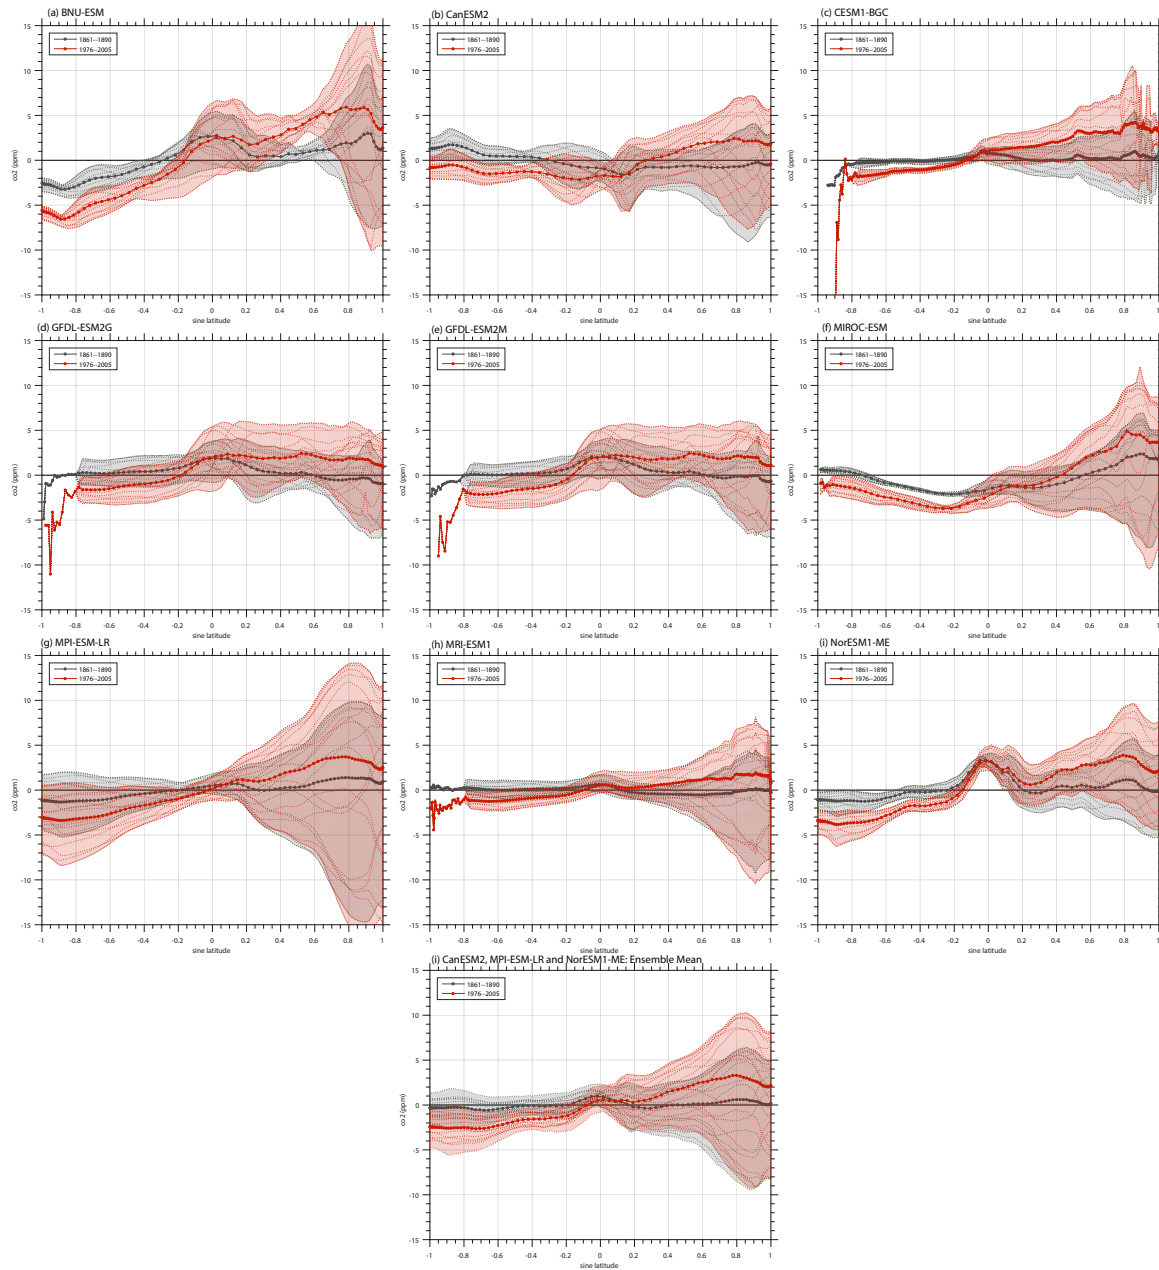

**Figure S45.** Latitudinal gradient of surface atmospheric CO<sub>2</sub> concentrations exhibited in 9 considered CMIP5 ESM models for both the preindustrial period (grey lines) and recent period 1976-2005 (red lines). The bold dotted lines indicate the annual means. The 12 finer lines represent the individual twelve monthly averages over the respective 30 year periods (shaded areas show the min-max of those monthly averages). The lowest panel shows an ensemble mean for three CMIP5 ESMs, namely CanESM2, MPI-ESM-LR and NorESM1-ME.



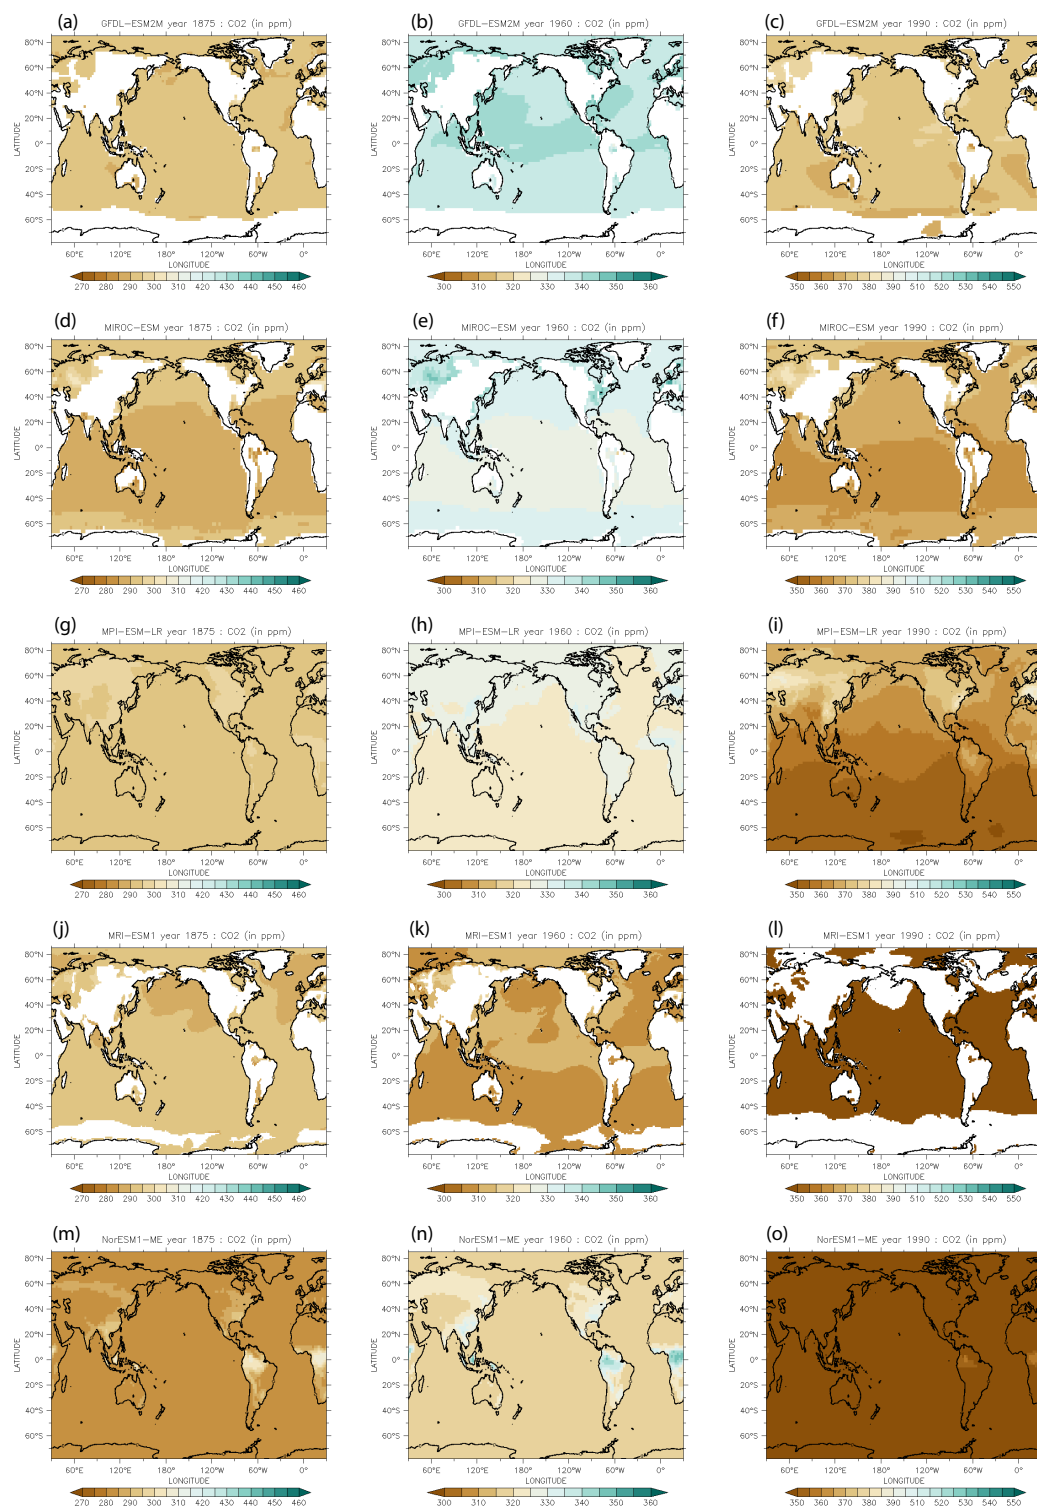

**Figure S46.** Annual average CO<sub>2</sub> concentration fields diagnosed from CMIP5 ESM models for the years 1875 (left column), 1960 (middle column), and 1990 (right column). All models are on the same colour scale, with colouring steps at 5 ppm. 1990 annual average CO<sub>2</sub> concentrations are estimated in this study to be 354.07 ppm and had been specified for CMIP5 with 353.855 ppm.

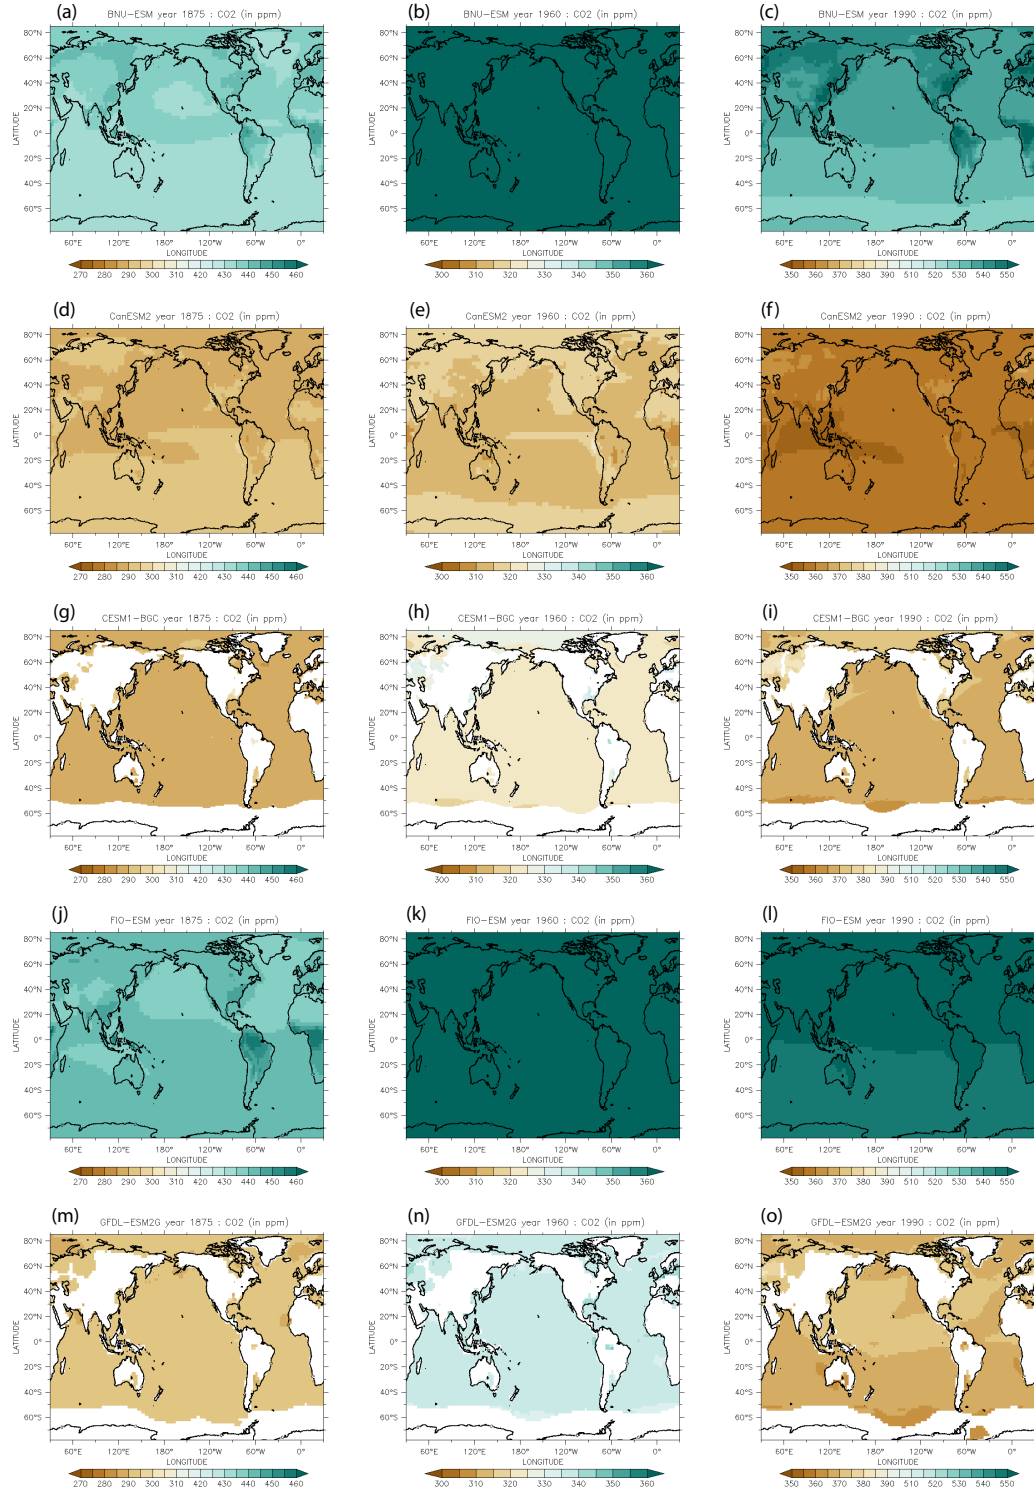

**Figure S47.** As Fig. S46, but for a different set of five CMIP5 ESM models.
