# Supplementary material for: Historical greenhouse gas concentrations for climate modelling (CMIP6)
Source: Copernicus journal article supplement (doi:10.5194/gmd-10-2057-2017), 2017-05-31
Supplement: Supplementary file [file gmd-10-2057-2017-supplement-title-page.pdf › gmd-10-2057-2017-supplement-title-page.pdf]

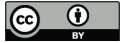

*Supplement of*

## **Historical greenhouse gas concentrations for climate modelling (CMIP6)**

**M. Meinshausen et al.**

*Correspondence to:* Malte Meinshausen ([malte.meinshausen@unimelb.edu.au](mailto:malte.meinshausen@unimelb.edu.au))

- [gmd-10-2057-2017-supplement-title-page.pdf](#)
- [Supplementary\\_Table\\_UoM\\_GHGConcentrations-1-1-0\\_annualmeans\\_v23March2017.xls](#)
- [gmd-2016-169-SUPPLEMENT.pdf](#)

The copyright of individual parts of the supplement might differ from the CC-BY 3.0 licence.
